# Supplementary material for: Synthesis of pyrazoles from sulfonyl hydrazone and benzyl acrylate under transition-metal-free conditions
Source: Royal Society of Chemistry journal article supplement (doi:10.1039/d3ob01172k), 2023-01-01

# Supporting Information

## Synthesis of Pyrazoles from Sulfonyl hydrazone and benzyl acrylate under transition-metal-free conditions

Liqiang Hao,<sup>††</sup> Zhichao Wang,<sup>††</sup> Gaorong Wu,<sup>†</sup> Yangyang Wang,<sup>†</sup> Xiaobo Xu,<sup>†</sup> and Yafei Ji<sup>†\*</sup>

<sup>a</sup>Engineering Research Center of Pharmaceutical Process Chemistry, Ministry of Education; School of Pharmacy, East China University of Science and Technology, 130 Meilong Road, Shanghai 200237, P. R. China  
E-mail: jyf@ecust.edu.cn (Ji).

| <b>Table of contents:</b>                | <b>Page</b> |
|------------------------------------------|-------------|
| <b>1. General Experiment Information</b> | <b>1</b>    |
| <b>2. General Procedures</b>             | <b>1</b>    |
| <b>3. Characterization of Materials</b>  | <b>4</b>    |
| <b>4. Copies of NMR Spectra</b>          | <b>20</b>   |

## 1. General Experiment Information

All reagents were obtained from commercial sources and used as received without further purification unless otherwise stated. NMR spectra were recorded on a BrukerAvanceII 400 spectrometer and BrukerAvanceII 600 spectrometer in CDCl<sub>3</sub> with tetramethylsilane (TMS) as an internal standard; chemical shifts  $\delta$  were given in ppm and coupling constants  $J$  in Hz. HRMS were measured on a QSTAR Pulsar I LC/TOF MS mass spectrometer.

## 2. General Procedures

### 2.1 General procedure for Synthesis of various sulfonylhydrazone.

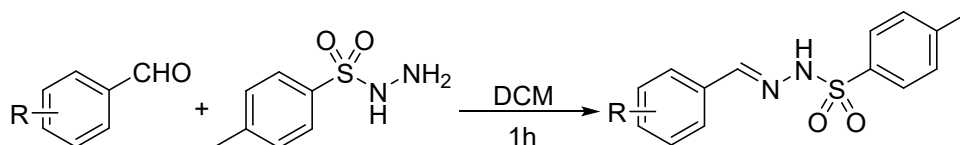

A mixture of hydrazine (6.0 mmol), aldehyde (5.0 mmol) and anhydrous MgSO<sub>4</sub> (1.25 g) in CH<sub>2</sub>Cl<sub>2</sub> (25 mL) was stirred 1h at room temperature. After filtration of MgSO<sub>4</sub>, CH<sub>2</sub>Cl<sub>2</sub> was removed under reduced pressure. The hydrazone, which was usually obtained in nearly quantitative yield, was used directly for the next step without further purification.

### 2.2 General procedure for Synthesis of pyrazole derivatives

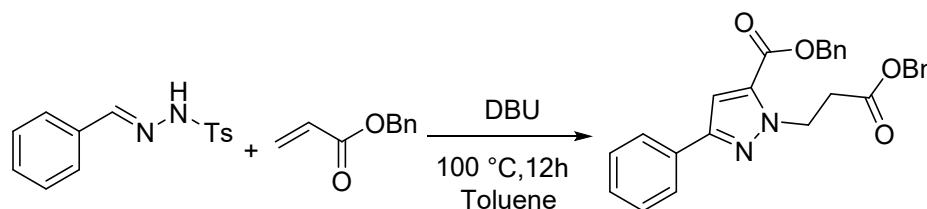

A mixture of substrates *p*-Toluenesulfonyl Hydrazone **1a** (0.2 mmol), Benzyl acrylate **2a** (0.44 mmol), DBU (2.0 equiv) in Toluene (2 mL) was charged in a round-bottom flask and stirred at 100 °C (oil bath) for 12 h. Upon completion of the reaction, water (20 mL) and DCM (10 mL) were added to the mixture, then the aqueous layer was extracted with DCM (100 mL  $\times$ 3). The combined organic layer was dried over anhydrous Na<sub>2</sub>SO<sub>4</sub>. Finally, the solution was concentrated in vacuo to provide a crude product, which was further purified via a column chromatography on silica gel (eluent: petroleum ether/ethyl acetate = 20:1 to 15:1) to supply the desired products **3a** as a yellow oil.

### 2.3 Single crystal structure of **2b**

Empiric

al

formula

Formul

a

weight

Temperature

Wavelength

Crystal system

Space group

Unit cell dimensions

Volume

Z

Density (calculated)

Absorption coefficient

F(000)

Crystal size

Theta range for data collection

Index ranges

Reflections collected

Independent reflections

Completeness to theta = 67.679°

Refinement method

Data / restraints / parameters

Goodness-of-fit on F<sup>2</sup>

Final R indices [I > 2σ(I)]

R indices (all data)

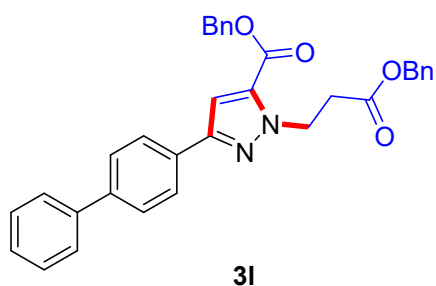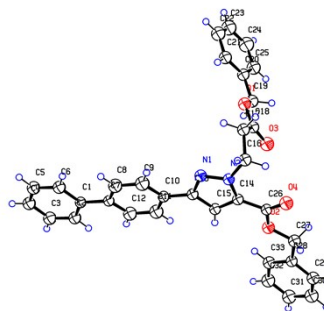

X-ray Single crystal structure of **31**  
516.57

200(2) K

1.54178 Å

Monoclinic

P2<sub>1</sub>/n

a = 20.6627(8) Å

α = 90°.

b = 5.9304(2) Å

β = 114.2360(10)°.

c = 23.2569(9) Å

γ = 90°.

2598.68(17) Å<sup>3</sup>

4

1.320 Mg/m<sup>3</sup>

0.700 mm<sup>-1</sup>

1088

0.15 x 0.09 x 0.01 mm<sup>3</sup>

2.414 to 68.275°.

-24 ≤ h ≤ 24, -7 ≤ k ≤ 5, -28 ≤ l ≤ 27

30322

4701 [R(int) = 0.0508]

99.2 %

Full-matrix least-squares on F<sup>2</sup>

4701 / 216 / 396

1.098

R1 = 0.0370, wR2 = 0.0944

R1 = 0.0463, wR2 = 0.0968

Extinction coefficient 0.0220(6)

Largest diff. peak and hole 0.180 and -0.174 e.Å<sup>-3</sup>

### 3. Characterization of Materials

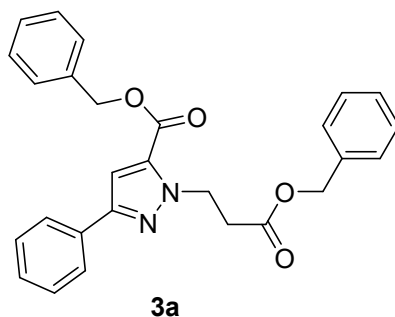

**Benzyl 1-(3-(benzyloxy)-3-oxopropyl)-3-phenyl-1H-pyrazole-5-carboxylate (3a):** Compound **3a** was isolated as a yellow oil (66.1mg, 75%) by a column chromatography on silica gel (eluent: petroleum ether/ethyl acetate = 15:1). <sup>1</sup>H NMR (400 MHz, CDCl<sub>3</sub>) δ 7.81 (d, *J* = 7.3 Hz, 2H), 7.51 – 7.43 (m, 4H), 7.42 (d, *J* = 7.6 Hz, 3H), 7.40 – 7.31 (m, 6H), 7.18 (s, 1H), 5.38 (s, 2H), 5.17 (s, 2H), 4.97 (t, *J* = 7.1 Hz, 2H), 3.06 (t, *J* = 7.1 Hz, 2H). <sup>13</sup>C NMR (150 MHz, CDCl<sub>3</sub>) δ 170.81, 159.59, 150.35, 135.80, 135.49, 133.32, 132.51, 128.85, 128.80, 128.67, 128.48, 128.36, 128.22, 125.68, 108.52, 66.95, 66.69, 47.42, 34.93. HRMS (EI): *m/z* [M]<sup>+</sup> calcd. for C<sub>27</sub>H<sub>24</sub>N<sub>2</sub>O<sub>4</sub>: 440.1736. Found: 440.1739.

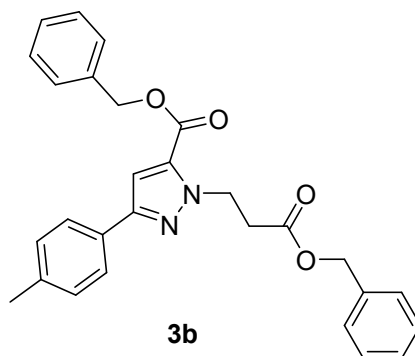

**Benzyl 1-(3-(benzyloxy)-3-oxopropyl)-3-(*p*-tolyl)-1H-pyrazole-5-carboxylate (3b):** Compound **3b** was isolated as a yellow oil (66.4mg, 73%) by a column chromatography on silica gel (eluent: petroleum ether/ethyl acetate = 15:1). <sup>1</sup>H NMR (400 MHz, CDCl<sub>3</sub>) δ 7.58 (d, *J* = 8.1 Hz, 2H), 7.39 – 7.27 (m, 5H), 7.26 – 7.21 (m, 5H), 7.11 (d, *J* = 7.9 Hz, 2H), 7.03 (s, 1H), 5.25 (s, 2H), 5.04 (s, 2H), 4.85 (t, *J* = 7.2 Hz, 2H), 2.94 (t, *J* = 7.2 Hz, 2H), 2.29 (s, 3H). <sup>13</sup>C NMR (150 MHz, CDCl<sub>3</sub>) δ 170.83, 159.62, 150.44, 138.06, 135.82, 135.51, 133.21, 129.71, 129.50, 128.84, 128.66, 128.48, 128.37, 125.59, 108.30, 66.92, 66.68, 47.37, 34.97, 21.41. HRMS (EI): *m/z* [M]<sup>+</sup> calcd. for C<sub>28</sub>H<sub>26</sub>N<sub>2</sub>O<sub>4</sub>: 454.1893. Found: 454.1896.

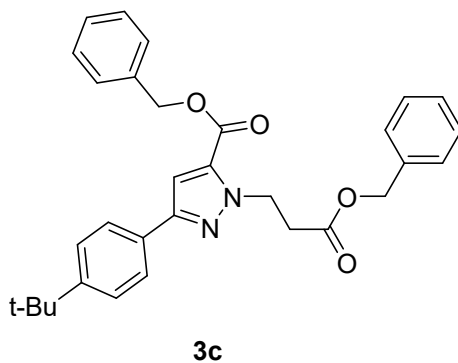

**Benzyl 1-(3-(benzyloxy)-3-oxopropyl)-3-(4-(tert-butyl)phenyl)-1H-pyrazole-5-carboxylate (3c):**

Compound **3c** was isolated as a white solid (67.5mg, 68%) by a column chromatography on silica gel (eluents: petroleum ether/ethyl acetate = 15:1), m.p. 93.5–94.2 °C. <sup>1</sup>H NMR (400 MHz, CDCl<sub>3</sub>) δ 7.74 (d, *J* = 8.4 Hz, 2H), 7.49 (d, *J* = 7.4 Hz, 2H), 7.47 – 7.40 (m, 5H), 7.39 – 7.32 (m, 5H), 7.17 (s, 1H), 5.38 (s, 2H), 5.17 (s, 2H), 4.97 (t, *J* = 7.2 Hz, 2H), 3.06 (t, *J* = 7.2 Hz, 2H), 1.39 (s, 9H). <sup>13</sup>C NMR (150 MHz, CDCl<sub>3</sub>) δ 170.83, 159.63, 151.28, 150.36, 135.82, 135.51, 133.19, 129.72, 128.83, 128.65, 128.47, 128.36, 128.33, 125.70, 125.42, 108.33, 66.90, 66.65, 47.36, 34.94, 34.75, 31.42. HRMS (EI): *m/z* [M]<sup>+</sup> calcd. for C<sub>31</sub>H<sub>32</sub>N<sub>2</sub>O<sub>4</sub>: 496.2362. Found: 496.2363.

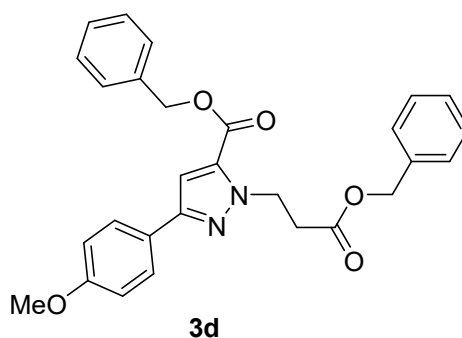

**Benzyl 1-(3-(benzyloxy)-3-oxopropyl)-3-(4-methoxyphenyl)-1H-pyrazole-5-carboxylate (3d):**

Compound **3d** was isolated as a yellow oil (62.1mg, 66%) by a column chromatography on silica gel (eluents: petroleum ether/ethyl acetate = 15:1). <sup>1</sup>H NMR (400 MHz, CDCl<sub>3</sub>) δ 7.77 – 7.60 (m, 2H), 7.46 – 7.33 (m, 5H), 7.34 – 7.27 (m, 5H), 7.06 (s, 1H), 7.00 – 6.86 (m, 2H), 5.33 (s, 2H), 5.12 (s, 2H), 4.91 (t, *J* = 7.2 Hz, 2H), 3.83 (s, 3H), 3.00 (t, *J* = 7.2 Hz, 2H). <sup>13</sup>C NMR (150 MHz, CDCl<sub>3</sub>) δ 170.85, 159.75, 159.64, 150.23, 135.83, 135.53, 133.21, 128.84, 128.67, 128.47, 128.37, 126.97, 125.34, 114.20, 107.97, 66.91, 66.67, 55.45, 47.32, 34.98. HRMS (EI): *m/z* [M]<sup>+</sup> calcd. for C<sub>28</sub>H<sub>26</sub>N<sub>2</sub>O<sub>5</sub>: 470.1842. Found: 470.1840.

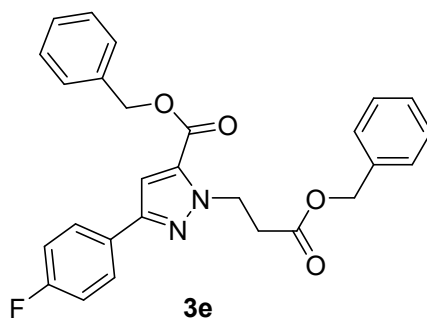

**Benzyl 1-(3-(benzyloxy)-3-oxopropyl)-3-(4-fluorophenyl)-1H-pyrazole-5-carboxylate (3e):**

Compound **3e** was isolated as a yellow oil (58.7mg, 64%) by a column chromatography on silica gel (eluent: petroleum ether/ethyl acetate = 15:1). <sup>1</sup>H NMR (400 MHz, CDCl<sub>3</sub>) δ 7.72 (dd, *J* = 8.7, 5.4 Hz, 2H), 7.41 (dt, *J* = 15.9, 8.0 Hz, 5H), 7.36 – 7.27 (m, 5H), 7.11 – 7.03 (m, 3H), 5.33 (s, 2H), 5.12 (s, 2H), 4.92 (t, *J* = 7.1 Hz, 2H), 3.01 (t, *J* = 7.1 Hz, 2H). <sup>13</sup>C NMR (150 MHz, CDCl<sub>3</sub>) δ 170.81, 163.67 (d, *J* = 224.5 Hz), 162.04 (d, *J* = 224.5 Hz), 159.52, 149.45, 135.76, 135.42 (d, *J* = 51 Hz), 133.43 (d, *J* = 51 Hz), 128.85, 128.71, 128.67, 128.49, 128.40, 128.36, 127.41 (d, *J* = 9 Hz), 127.35 (d, *J* = 9 Hz), 115.81 (d, *J* = 22.5 Hz), 115.66 (d, *J* = 22.5 Hz), 108.27, 67.00, 66.70, 47.40, 34.89. HRMS (EI): *m/z* [M]<sup>+</sup> calcd. for C<sub>27</sub>H<sub>23</sub>FN<sub>2</sub>O<sub>4</sub>: 458.1642. Found: 458.1645.

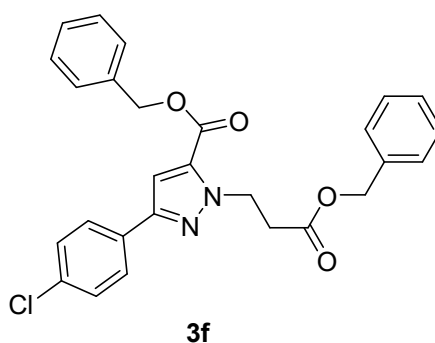

**Benzyl 1-(3-(benzyloxy)-3-oxopropyl)-3-(4-chlorophenyl)-1H-pyrazole-5-carboxylate (3f):**

Compound **3f** was isolated as a yellow oil (61.7mg, 65%) by a column chromatography on silica gel (eluent: petroleum ether/ethyl acetate = 15:1), m.p. 63.0–63.6 °C. <sup>1</sup>H NMR (400 MHz, CDCl<sub>3</sub>) δ 7.74 (d, *J* = 8.5 Hz, 2H), 7.52 – 7.40 (m, 6H), 7.40 – 7.33 (m, 6H), 7.16 (s, 1H), 5.39 (s, 2H), 5.17 (s, 2H), 4.98 (t, *J* = 7.1 Hz, 2H), 3.07 (t, *J* = 7.1 Hz, 2H). <sup>13</sup>C NMR (150 MHz, CDCl<sub>3</sub>) δ 170.71, 159.39, 149.14, 135.71, 135.35, 133.91, 133.44, 130.98, 128.92, 128.81, 128.67, 128.62, 128.46, 128.35, 128.30, 126.86, 108.39, 66.98, 66.65, 47.41, 34.79. HRMS (EI): *m/z* [M]<sup>+</sup> calcd. for C<sub>27</sub>H<sub>23</sub>ClN<sub>2</sub>O<sub>4</sub>: 474.1346. Found: 474.1347.

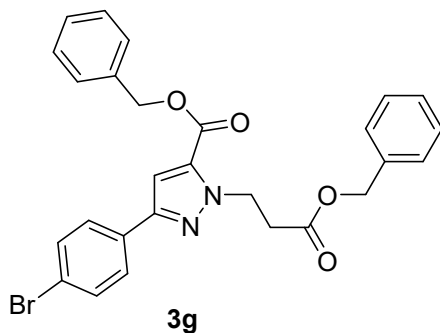

**Benzyl 1-(3-(benzyloxy)-3-oxopropyl)-3-(4-bromophenyl)-1H-pyrazole-5-carboxylate (3g):**

Compound **3g** was isolated as a white solid (72.7mg, 70%) by a column chromatography on silica gel (eluent: petroleum ether/ethyl acetate = 15:1), m.p. 73.0–73.5 °C. <sup>1</sup>H NMR (400 MHz, CDCl<sub>3</sub>) δ 7.62 (d, *J* = 8.5 Hz, 2H), 7.49 (d, *J* = 8.5 Hz, 2H), 7.46 – 7.34 (m, 5H), 7.35 – 7.27 (m, 5H), 7.10 (s, 1H), 5.33 (s, 2H), 5.11 (s, 2H), 4.91 (t, *J* = 7.1 Hz, 2H), 3.00 (t, *J* = 7.1 Hz, 2H). <sup>13</sup>C NMR (150 MHz, CDCl<sub>3</sub>) δ 170.78, 159.47, 149.25, 135.75, 135.39, 133.53, 131.94, 131.49, 128.87, 128.74, 128.68, 128.53, 128.43, 128.38, 127.22, 122.18, 108.46, 67.06, 66.73, 47.49, 34.87. HRMS (EI): *m/z* [M]<sup>+</sup> calcd. for C<sub>27</sub>H<sub>23</sub>BrN<sub>2</sub>O<sub>4</sub>: 518.0841. Found: 518.0843.

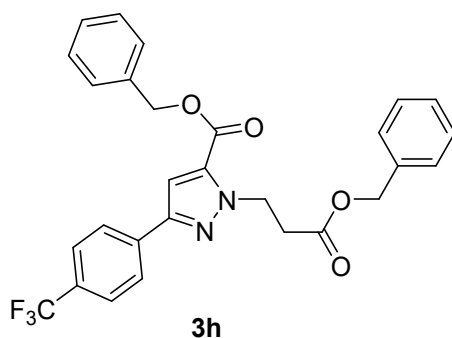

**Benzyl 1-(3-(benzyloxy)-3-oxopropyl)-3-(4-(trifluoromethyl)phenyl)-1H-pyrazole-5-carboxylate (3h):**

Compound **3h** was isolated as a white solid (71.2mg, 70%) by a column chromatography on silica gel (eluent: petroleum ether/ethyl acetate = 15:1), m.p. 80.9–81.4 °C. <sup>1</sup>H NMR (400 MHz, CDCl<sub>3</sub>) δ 7.95 (d, *J* = 8.0 Hz, 2H), 7.71 (d, *J* = 8.1 Hz, 2H), 7.57 – 7.43 (m, 5H), 7.43–7.35 (m, 5H), 7.27 (s, 1H), 5.44 (s, 2H), 5.21 (s, 2H), 5.03 (t, *J* = 7.0 Hz, 2H), 3.12 (t, *J* = 7.0 Hz, 2H). <sup>13</sup>C NMR (150 MHz, CDCl<sub>3</sub>) δ 170.72, 159.39, 148.83, 135.90, 135.74, 135.35, 133.71, 130.33 (q, *J* = 33 Hz), 130.11 (q, *J* = 33 Hz), 129.90 (q, *J* = 33 Hz), 129.68 (q, *J* = 33 Hz), 128.88, 128.77, 128.67, 128.56, 128.42, 128.38, 127.01 (q, *J* = 270 Hz), 125.79, 125.21 (q, *J* = 270 Hz), 123.41 (q, *J* = 270 Hz), 121.61 (q, *J* = 270 Hz), 108.91, 67.13, 66.73, 47.59, 34.81. HRMS (EI): *m/z* [M]<sup>+</sup> calcd. for C<sub>28</sub>H<sub>23</sub>F<sub>3</sub>N<sub>2</sub>O<sub>4</sub>: 508.1610. Found: 508.1614.

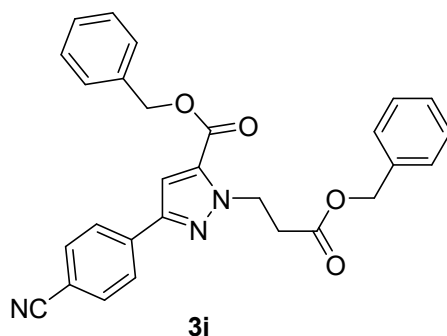

**Benzyl 1-(3-(benzyloxy)-3-oxopropyl)-3-(4-cyanophenyl)-1H-pyrazole-5-carboxylate (3i):**

Compound **3i** was isolated as a white solid (37.2mg, 40%) by a column chromatography on silica gel (eluents: petroleum ether/ethyl acetate = 15:1), m.p. 112.5–113.2 °C. <sup>1</sup>H NMR (400 MHz, CDCl<sub>3</sub>) δ 7.89 (d, *J* = 8.2 Hz, 2H), 7.70 (d, *J* = 8.2 Hz, 2H), 7.53 – 7.38 (m, 5H), 7.40 – 7.31 (m, 5H), 7.23 (s, 1H), 5.39 (s, 2H), 5.16 (s, 2H), 4.98 (t, *J* = 7.0 Hz, 2H), 3.07 (t, *J* = 7.0 Hz, 2H). <sup>13</sup>C NMR (150 MHz, CDCl<sub>3</sub>) δ 170.67, 159.28, 148.29, 136.82, 135.71, 135.26, 133.93, 132.68, 128.89, 128.81, 128.68, 128.57, 128.45, 128.36, 126.03, 111.49, 109.13, 67.21, 66.76, 47.68, 34.73. HRMS (EI): *m/z* [M]<sup>+</sup> calcd. for C<sub>28</sub>H<sub>23</sub>N<sub>3</sub>O<sub>4</sub>: 465.1689. Found: 465.1686.

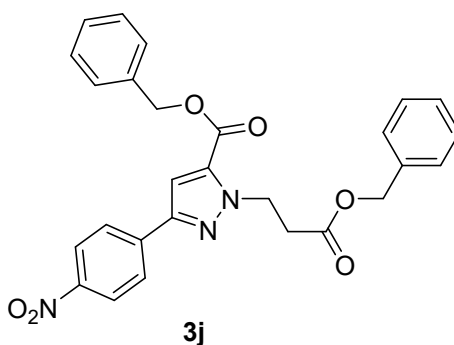

**Benzyl 1-(3-(benzyloxy)-3-oxopropyl)-3-(3-nitrophenyl)-1H-pyrazole-5-carboxylate (3j):**

Compound **3j** was isolated as a yellow solid (58.3mg, 60%) by a column chromatography on silica gel (eluents: petroleum ether/ethyl acetate = 15:1), m.p. 143.1–143.5 °C. <sup>1</sup>H NMR (400 MHz, CDCl<sub>3</sub>) δ 8.27 (d, *J* = 8.8 Hz, 2H), 7.94 (d, *J* = 8.8 Hz, 2H), 7.53 – 7.39 (m, 5H), 7.39 – 7.32 (m, 5H), 7.27 (s, 1H), 5.40 (s, 2H), 5.17 (s, 2H), 5.00 (t, *J* = 7.0 Hz, 2H), 3.08 (t, *J* = 7.0 Hz, 2H). <sup>13</sup>C NMR (150 MHz, CDCl<sub>3</sub>) δ 170.61, 159.19, 147.87, 147.39, 138.64, 135.67, 135.21, 134.01, 128.86, 128.79, 128.65, 128.55, 128.42, 128.34, 126.05, 124.20, 109.38, 67.21, 66.72, 47.70, 34.66. HRMS (EI): *m/z* [M]<sup>+</sup> calcd. for C<sub>27</sub>H<sub>23</sub>N<sub>3</sub>O<sub>6</sub>: 485.1587. Found: 485.1591.



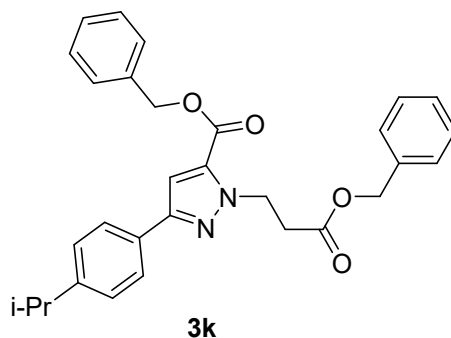

**Benzyl 1-(3-(benzyloxy)-3-oxopropyl)-3-(4-isopropylphenyl)-1H-pyrazole-5-carboxylate (3k):**

Compound **3k** was isolated as a yellow oil (66.6mg, 69%) by a column chromatography on silica gel (eluents: petroleum ether/ethyl acetate = 15:1). <sup>1</sup>H NMR (400 MHz, CDCl<sub>3</sub>) δ 7.73 (d, *J* = 8.1 Hz, 2H), 7.52 – 7.38 (m, 5H), 7.39 – 7.32 (m, 5H), 7.29 (d, *J* = 7.3 Hz, 2H), 7.15 (s, 1H), 5.38 (s, 2H), 5.16 (s, 2H), 4.97 (t, *J* = 7.2 Hz, 2H), 3.05 (t, *J* = 7.2 Hz, 2H), 2.97 (dt, *J* = 13.8, 6.9 Hz, 1H), 1.31 (d, *J* = 6.9 Hz, 6H). <sup>13</sup>C NMR (150 MHz, CDCl<sub>3</sub>) δ 170.84, 159.64, 150.46, 149.06, 135.81, 135.52, 133.19, 130.11, 128.84, 128.65, 128.48, 128.36, 126.86, 125.69, 108.32, 66.91, 66.67, 47.36, 34.96, 34.05, 24.06. HRMS (EI): *m/z* [M]<sup>+</sup> calcd. for C<sub>30</sub>H<sub>30</sub>N<sub>2</sub>O<sub>4</sub>: 482.2206. Found: 482.2205.

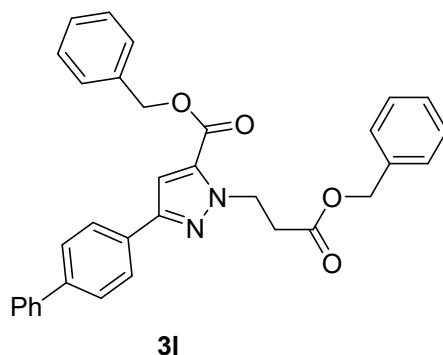

**Benzyl 3-([1,1'-biphenyl]-4-yl)-1-(3-(benzyloxy)-3-oxopropyl)-1H-pyrazole-5-carboxylate (3l):**

Compound **3l** was isolated as a white solid (62.0mg, 60%) by a column chromatography on silica gel (eluents: petroleum ether/ethyl acetate = 15:1), m.p. 129.9–130.5 °C. <sup>1</sup>H NMR (400 MHz, CDCl<sub>3</sub>) δ 7.90 (d, *J* = 8.3 Hz, 2H), 7.69 (d, *J* = 8.0 Hz, 4H), 7.54 – 7.45 (m, 6H), 7.43 (dd, *J* = 11.2, 4.8 Hz, 2H), 7.40 – 7.33 (m, 5H), 7.24 (s, 1H), 5.41 (s, 2H), 5.19 (s, 2H), 5.01 (t, *J* = 7.1 Hz, 2H), 3.10 (t, *J* = 7.1 Hz, 2H). <sup>13</sup>C NMR (150 MHz, CDCl<sub>3</sub>) δ 170.79, 159.55, 149.97, 140.92, 140.77, 135.78, 135.46, 133.35, 131.47, 128.91, 128.83, 128.66, 128.65, 128.48, 128.35, 127.47, 127.09, 126.05, 108.53, 66.95, 66.67, 47.43, 34.91. HRMS (EI): *m/z* [M]<sup>+</sup> calcd. for C<sub>33</sub>H<sub>28</sub>N<sub>2</sub>O<sub>4</sub>: 516.2049. Found: 516.2053.

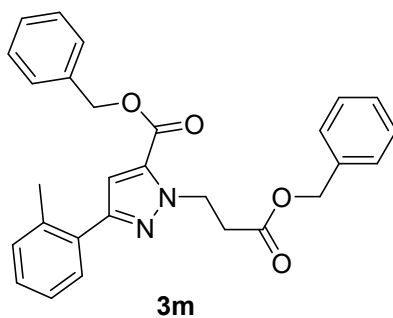

**Benzyl 1-(3-(benzyloxy)-3-oxopropyl)-3-(*o*-tolyl)-1*H*-pyrazole-5-carboxylate (3m):** Compound **3m** was isolated as a yellow oil (38.2mg, 42%) by a column chromatography on silica gel (eluent: petroleum ether/ethyl acetate = 15:1). <sup>1</sup>H NMR (400 MHz, CDCl<sub>3</sub>) δ 7.53 (d, *J* = 6.6 Hz, 1H), 7.43 (ddd, *J* = 16.4, 10.0, 6.9 Hz, 5H), 7.33 (d, *J* = 12.1 Hz, 5H), 7.25 (dt, *J* = 8.9, 4.0 Hz, 3H), 7.04 (s, 1H), 5.37 (s, 2H), 5.15 (s, 2H), 4.97 (t, *J* = 7.1 Hz, 2H), 3.05 (t, *J* = 7.1 Hz, 2H), 2.48 (s, 3H). <sup>13</sup>C NMR (150 MHz, CDCl<sub>3</sub>) δ 170.83, 159.72, 150.79, 136.19, 135.80, 135.54, 132.54, 132.19, 131.03, 129.25, 128.84, 128.66, 128.47, 128.37, 128.16, 126.00, 111.52, 66.90, 66.69, 47.29, 34.88, 21.35. HRMS (EI): *m/z* [M]<sup>+</sup> calcd. for C<sub>28</sub>H<sub>26</sub>N<sub>2</sub>O<sub>4</sub>: 454.1893. Found: 454.1896.

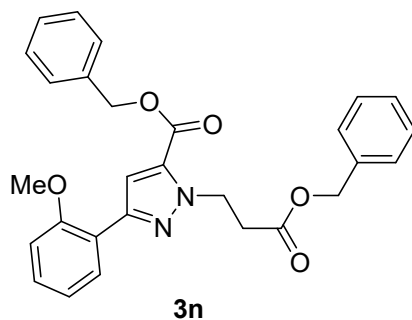

**Benzyl 1-(3-(benzyloxy)-3-oxopropyl)-3-(2-methoxyphenyl)-1*H*-pyrazole-5-carboxylate (3n):** Compound **3n** was isolated as a yellow oil (35.8mg, 38%) by a column chromatography on silica gel (eluent: petroleum ether/ethyl acetate = 15:1). <sup>1</sup>H NMR (400 MHz, CDCl<sub>3</sub>) δ 7.96 (d, *J* = 7.6 Hz, 1H), 7.48 (d, *J* = 7.3 Hz, 2H), 7.46 – 7.38 (m, 4H), 7.38 – 7.31 (m, 6H), 7.02 (dd, *J* = 15.4, 7.9 Hz, 2H), 5.39 (s, 2H), 5.16 (s, 2H), 4.98 (t, *J* = 7.2 Hz, 2H), 3.94 (s, 3H), 3.05 (t, *J* = 7.2 Hz, 2H). <sup>13</sup>C NMR (150 MHz, CDCl<sub>3</sub>) δ 170.85, 159.86, 156.87, 147.18, 135.84, 135.69, 129.39, 128.80, 128.70, 128.67, 128.57, 128.44, 128.37, 121.26, 120.96, 112.75, 111.34, 66.80, 66.67, 55.64, 47.41, 35.01. HRMS (EI): *m/z* [M]<sup>+</sup> calcd. for C<sub>28</sub>H<sub>26</sub>N<sub>2</sub>O<sub>5</sub>: 470.1842. Found: 470.1844.

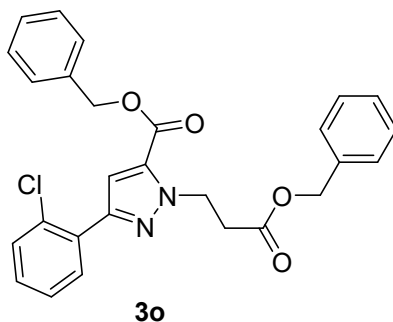

**Benzyl 1-(3-(benzyloxy)-3-oxopropyl)-3-(2-chlorophenyl)-1H-pyrazole-5-carboxylate (3o):**

Compound **3o** was isolated as a yellow oil (47.5mg, 50%) by a column chromatography on silica gel (eluents: petroleum ether/ethyl acetate = 15:1). <sup>1</sup>H NMR (400 MHz, CDCl<sub>3</sub>) δ 7.96 – 7.69 (m, 1H), 7.46 (dd, *J* = 9.7, 4.7 Hz, 3H), 7.44 – 7.37 (m, 4H), 7.37-7.32 (m, 5H), 7.31 (dd, *J* = 7.1, 3.1 Hz, 2H), 5.38 (s, 2H), 5.16 (s, 2H), 4.99 (t, *J* = 7.2 Hz, 2H), 3.06 (t, *J* = 7.2 Hz, 2H). <sup>13</sup>C NMR (150 MHz, CDCl<sub>3</sub>) δ 170.76, 159.63, 147.89, 135.78, 135.50, 132.64, 132.30, 131.39, 130.56, 130.46, 129.29, 128.83, 128.67, 128.65, 128.47, 128.39, 128.37, 127.03, 112.57, 66.96, 66.71, 47.47, 34.90. HRMS (EI): *m/z* [M]<sup>+</sup> calcd. for C<sub>27</sub>H<sub>23</sub>ClN<sub>2</sub>O<sub>4</sub>: 474.1346. Found: 474.1342.

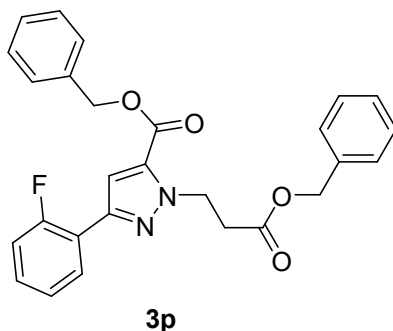

**Benzyl 1-(3-(benzyloxy)-3-oxopropyl)-3-(2-fluorophenyl)-1H-pyrazole-5-carboxylate (3p):**

Compound **3p** was isolated as a yellow solid (53.2mg, 58%) by a column chromatography on silica gel (eluents: petroleum ether/ethyl acetate = 15:1), m.p. 61.8–62.3 °C. <sup>1</sup>H NMR (400 MHz, CDCl<sub>3</sub>) δ 8.02 (td, *J* = 7.7, 1.2 Hz, 1H), 7.53 – 7.38 (m, 5H), 7.39 – 7.29 (m, 7H), 7.18 (dt, *J* = 10.9, 8.0 Hz, 2H), 5.39 (s, 2H), 5.18 (s, 2H), 5.00 (t, *J* = 7.1 Hz, 2H), 3.07 (t, *J* = 7.1 Hz, 2H). <sup>13</sup>C NMR (150 MHz, CDCl<sub>3</sub>) δ 170.77, 160.98 (d, *J* = 249 Hz), 159.62, 159.32 (d, *J* = 249 Hz), 144.89, 135.77, 135.48, 133.11, 129.59 (d, *J* = 7.5 Hz), 129.54 (d, *J* = 7.5 Hz), 128.82, 128.65, 128.45, 128.35, 124.43 (d, *J* = 3 Hz), 124.41 (d, *J* = 3 Hz), 120.42 (d, *J* = 12 Hz), 120.34 (d, *J* = 12 Hz), 116.25 (d, *J* = 22.5 Hz), 116.10 (d, *J* = 22.5 Hz), 112.06 (d, *J* = 9 Hz), 112.00 (d, *J* = 9 Hz), 66.93, 66.70, 47.49, 34.88. HRMS (EI): *m/z* [M]<sup>+</sup> calcd. for C<sub>27</sub>H<sub>23</sub>FN<sub>2</sub>O<sub>4</sub>: 458.1642. Found: 458.1647.

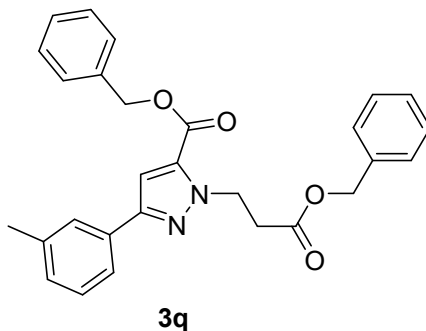

**Benzyl 1-(3-(benzyloxy)-3-oxopropyl)-3-(*m*-tolyl)-1*H*-pyrazole-5-carboxylate (3q):** Compound **3q** was isolated as a white solid (61.8mg, 68%) by a column chromatography on silica gel (eluents: petroleum ether/ethyl acetate = 15:1), m.p. 67.2–68.1 °C. <sup>1</sup>H NMR (400 MHz, CDCl<sub>3</sub>) δ 7.66 (s, 1H), 7.60 (d, *J* = 7.6 Hz, 1H), 7.53 – 7.39 (m, 5H), 7.35 (d, *J* = 8.0 Hz, 5H), 7.31 (d, *J* = 8.8 Hz, 1H), 7.16 (d, *J* = 15.4 Hz, 2H), 5.38 (s, 2H), 5.17 (s, 2H), 4.98 (t, *J* = 7.0 Hz, 2H), 3.07 (t, *J* = 7.0 Hz, 2H), 2.43 (s, 3H). <sup>13</sup>C NMR (150 MHz, CDCl<sub>3</sub>) δ 170.79, 159.59, 150.49, 138.42, 135.78, 135.48, 133.23, 132.37, 129.00, 128.82, 128.70, 128.65, 128.47, 128.34, 126.31, 122.84, 108.55, 66.92, 66.66, 47.39, 34.96, 21.56. HRMS (EI): *m/z* [M]<sup>+</sup> calcd. for C<sub>28</sub>H<sub>26</sub>N<sub>2</sub>O<sub>4</sub>: 454.1893. Found: 454.1896.

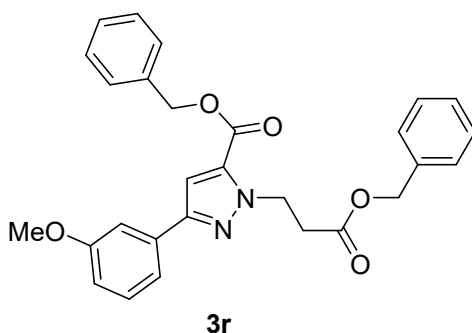

**Benzyl 1-(3-(benzyloxy)-3-oxopropyl)-3-(3-methoxyphenyl)-1*H*-pyrazole-5-carboxylate (3r):** Compound **3r** was isolated as a yellow oil (61.2mg, 65%) by a column chromatography on silica gel (eluents: petroleum ether/ethyl acetate = 15:1). <sup>1</sup>H NMR (400 MHz, CDCl<sub>3</sub>) δ 7.45 (dt, *J* = 9.7, 4.8 Hz, 4H), 7.41 – 7.31 (m, 8H), 7.30 (s, 1H), 7.17 (s, 1H), 6.96 – 6.83 (m, 1H), 5.38 (s, 2H), 5.16 (s, 2H), 4.97 (t, *J* = 7.2 Hz, 2H), 3.88 (s, 3H), 3.06 (t, *J* = 7.2 Hz, 2H). <sup>13</sup>C NMR (150 MHz, CDCl<sub>3</sub>) δ 170.79, 160.09, 159.54, 150.19, 135.79, 135.45, 133.72, 133.39, 129.87, 128.86, 128.71, 128.68, 128.51, 128.39, 128.37, 118.27, 114.36, 110.84, 108.68, 67.01, 66.72, 55.48, 47.43, 34.97. HRMS (EI): *m/z* [M]<sup>+</sup> calcd. for C<sub>28</sub>H<sub>26</sub>N<sub>2</sub>O<sub>5</sub>: 470.1842. Found: 470.1845.

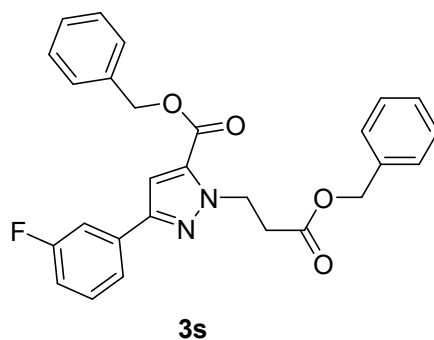

**Benzyl 1-(3-(benzyloxy)-3-oxopropyl)-3-(3-fluorophenyl)-1H-pyrazole-5-carboxylate (3s):**

Compound **3s** was isolated as a white solid (59.6mg, 65%) by a column chromatography on silica gel (eluents: petroleum ether/ethyl acetate = 15:1), m.p. 88.4–89.1 °C. <sup>1</sup>H NMR (400 MHz, CDCl<sub>3</sub>) δ 7.57 (d, *J* = 7.8 Hz, 1H), 7.53 (dd, *J* = 9.8, 1.9 Hz, 1H), 7.51 – 7.37 (m, 6H), 7.38 – 7.33 (m, 5H), 7.17 (s, 1H), 7.05 (td, *J* = 8.4, 2.1 Hz, 1H), 5.39 (s, 2H), 5.18 (s, 2H), 4.98 (t, *J* = 7.1 Hz, 2H), 3.07 (t, *J* = 7.1 Hz, 2H). <sup>13</sup>C NMR (150 MHz, CDCl<sub>3</sub>) δ 170.73, 164.07 (d, *J* = 243 Hz), 162.45 (d, *J* = 243 Hz), 159.42, 149.14, 135.73, 135.38, 134.74 (d, *J* = 9 Hz), 134.68 (d, *J* = 9 Hz), 133.50, 130.34 (d, *J* = 9 Hz), 130.28 (d, *J* = 9 Hz), 128.84, 128.70, 128.64, 128.48, 128.37, 128.35, 121.27 (d, *J* = 1.5 Hz), 121.26 (d, *J* = 1.5 Hz), 115.04 (d, *J* = 21 Hz), 114.90 (d, *J* = 21 Hz), 112.61 (d, *J* = 22.5 Hz), 112.46 (d, *J* = 22.5 Hz), 108.65, 67.01, 66.70, 47.47, 34.80. HRMS (EI): *m/z* [M]<sup>+</sup> calcd. for C<sub>27</sub>H<sub>23</sub>FN<sub>2</sub>O<sub>4</sub>: 458.1642. Found: 458.1644.

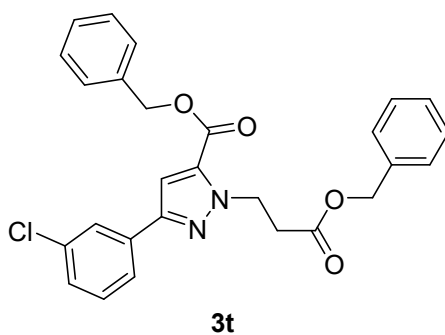

**Benzyl 1-(3-(benzyloxy)-3-oxopropyl)-3-(3-chlorophenyl)-1H-pyrazole-5-carboxylate (3t):**

Compound **3t** was isolated as a yellow oil (59.8mg, 63%) by a column chromatography on silica gel (eluents: petroleum ether/ethyl acetate = 15:1). <sup>1</sup>H NMR (400 MHz, CDCl<sub>3</sub>) δ 7.76 (s, 1H), 7.62 (dd, *J* = 8.2, 6.4 Hz, 1H), 7.49 – 7.35 (m, 5H), 7.36 – 7.22 (m, 7H), 7.12 (s, 1H), 5.33 (s, 2H), 5.12 (s, 2H), 4.92 (t, *J* = 7.1 Hz, 2H), 3.01 (t, *J* = 7.1 Hz, 2H). <sup>13</sup>C NMR (150 MHz, CDCl<sub>3</sub>) δ 170.76, 159.43, 148.97, 135.73, 135.37, 134.82, 134.29, 133.54, 130.08, 128.87, 128.73, 128.68, 128.52, 128.41, 128.38, 128.18, 125.75, 123.74, 108.66, 67.06, 66.75, 47.50, 34.84. HRMS (EI): *m/z* [M]<sup>+</sup> calcd. for C<sub>27</sub>H<sub>23</sub>ClN<sub>2</sub>O<sub>4</sub>:

474.1346. Found: 474.1342.

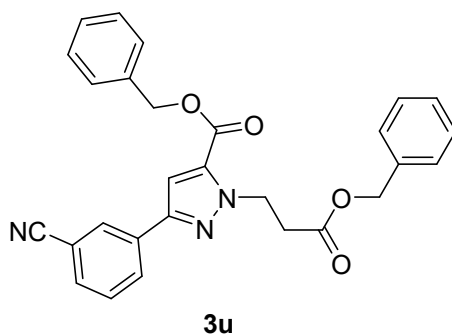

**Benzyl 1-(3-(benzyloxy)-3-oxopropyl)-3-(3-cyanophenyl)-1H-pyrazole-5-carboxylate (3u):**

Compound **3u** was isolated as a white solid (49.3mg, 53%) by a column chromatography on silica gel (eluents: petroleum ether/ethyl acetate = 15:1), m.p. 123.5–124.2 °C. <sup>1</sup>H NMR (400 MHz, CDCl<sub>3</sub>) δ 8.08 (s, 1H), 8.01 (d, *J* = 7.8 Hz, 1H), 7.62 (d, *J* = 7.6 Hz, 1H), 7.56 – 7.38 (m, 6H), 7.33 (d, *J* = 17.6 Hz, 5H), 7.20 (s, 1H), 5.39 (s, 2H), 5.17 (s, 2H), 4.98 (t, *J* = 6.9 Hz, 2H), 3.07 (t, *J* = 6.9 Hz, 2H). <sup>13</sup>C NMR (150 MHz, CDCl<sub>3</sub>) δ 170.63, 159.26, 148.02, 135.68, 135.26, 133.80, 131.43, 129.70, 129.61, 129.10, 128.86, 128.77, 128.65, 128.53, 128.41, 128.35, 118.76, 113.02, 108.61, 67.15, 66.73, 47.58, 34.73. HRMS (EI): *m/z* [M]<sup>+</sup> calcd. for C<sub>28</sub>H<sub>23</sub>N<sub>3</sub>O<sub>4</sub>: 465.1689. Found: 465.1692.

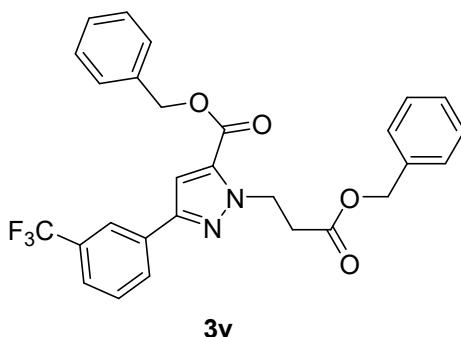

**Benzyl 1-(3-(benzyloxy)-3-oxopropyl)-3-(3-(trifluoromethyl)phenyl)-1H-pyrazole-5-carboxylate (3v):**

Compound **3v** was isolated as a white solid (66.1mg, 65%) by a column chromatography on silica gel (eluents: petroleum ether/ethyl acetate = 15:1), m.p. 76.9–77.5 °C. <sup>1</sup>H NMR (400 MHz, CDCl<sub>3</sub>) δ 8.08 (s, 1H), 7.99 (d, *J* = 7.7 Hz, 1H), 7.62 (d, *J* = 7.8 Hz, 1H), 7.55 (d, *J* = 7.7 Hz, 1H), 7.53 – 7.41 (m, 5H), 7.39 – 7.33 (m, 5H), 7.23 (s, 1H), 5.40 (s, 2H), 5.18 (s, 2H), 5.00 (t, *J* = 7.1 Hz, 2H), 3.09 (t, *J* = 7.1 Hz, 2H). <sup>13</sup>C NMR (150 MHz, CDCl<sub>3</sub>) δ 170.71, 159.39, 148.86, 135.72, 135.34, 133.68, 133.33, 131.53 (q, *J* = 33 Hz), 131.32 (q, *J* = 33 Hz), 131.10 (q, *J* = 33 Hz), 130.89 (q, *J* = 33 Hz), 129.27, 128.86, 128.78, 128.74, 128.64, 128.54, 128.39, 128.35, 126.93 (q, *J* = 270 Hz), 125.12 (q, *J* = 270 Hz), 124.76 (q, *J* = 4.5 Hz), 124.74 (q, *J* = 4.5 Hz), 124.71 (q, *J* = 4.5 Hz), 124.68 (q, *J* = 4.5 Hz), 123.32 (q, *J* = 270

(Hz), 122.44 (q,  $J = 3$  Hz), 122.42 (q,  $J = 3$  Hz), 122.40 (q,  $J = 3$  Hz), 122.37 (q,  $J = 3$  Hz), 121.51 (q,  $J = 270$  Hz), 108.62, 67.09, 66.72, 47.52, 34.83; HRMS (EI):  $m/z$   $[M]^+$  calcd. for  $C_{28}H_{23}F_3N_2O_4$ : 508.1610. Found: 508.1607.

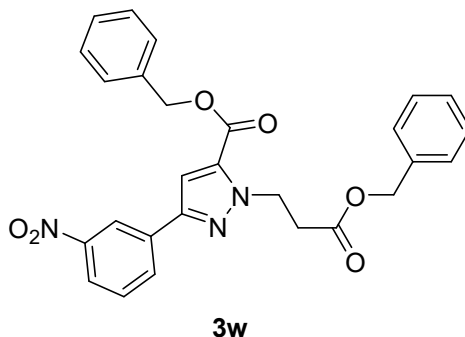

**Benzyl 1-(3-(benzyloxy)-3-oxopropyl)-3-(4-nitrophenyl)-1H-pyrazole-5-carboxylate (3w):**

Compound **3w** was isolated as a yellow solid (61.2mg, 63%) by a column chromatography on silica gel (eluent: petroleum ether/ethyl acetate = 15:1), m.p. 100.1–100.6 °C.  $^1H$  NMR (400 MHz,  $CDCl_3$ )  $\delta$  8.63 (s, 1H), 8.19 (dd,  $J = 8.2, 1.3$  Hz, 1H), 8.12 (d,  $J = 7.8$  Hz, 1H), 7.58 (t,  $J = 8.0$  Hz, 1H), 7.52 – 7.38 (m, 5H), 7.39 – 7.31 (m, 5H), 7.25 (s, 1H), 5.39 (s, 2H), 5.17 (s, 2H), 4.99 (t,  $J = 7.0$  Hz, 2H), 3.08 (t,  $J = 7.0$  Hz, 2H).  $^{13}C$  NMR (151 MHz,  $CDCl_3$ )  $\delta$  170.68, 159.28, 148.78, 147.93, 135.71, 135.26, 134.30, 133.94, 131.32, 129.77, 128.89, 128.79, 128.66, 128.56, 128.41, 128.38, 122.74, 120.46, 108.79, 67.19, 66.76, 47.61, 34.75. HRMS (EI):  $m/z$   $[M]^+$  calcd. for  $C_{27}H_{23}N_3O_6$ : 485.1587. Found: 485.1581.

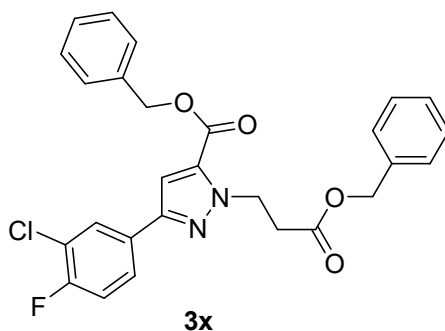

**Benzyl 1-(3-(benzyloxy)-3-oxopropyl)-3-(4-chloro-3-fluorophenyl)-1H-pyrazole-5-carboxylate (3x):**

Compound **3x** was isolated as a white solid (67.0mg, 68%) by a column chromatography on silica gel (eluent: petroleum ether/ethyl acetate = 15:1), m.p. 45.6–46.2 °C.  $^1H$  NMR (400 MHz,  $CDCl_3$ )  $\delta$  7.85 (dd,  $J = 7.0, 1.8$  Hz, 1H), 7.64 (ddd,  $J = 8.4, 4.4, 1.9$  Hz, 1H), 7.52 – 7.39 (m, 5H), 7.39 – 7.30 (m, 5H), 7.18 (t,  $J = 8.7$  Hz, 1H), 7.12 (s, 1H), 5.38 (s, 2H), 5.17 (s, 2H), 4.96 (t,  $J = 7.1$  Hz, 2H), 3.05 (t,  $J = 7.1$  Hz, 2H).  $^{13}C$  NMR (150 MHz,  $CDCl_3$ )  $\delta$  170.71, 159.36, 158.84 (d,  $J = 247.5$  Hz), 157.19 (d,  $J = 247.5$  Hz), 148.22, 135.72 (d,  $J = 58.5$  Hz), 135.33 (d,  $J = 58.5$  Hz), 133.65, 129.88 (d,  $J = 4.5$  Hz),

129.85 (d,  $J = 4.5$  Hz), 128.86, 128.75, 128.66, 128.53, 128.41, 128.36, 127.83, 125.37 (d,  $J = 6$  Hz), 125.33 (d,  $J = 6$  Hz), 121.55 (d,  $J = 18$  Hz), 121.43 (d,  $J = 18$  Hz), 116.98 (d,  $J = 22.5$  Hz), 116.83 (d,  $J = 22.5$  Hz), 108.37, 67.08, 66.73, 47.48, 34.81. HRMS (EI):  $m/z$   $[M]^+$  calcd. for  $C_{27}H_{22}ClFN_2O_4$ : 492.1252. Found: 492.1249.

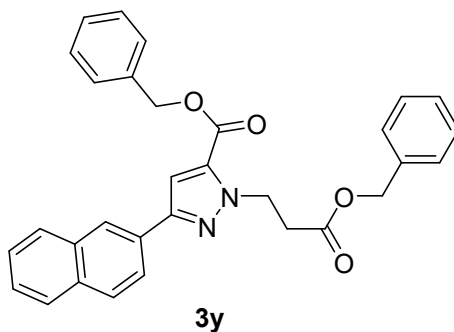

**Benzyl 1-(3-(benzyloxy)-3-oxopropyl)-3-(naphthalen-2-yl)-1H-pyrazole-5-carboxylate (3y):**

Compound **3y** was isolated as a yellow oil (54.0mg, 55%) by a column chromatography on silica gel (eluents: petroleum ether/ethyl acetate = 15:1).  $^1H$  NMR (400 MHz,  $CDCl_3$ )  $\delta$  8.48 (dd,  $J = 6.1, 3.4$  Hz, 1H), 7.93 (dd,  $J = 11.1, 5.6$  Hz, 2H), 7.68 (d,  $J = 7.1$  Hz, 1H), 7.60 – 7.52 (m, 3H), 7.50 (d,  $J = 6.9$  Hz, 2H), 7.48 – 7.39 (m, 3H), 7.39 – 7.31 (m, 5H), 7.22 (s, 1H), 5.42 (s, 2H), 5.18 (s, 2H), 5.08 (t,  $J = 7.1$  Hz, 2H), 3.13 (t,  $J = 7.1$  Hz, 2H).  $^{13}C$  NMR (150 MHz,  $CDCl_3$ )  $\delta$  170.80, 159.67, 150.34, 135.76, 135.48, 134.05, 132.81, 131.27, 130.41, 128.88, 128.84, 128.67, 128.65, 128.48, 128.38, 128.36, 127.31, 126.64, 126.01, 125.40, 112.33, 66.99, 66.72, 47.45, 35.02. HRMS (EI):  $m/z$   $[M]^+$  calcd. for  $C_{31}H_{26}N_2O_4$ : 490.1893. Found: 490.1895.

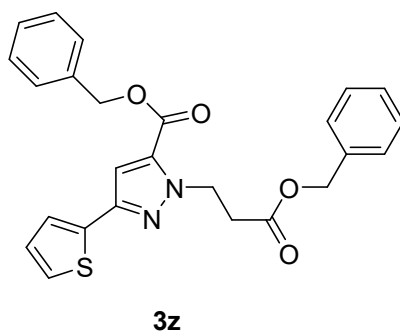

**Benzyl 1-(3-(benzyloxy)-3-oxopropyl)-3-(thiophen-2-yl)-1H-pyrazole-5-carboxylate (3z):**

Compound **3z** was isolated as a yellow solid (52.7mg, 59%) by a column chromatography on silica gel (eluents: petroleum ether/ethyl acetate = 15:1), m.p. 87.6–88.2 °C.  $^1H$  NMR (400 MHz,  $CDCl_3$ )  $\delta$  7.45 (dt,  $J = 16.2, 8.2$  Hz, 5H), 7.38 (d,  $J = 9.8$  Hz, 5H), 7.35 – 7.33 (m, 1H), 7.29 (d,  $J = 4.3$  Hz, 1H), 7.08 (dd,  $J = 6.1, 4.9$  Hz, 2H), 5.37 (s, 2H), 5.17 (s, 2H), 4.95 (t,  $J = 7.2$  Hz, 2H), 3.04 (t,  $J = 7.2$  Hz, 2H).  $^{13}C$



NMR (150 MHz, CDCl<sub>3</sub>)  $\delta$  170.69, 159.38, 145.80, 135.77, 135.58, 135.37, 133.28, 128.84, 128.69, 128.65, 128.48, 128.38, 128.36, 127.62, 125.10, 124.23, 108.30, 67.01, 66.70, 47.31, 34.92. HRMS (EI):  $m/z$  [M]<sup>+</sup> calcd. for C<sub>25</sub>H<sub>22</sub>N<sub>2</sub>O<sub>4</sub>S: 446.1300. Found: 446.1304.

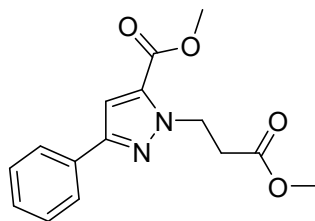

**4a**

**Methyl 1-(3-methoxy-3-oxopropyl)-3-phenyl-1H-pyrazole-5-carboxylate (4a):** Compound **4a** was isolated as a yellow oil (44.4mg, 77%) by a column chromatography on silica gel (eluents: petroleum ether/ethyl acetate = 15:1). <sup>1</sup>H NMR (400 MHz, CDCl<sub>3</sub>)  $\delta$  7.78 (d,  $J$  = 7.4 Hz, 2H), 7.40 (t,  $J$  = 7.5 Hz, 2H), 7.32 (t,  $J$  = 7.3 Hz, 1H), 7.12 (s, 1H), 4.90 (t,  $J$  = 7.3 Hz, 2H), 3.91 (s, 3H), 3.69 (s, 3H), 2.96 (t,  $J$  = 7.3 Hz, 2H). <sup>13</sup>C NMR (150 MHz, CDCl<sub>3</sub>)  $\delta$  171.37, 160.22, 150.32, 133.29, 132.52, 128.80, 128.21, 125.63, 108.28, 52.17, 51.96, 47.37, 34.77. HRMS (EI):  $m/z$  [M]<sup>+</sup> calcd. for C<sub>25</sub>H<sub>16</sub>N<sub>2</sub>O<sub>4</sub>: 288.1110. Found: 288.1107.

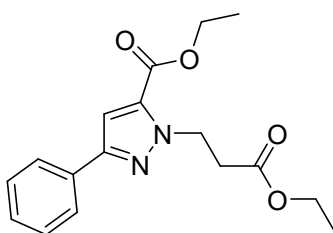

**4b**

**Ethyl 1-(3-ethoxy-3-oxopropyl)-3-phenyl-1H-pyrazole-5-carboxylate (4b):** Compound **4b** was isolated as a yellow oil (44.3mg, 70%) by a column chromatography on silica gel (eluents: petroleum ether/ethyl acetate = 15:1). <sup>1</sup>H NMR (400 MHz, CDCl<sub>3</sub>)  $\delta$  7.79 (d,  $J$  = 7.3 Hz, 2H), 7.40 (t,  $J$  = 7.5 Hz, 2H), 7.31 (t,  $J$  = 7.3 Hz, 1H), 7.13 (s, 1H), 4.90 (t,  $J$  = 7.3 Hz, 2H), 4.38 (q,  $J$  = 7.1 Hz, 2H), 4.15 (q,  $J$  = 7.1 Hz, 2H), 2.95 (t,  $J$  = 7.3 Hz, 2H), 1.41 (t,  $J$  = 7.1 Hz, 3H), 1.24 (t,  $J$  = 7.2 Hz, 3H). <sup>13</sup>C NMR (150 MHz, CDCl<sub>3</sub>)  $\delta$  170.96, 159.79, 150.22, 133.65, 132.59, 128.79, 128.17, 125.64, 108.23, 61.30, 60.84, 47.46, 35.06, 14.36. HRMS (EI):  $m/z$  [M]<sup>+</sup> calcd. for C<sub>17</sub>H<sub>20</sub>N<sub>2</sub>O<sub>4</sub>: 316.1423. Found: 316.1425.

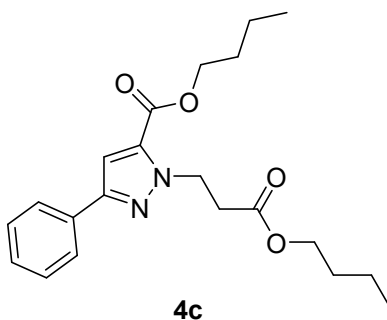

**Butyl 1-(3-butoxy-3-oxopropyl)-3-phenyl-1H-pyrazole-5-carboxylate (4c):** Compound **4c** was isolated as a yellow oil (54.4mg, 73%) by a column chromatography on silica gel (eluent: petroleum ether/ethyl acetate = 15:1). <sup>1</sup>H NMR (400 MHz, CDCl<sub>3</sub>) δ 7.79 (d, *J* = 7.6 Hz, 2H), 7.39 (t, *J* = 7.6 Hz, 2H), 7.31 (t, *J* = 7.3 Hz, 1H), 7.11 (s, 1H), 4.90 (t, *J* = 7.3 Hz, 2H), 4.32 (t, *J* = 6.6 Hz, 2H), 4.09 (t, *J* = 6.7 Hz, 2H), 2.96 (t, *J* = 7.3 Hz, 2H), 1.80 – 1.71 (m, 2H), 1.63 – 1.54 (m, 2H), 1.53 – 1.43 (m, 2H), 1.39 – 1.28 (m, 2H), 0.99 (t, *J* = 7.4 Hz, 3H), 0.90 (t, *J* = 7.4 Hz, 3H). <sup>13</sup>C NMR (150 MHz, CDCl<sub>3</sub>) δ 171.03, 159.87, 150.23, 133.63, 132.61, 128.77, 128.15, 125.65, 108.19, 65.14, 64.75, 47.48, 35.03, 30.76, 19.19, 13.83. HRMS (EI): *m/z* [M]<sup>+</sup> calcd. for C<sub>21</sub>H<sub>28</sub>N<sub>2</sub>O<sub>4</sub>: 372.2049. Found: 372.2046.

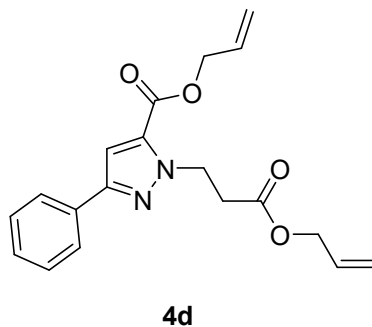

**Allyl 1-(3-(allyloxy)-3-oxopropyl)-3-phenyl-1H-pyrazole-5-carboxylate (4d):** Compound **4d** was isolated as a yellow oil (34.0mg, 50%) by a column chromatography on silica gel (eluent: petroleum ether/ethyl acetate = 15:1). <sup>1</sup>H NMR (400 MHz, CDCl<sub>3</sub>) δ 7.79 (d, *J* = 7.2 Hz, 2H), 7.40 (t, *J* = 7.4 Hz, 2H), 7.32 (t, *J* = 7.3 Hz, 1H), 7.15 (s, 1H), 6.09 – 5.98 (m, 1H), 5.95 – 5.84 (m, 1H), 5.43 (d, *J* = 17.2 Hz, 1H), 5.31 (t, *J* = 13.5 Hz, 2H), 5.21 (d, *J* = 10.4 Hz, 1H), 4.92 (t, *J* = 7.2 Hz, 2H), 4.82 (d, *J* = 5.7 Hz, 2H), 4.60 (d, *J* = 5.8 Hz, 2H), 3.00 (t, *J* = 7.2 Hz, 2H). <sup>13</sup>C NMR (150 MHz, DMSO) δ 170.22, 158.69, 149.12, 133.19, 132.46, 132.14, 131.98, 128.73, 128.10, 125.21, 118.39, 117.78, 108.05, 65.26, 64.64, 46.94, 34.04. HRMS (EI): *m/z* [M]<sup>+</sup> calcd. for C<sub>19</sub>H<sub>20</sub>N<sub>2</sub>O<sub>4</sub>: 340.1423. Found: 340.1425.

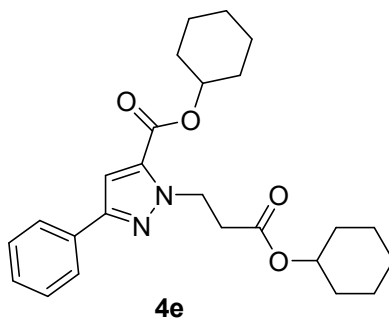

**Cyclohexyl 1-(3-(cyclohexyloxy)-3-oxopropyl)-3-phenyl-1H-pyrazole-5-carboxylate (4e):**

Compound **4e** was isolated as a white solid (58.6mg, 69%) by a column chromatography on silica gel (eluent: petroleum ether/ethyl acetate = 15:1), m.p. 65.9–66.4 °C. <sup>1</sup>H NMR (400 MHz, CDCl<sub>3</sub>) δ 7.79 (d, *J* = 7.2 Hz, 2H), 7.39 (t, *J* = 7.5 Hz, 2H), 7.31 (t, *J* = 7.3 Hz, 1H), 7.12 (s, 1H), 5.06 – 4.97 (m, 1H), 4.89 (t, *J* = 7.3 Hz, 2H), 4.83 – 4.73 (m, 1H), 2.94 (t, *J* = 7.3 Hz, 2H), 2.00 – 1.28 (m, 20H). <sup>13</sup>C NMR (150 MHz, CDCl<sub>3</sub>) δ 170.39, 159.24, 150.15, 134.09, 132.67, 128.76, 128.12, 125.68, 108.24, 73.87, 73.14, 47.65, 35.44, 31.66, 25.47, 23.80. HRMS (EI): *m/z* [M]<sup>+</sup> calcd. for C<sub>25</sub>H<sub>32</sub>N<sub>2</sub>O<sub>4</sub>: 424.2362. Found: 424.2365.

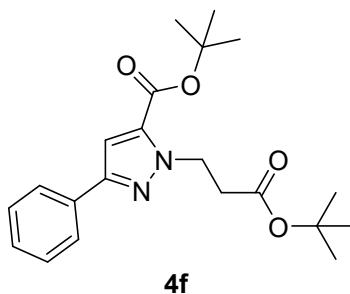

**Tert-butyl 1-(3-(tert-butoxy)-3-oxopropyl)-3-phenyl-1H-pyrazole-5-carboxylate (4f):** Compound **4f** was isolated as a white solid (55.9mg, 75%) by a column chromatography on silica gel (eluent: petroleum ether/ethyl acetate = 15:1), m.p. 57.6–58.2 °C. <sup>1</sup>H NMR (400 MHz, CDCl<sub>3</sub>) δ 7.79 (d, *J* = 7.2 Hz, 2H), 7.39 (t, *J* = 7.5 Hz, 2H), 7.30 (t, *J* = 7.3 Hz, 1H), 7.04 (s, 1H), 4.82 (t, *J* = 7.4 Hz, 2H), 2.87 (t, *J* = 7.4 Hz, 2H), 1.61 (s, 9H), 1.43 (s, 9H). <sup>13</sup>C NMR (150 MHz, CDCl<sub>3</sub>) δ 170.21, 158.99, 149.87, 134.96, 132.79, 128.75, 128.04, 125.66, 108.19, 82.53, 81.00, 47.73, 36.27, 28.36. HRMS (EI): *m/z* [M]<sup>+</sup> calcd. for C<sub>21</sub>H<sub>28</sub>N<sub>2</sub>O<sub>4</sub>: 372.2049. Found: 372.2047.

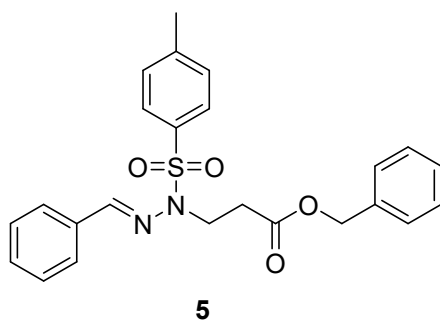

**Benzyl (*E*)-3-(2-benzylidene-1-tosylhydrazinyl)propanoate (5):** Compound **5** was isolated as a yellow oil (52.4 mg, 60%) by a column chromatography on silica gel (eluents: petroleum ether/ethyl acetate = 15:1). <sup>1</sup>H NMR (400 MHz, CDCl<sub>3</sub>) δ 8.19 (s, 1H), 7.74 (d, *J* = 7.9 Hz, 2H), 7.65 (d, *J* = 6.8 Hz, 2H), 7.45 – 7.29 (m, 10H), 5.12 (s, 2H), 3.85 (t, *J* = 7.2 Hz, 2H), 2.67 (t, *J* = 7.2 Hz, 2H), 2.42 (s, 3H). <sup>13</sup>C NMR (150 MHz, CDCl<sub>3</sub>) δ 170.95, 155.15, 144.38, 135.62, 133.71, 133.63, 131.08, 129.69, 128.84, 128.68, 128.48, 128.46, 128.44, 128.11, 66.77, 45.46, 33.19, 21.69. HRMS (EI): *m/z* [M]<sup>+</sup> calcd. for C<sub>24</sub>H<sub>24</sub>N<sub>2</sub>O<sub>4</sub>S: 436.1457. Found: 436.1460.

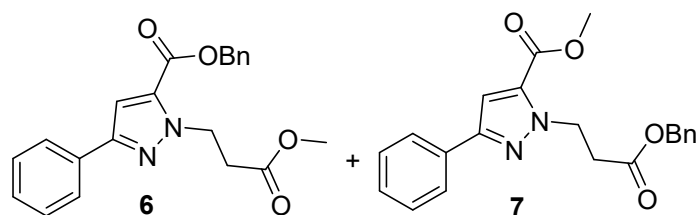

**The mixture of compound 6 and 7:** Compound **6** and **7** was isolated as a white solid (32.8mg, 45%) by a column chromatography on silica gel (eluents: petroleum ether/ethyl acetate = 13:1). <sup>1</sup>H NMR (400 MHz, CDCl<sub>3</sub>) δ 7.81 (d, *J* = 7.4 Hz, 3H), 7.48 (d, *J* = 7.3 Hz, 1H), 7.43 (t, *J* = 7.2 Hz, 4H), 7.39–7.31 (m, 6.55H), 7.19 (s, 0.43H), 7.15 (s, 1H), 5.39 (s, 0.89H), 5.17 (s, 2H), 4.95 (q, *J* = 7.3 Hz, 3H), 3.93 (s, 3H), 3.72 (s, 1.38H), 3.06 (t, *J* = 7.1 Hz, 2H), 2.99 (t, *J* = 7.2 Hz, 1H). <sup>13</sup>C NMR (151 MHz, CDCl<sub>3</sub>) δ 171.28, 170.74, 160.13, 159.49, 150.27, 150.23, 135.68, 135.37, 133.22, 133.20, 132.44, 132.40, 128.74, 128.72, 128.58, 128.55, 128.39, 128.26, 128.12, 125.56, 108.40, 108.23, 66.86, 66.60, 52.07, 51.87, 47.33, 47.26, 34.83, 34.69. HRMS (EI): *m/z* [M]<sup>+</sup> calcd. for C<sub>21</sub>H<sub>20</sub>N<sub>2</sub>O<sub>4</sub>: 364.1423. Found: 364.1426.

## 4. Copies of NMR Spectra

### Benzyl 1-(3-(benzyloxy)-3-oxopropyl)-3-phenyl-1*H*-pyrazole-5-carboxylate (3a): <sup>1</sup>H NMR

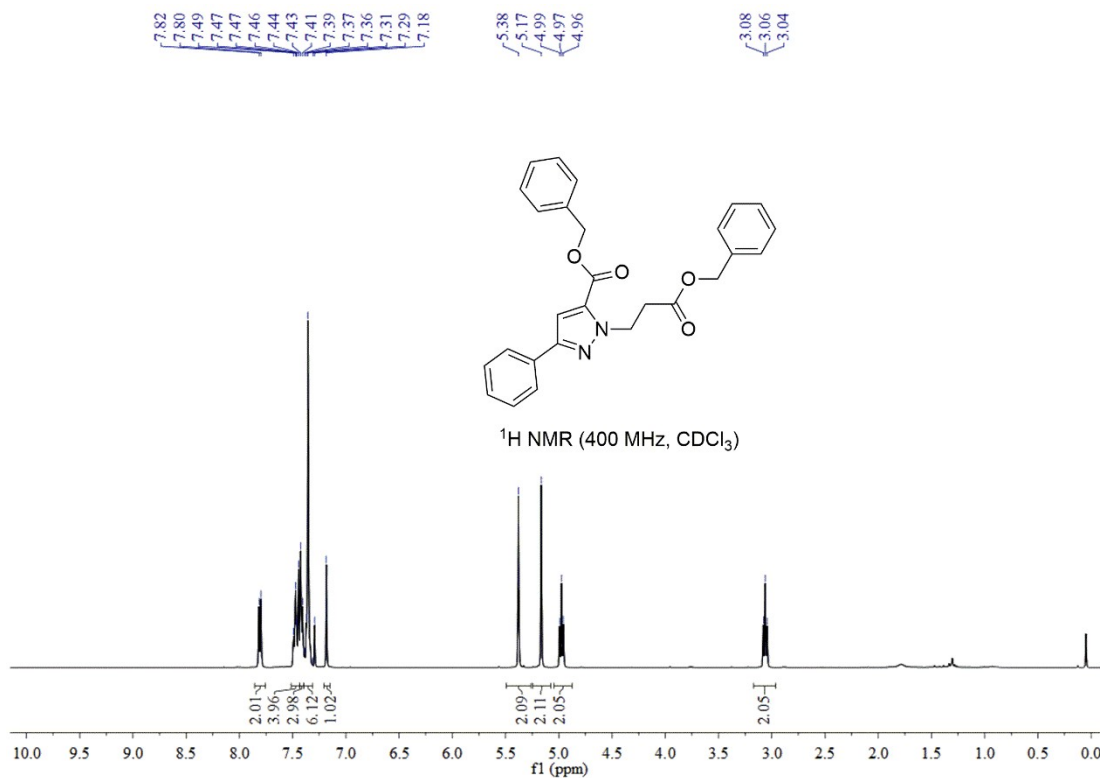

### Benzyl 1-(3-(benzyloxy)-3-oxopropyl)-3-phenyl-1*H*-pyrazole-5-carboxylate (3a): <sup>13</sup>C NMR

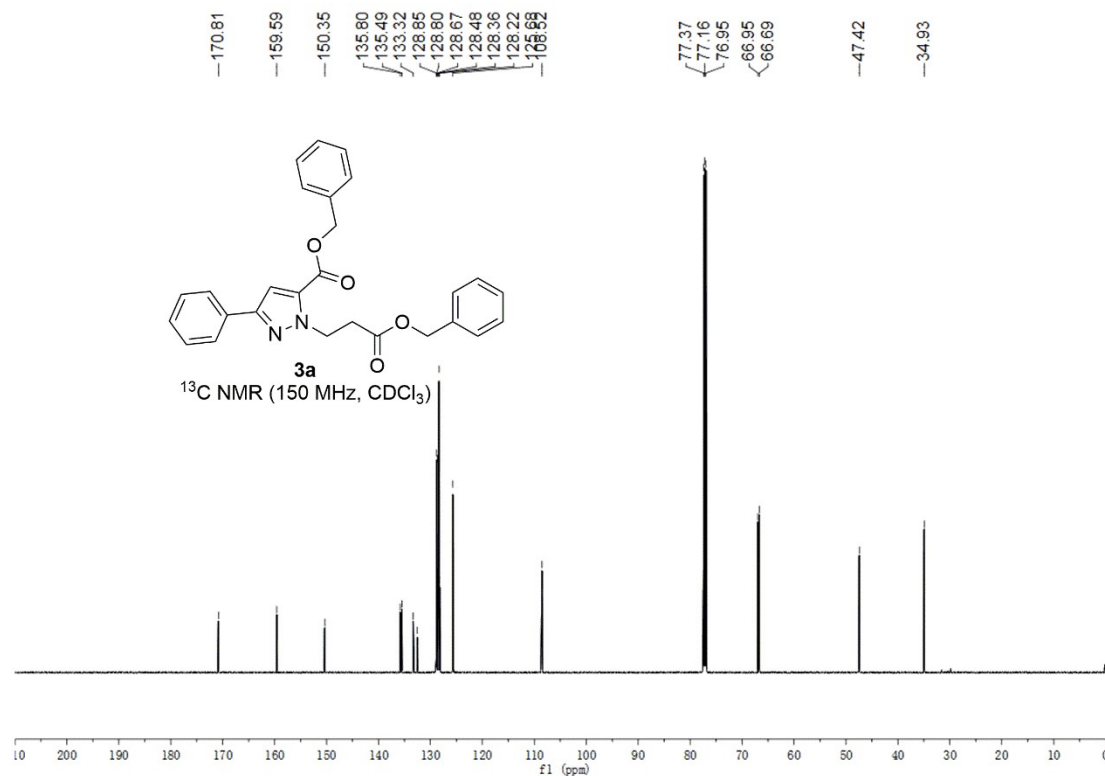

**Benzyl 1-(3-(benzyloxy)-3-oxopropyl)-3-(p-tolyl)-1H-pyrazole-5-carboxylate (3b): <sup>1</sup>H NMR**

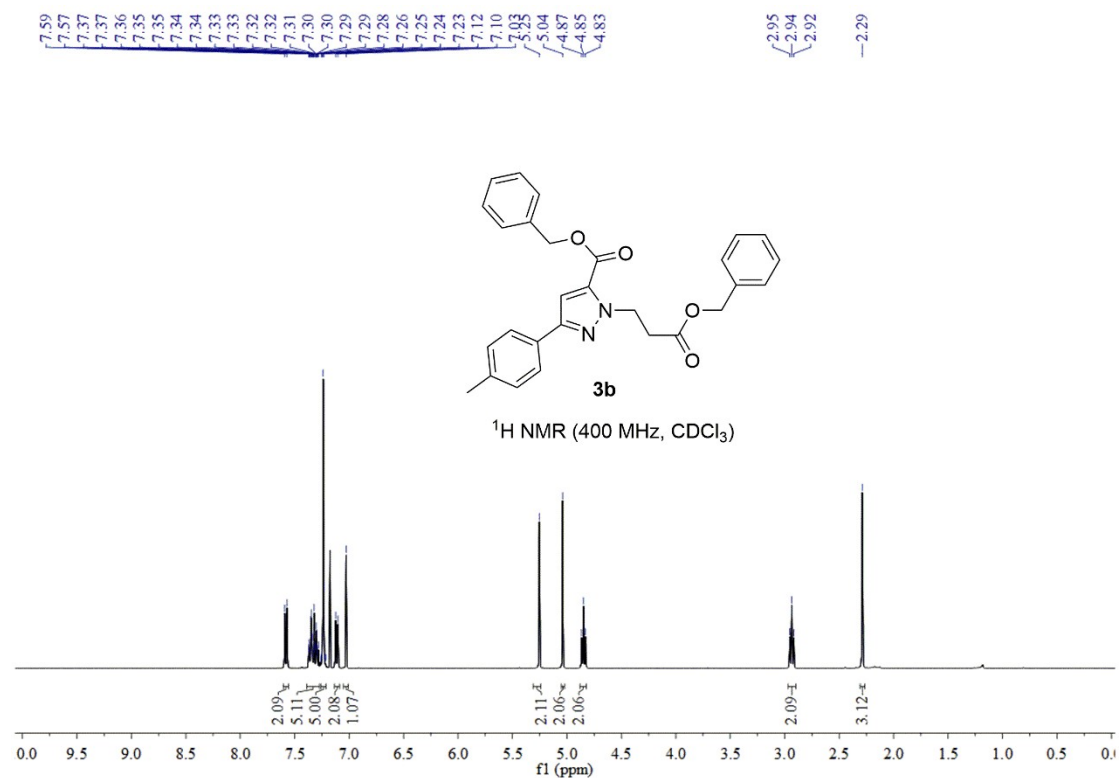

**Benzyl 1-(3-(benzyloxy)-3-oxopropyl)-3-(p-tolyl)-1H-pyrazole-5-carboxylate (3b): <sup>13</sup>C NMR**

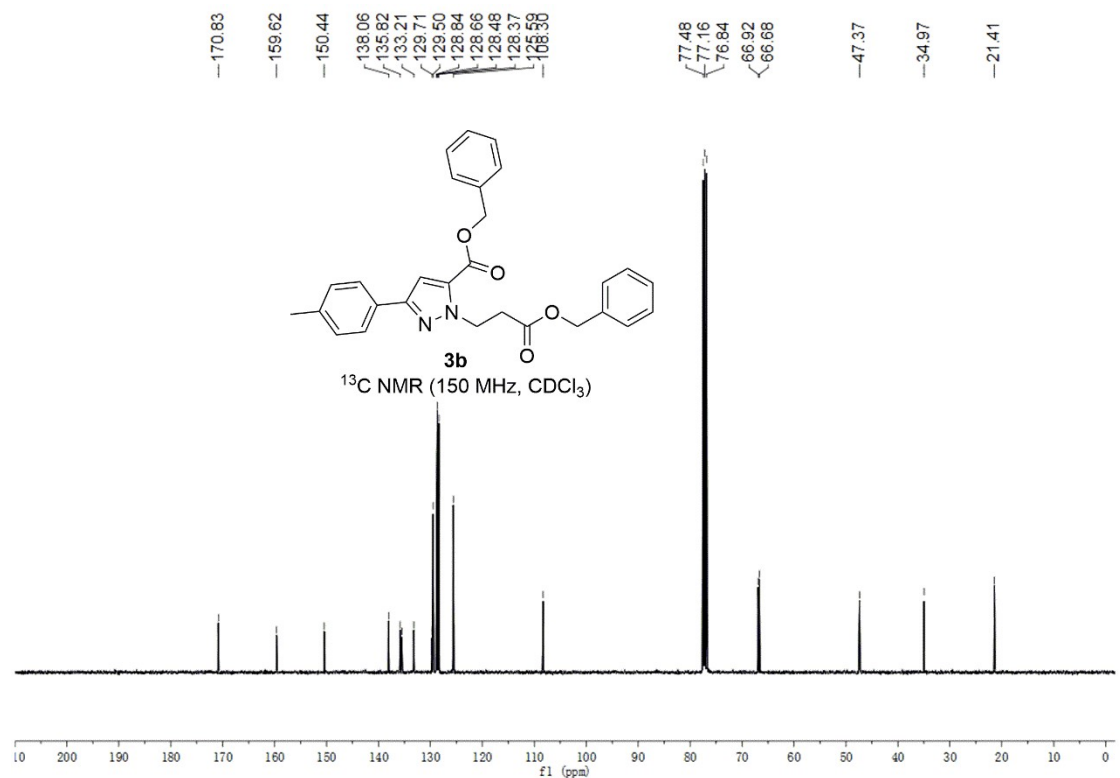

**Benzyl 1-(3-(benzyloxy)-3-oxopropyl)-3-(4-(tert-butyl)phenyl)-1H-pyrazole-5-carboxylate (3c): <sup>1</sup>H NMR**

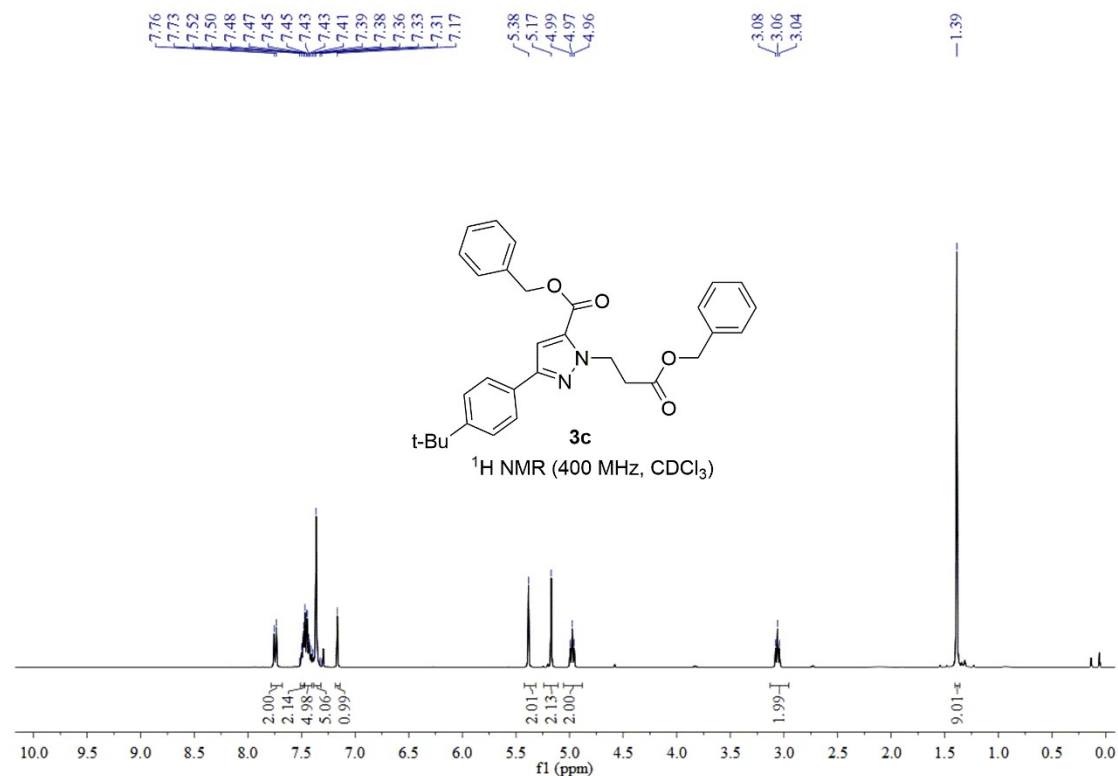

**Benzyl 1-(3-(benzyloxy)-3-oxopropyl)-3-(4-(tert-butyl)phenyl)-1H-pyrazole-5-carboxylate (3c): <sup>13</sup>C NMR**

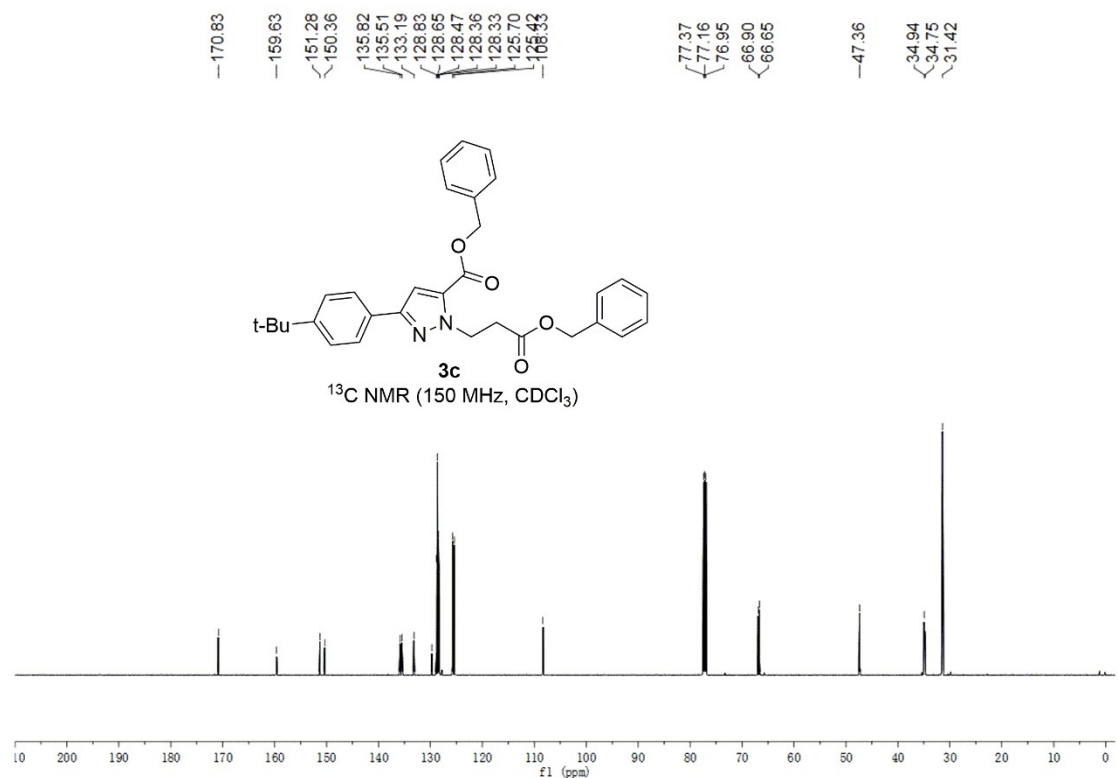

**Benzyl 1-(3-(benzyloxy)-3-oxopropyl)-3-(4-methoxyphenyl)-1H-pyrazole-5-carboxylate (3d): <sup>1</sup>H NMR**

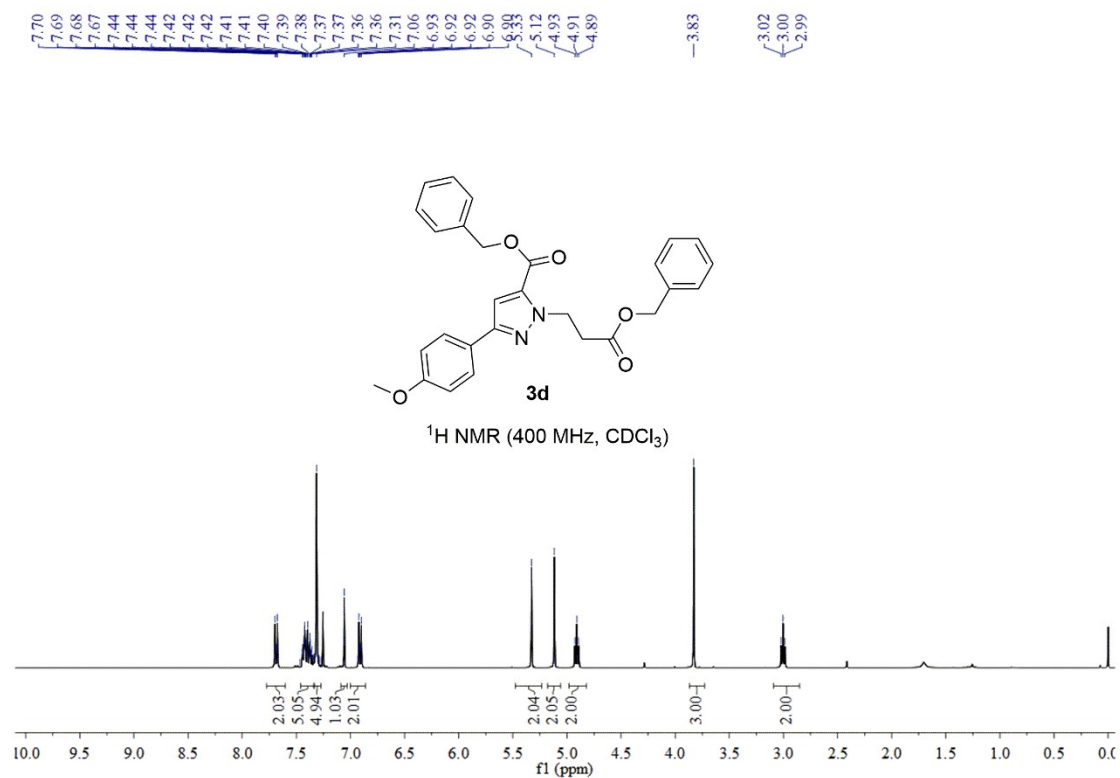

**Benzyl 1-(3-(benzyloxy)-3-oxopropyl)-3-(4-methoxyphenyl)-1H-pyrazole-5-carboxylate (3d): <sup>13</sup>C NMR**

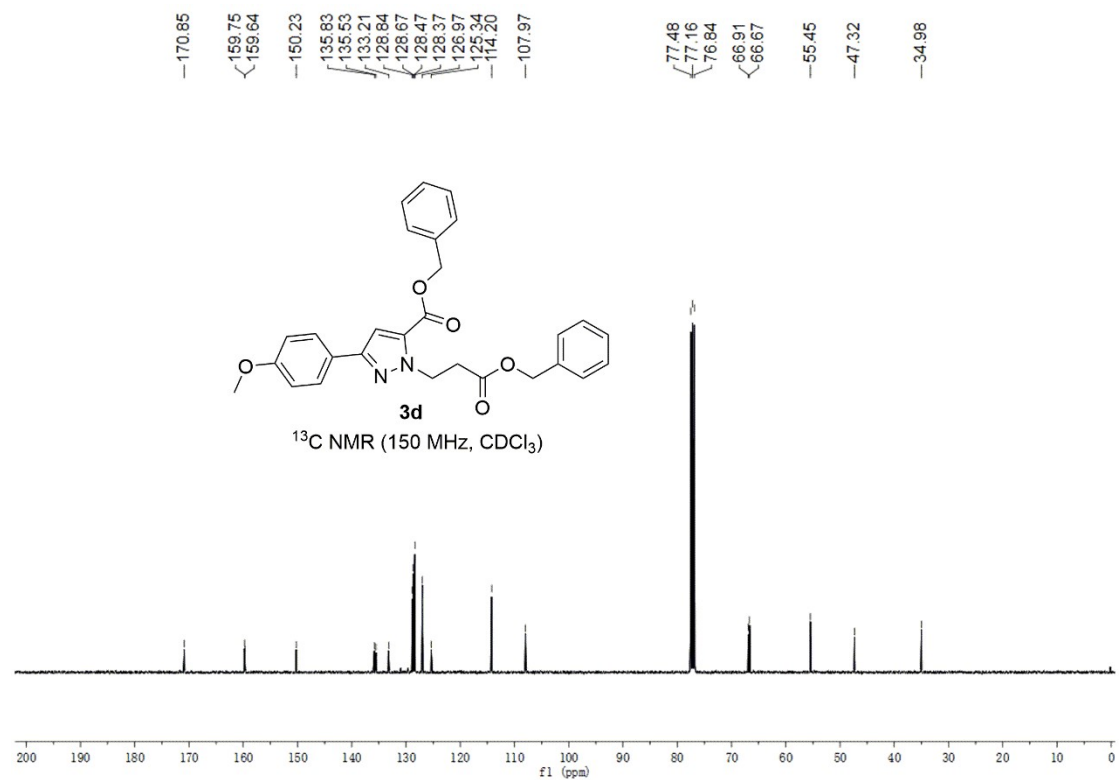



**Benzyl 1-(3-(benzyloxy)-3-oxopropyl)-3-(4-fluorophenyl)-1H-pyrazole-5-carboxylate (3e): <sup>1</sup>H NMR**

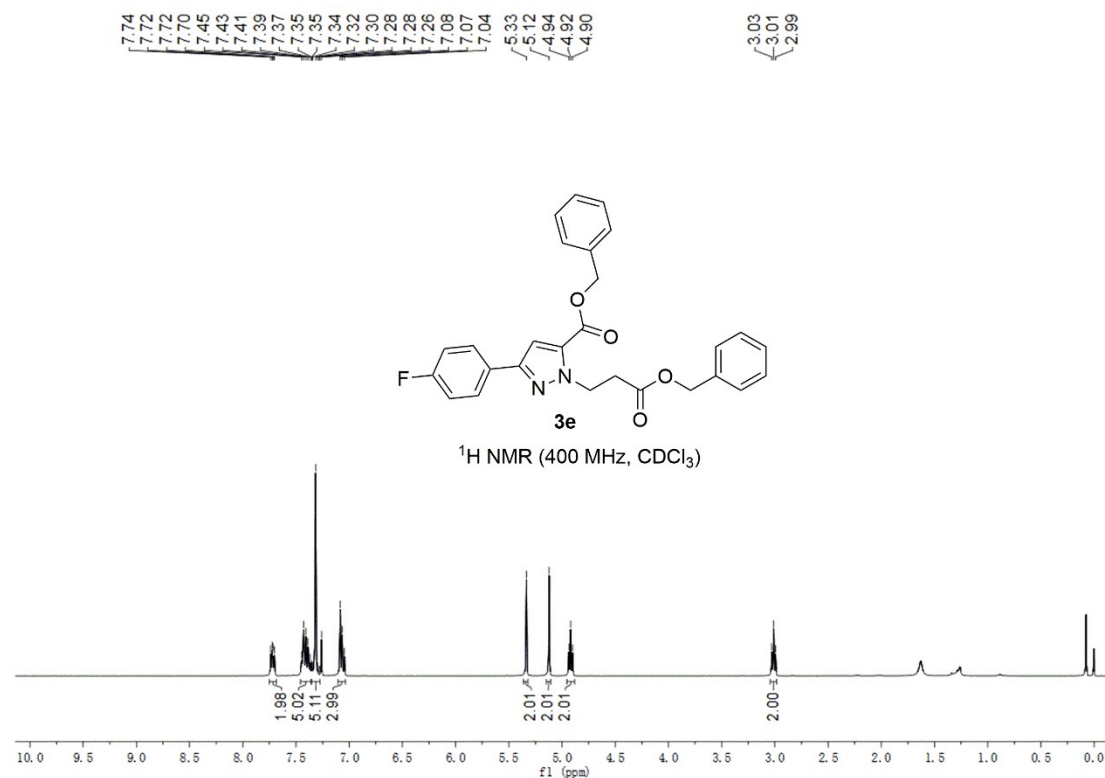

**Benzyl 1-(3-(benzyloxy)-3-oxopropyl)-3-(4-fluorophenyl)-1H-pyrazole-5-carboxylate (3e): <sup>13</sup>C NMR**

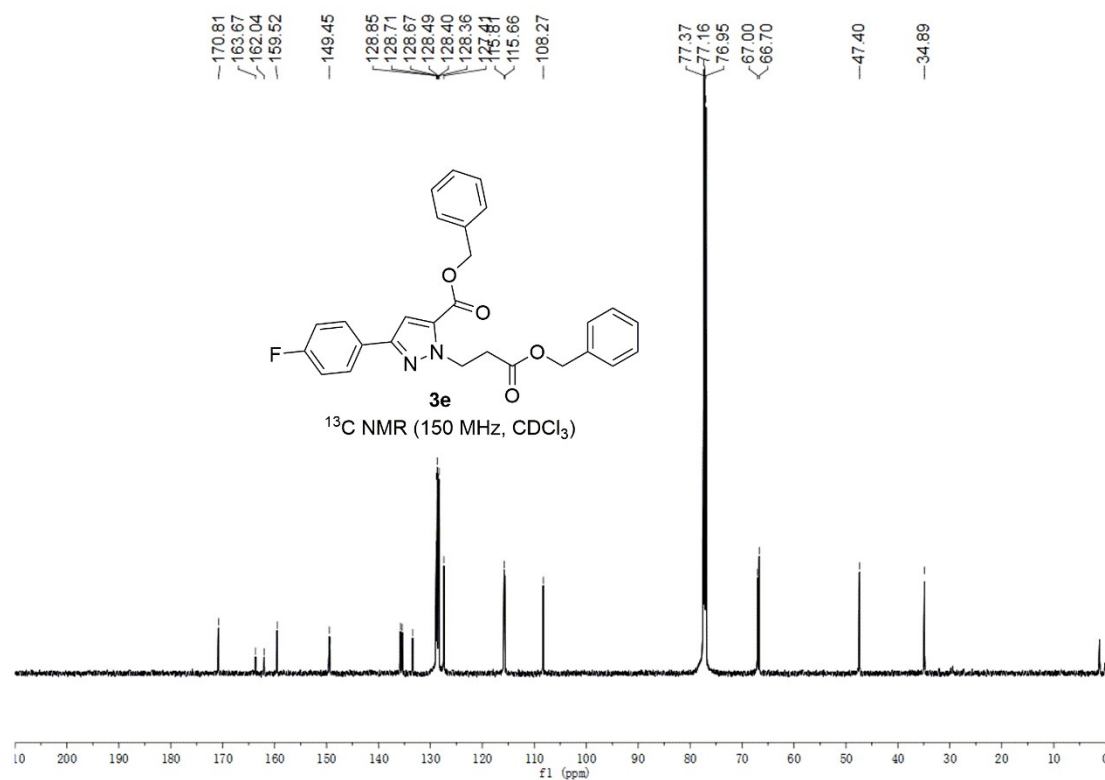

**Benzyl 1-(3-(benzyloxy)-3-oxopropyl)-3-(4-chlorophenyl)-1H-pyrazole-5-carboxylate (3f): <sup>1</sup>H NMR**

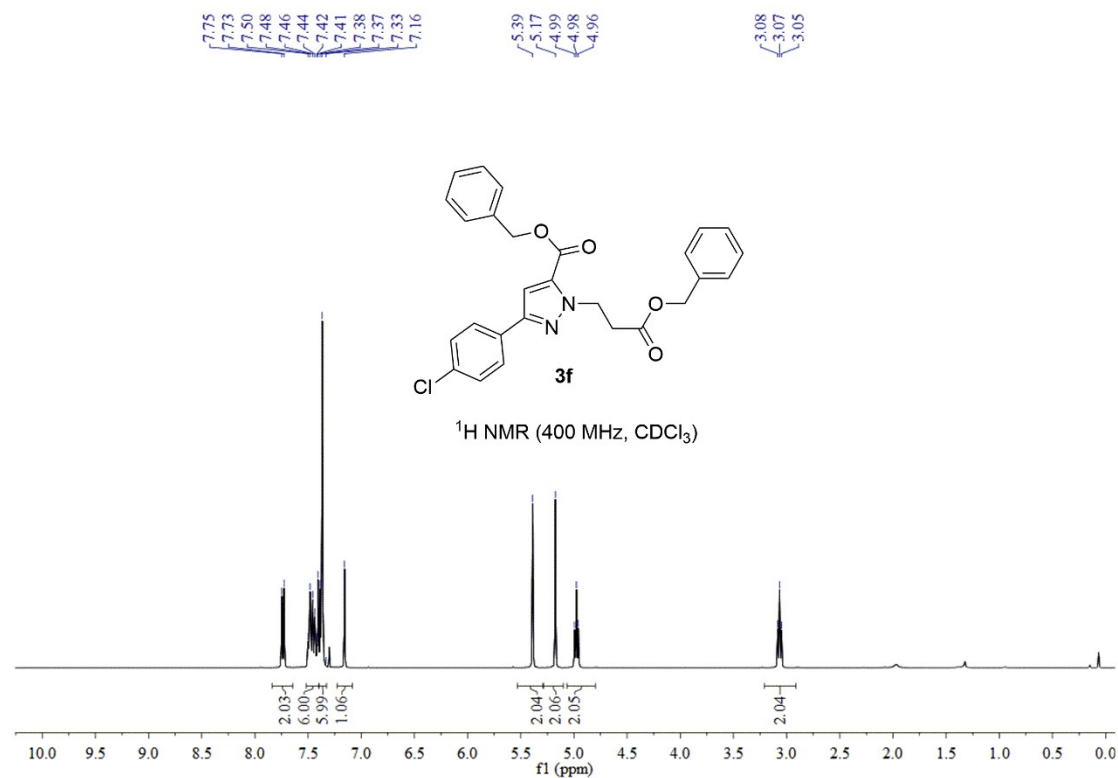

**Benzyl 1-(3-(benzyloxy)-3-oxopropyl)-3-(4-chlorophenyl)-1H-pyrazole-5-carboxylate (3f): <sup>13</sup>C NMR**

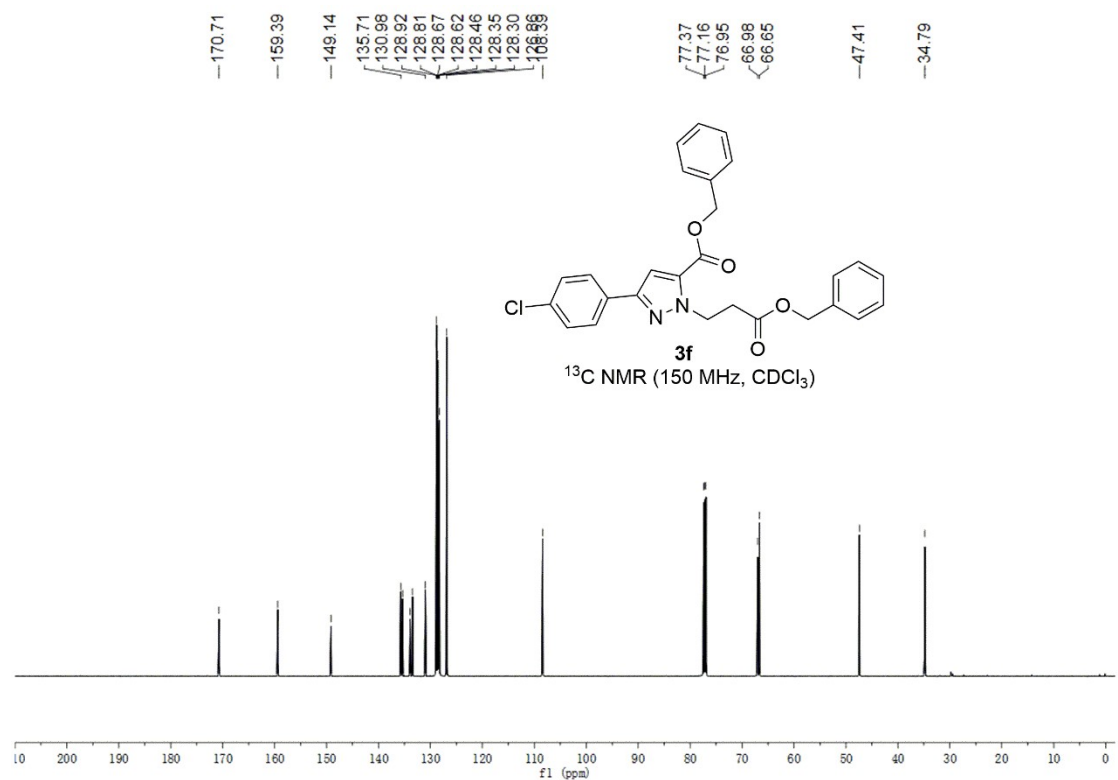

**Benzyl 1-(3-(benzyloxy)-3-oxopropyl)-3-(4-bromophenyl)-1H-pyrazole-5-carboxylate (3g): <sup>1</sup>H NMR**

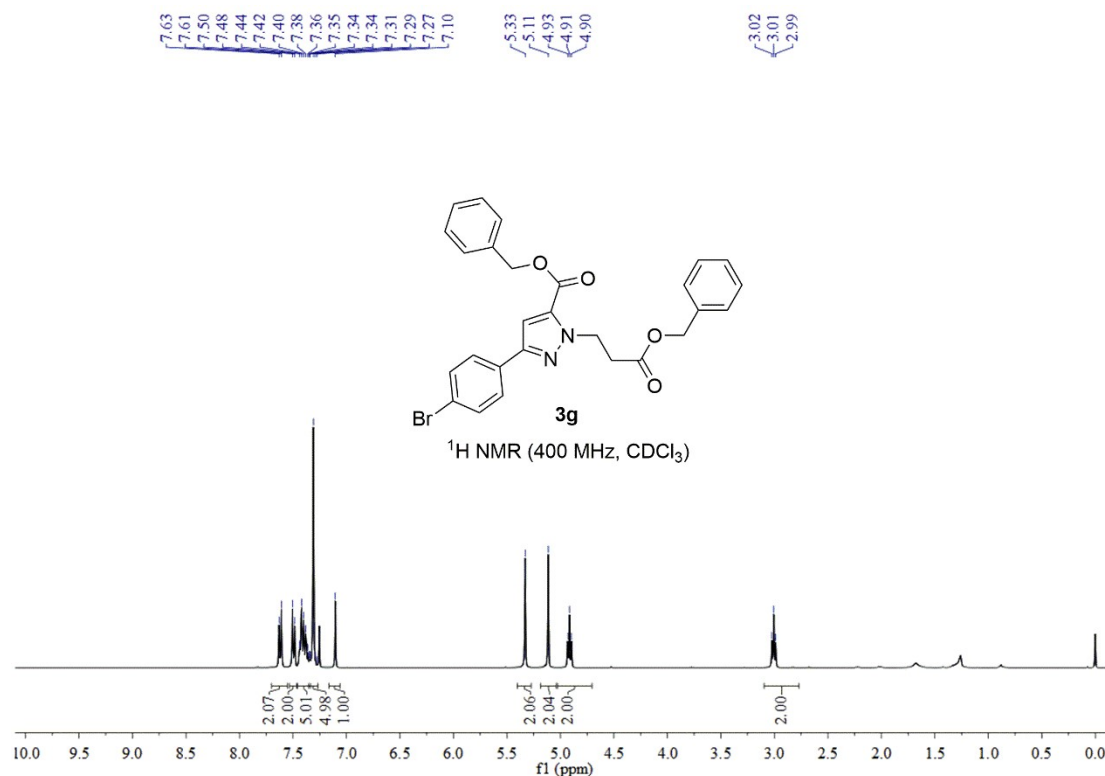

**Benzyl 1-(3-(benzyloxy)-3-oxopropyl)-3-(4-bromophenyl)-1H-pyrazole-5-carboxylate (3g): <sup>13</sup>C NMR**

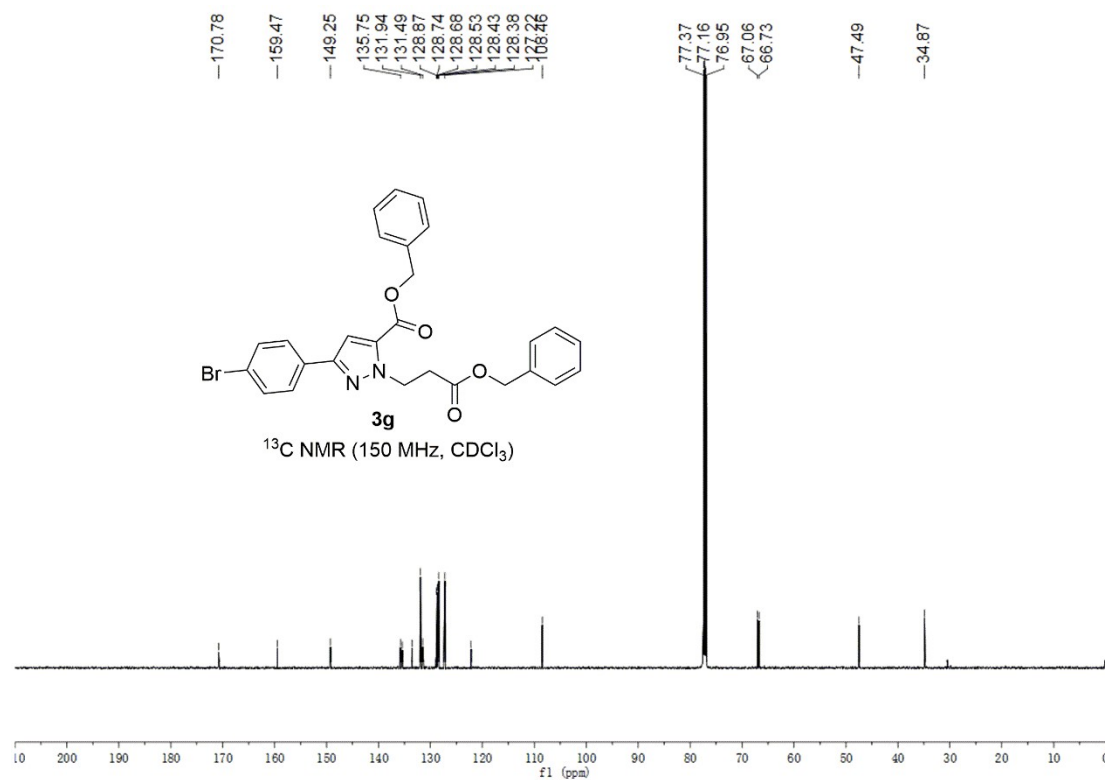

**Benzyl 1-(3-(benzyloxy)-3-oxopropyl)-3-(4-(trifluoromethyl)phenyl)-1H-pyrazole-5-carboxylate (3h): <sup>1</sup>H NMR**

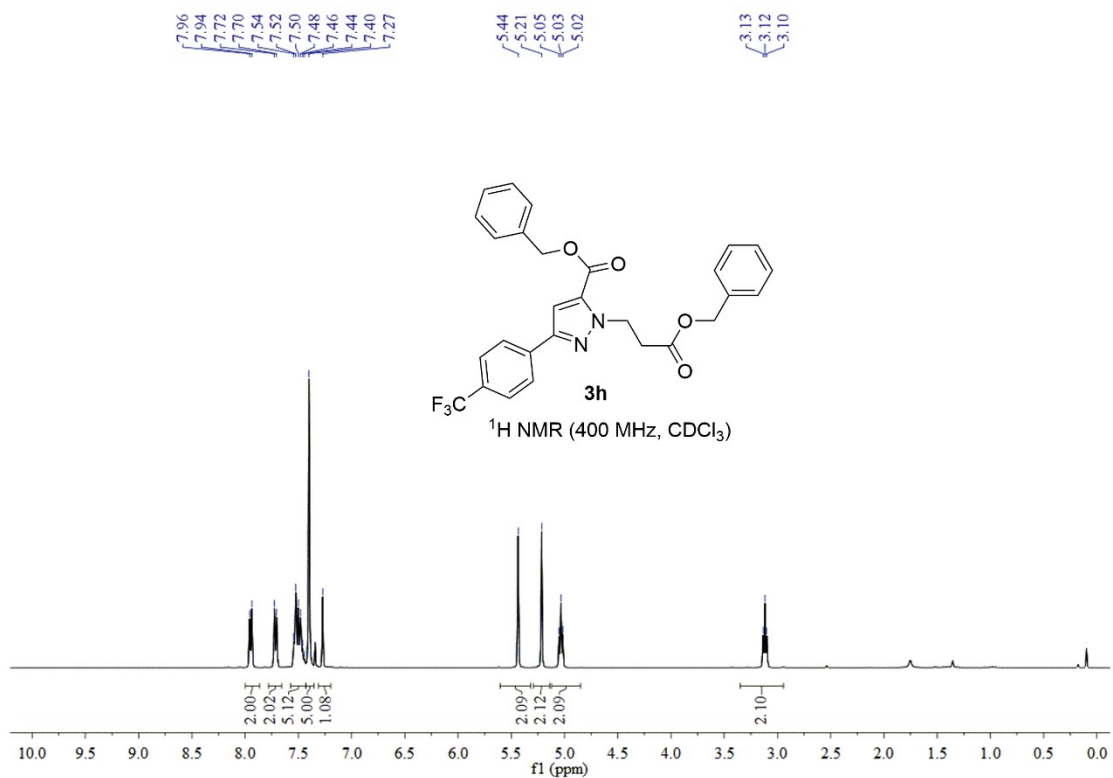

**Benzyl 1-(3-(benzyloxy)-3-oxopropyl)-3-(4-(trifluoromethyl)phenyl)-1H-pyrazole-5-carboxylate (3h): <sup>13</sup>C NMR**

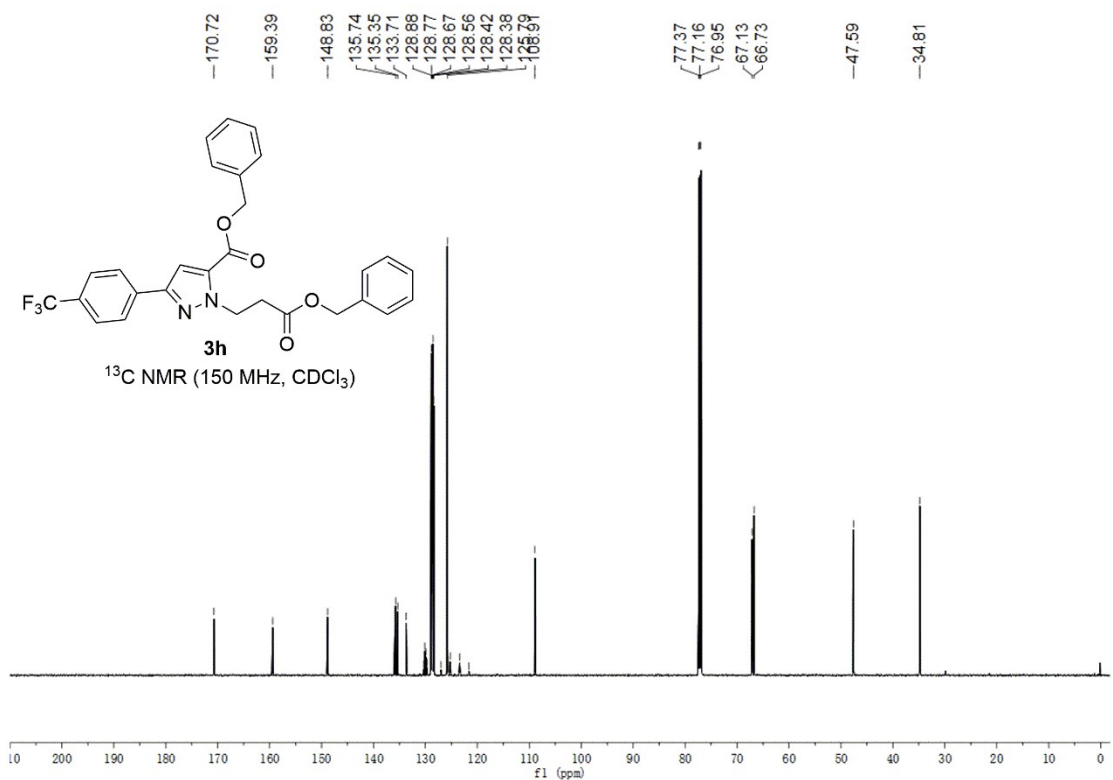

**Benzyl 1-(3-(benzyloxy)-3-oxopropyl)-3-(4-cyanophenyl)-1H-pyrazole-5-carboxylate (3i): <sup>1</sup>H NMR**

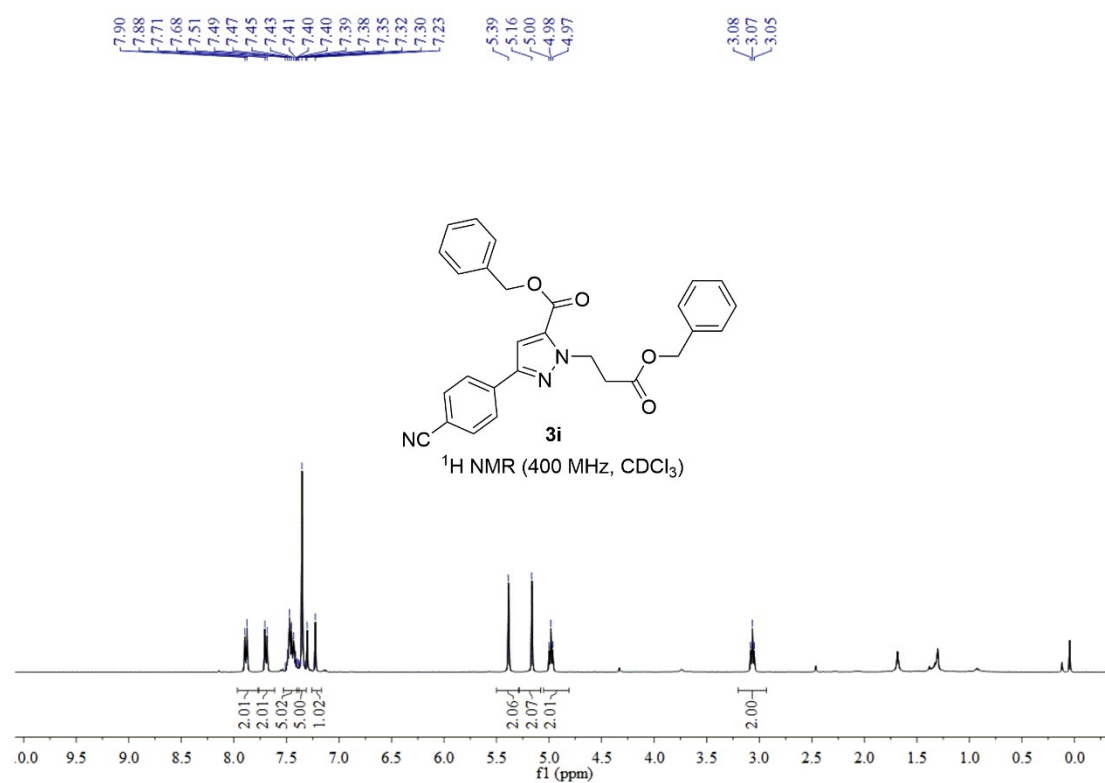

**Benzyl 1-(3-(benzyloxy)-3-oxopropyl)-3-(4-cyanophenyl)-1H-pyrazole-5-carboxylate (3i): <sup>13</sup>C NMR**

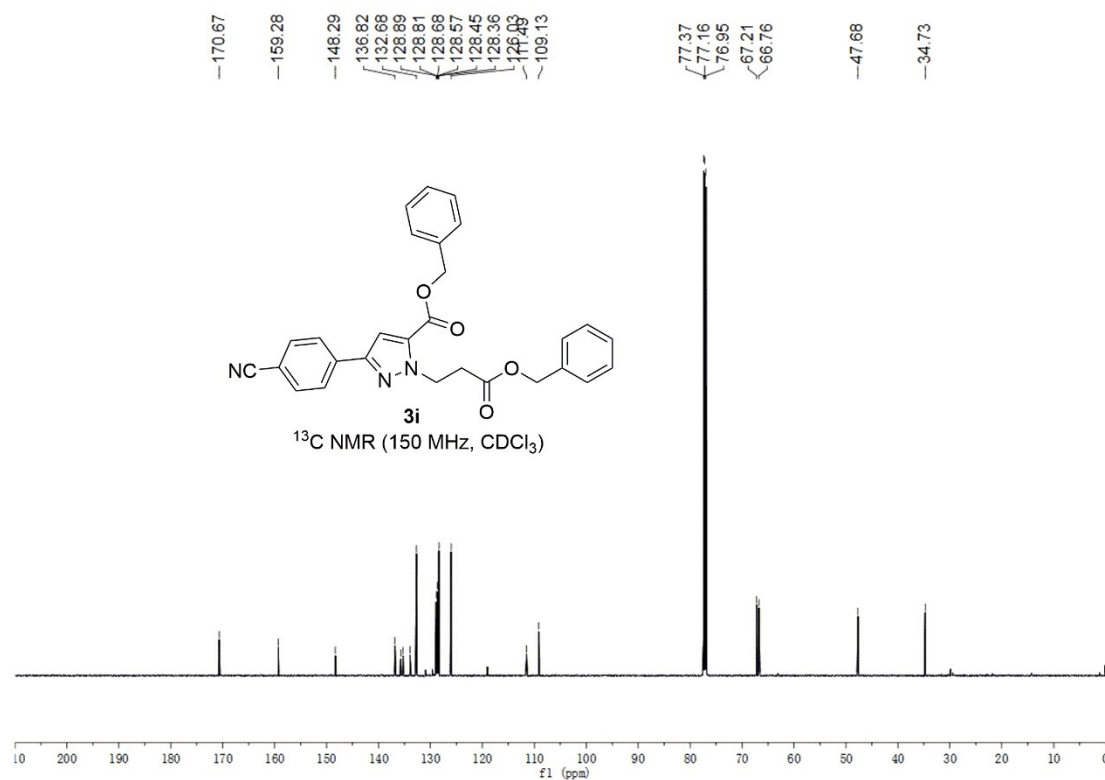

**Benzyl 1-(3-(benzyloxy)-3-oxopropyl)-3-(3-nitrophenyl)-1H-pyrazole-5-carboxylate (3j): <sup>1</sup>H NMR**

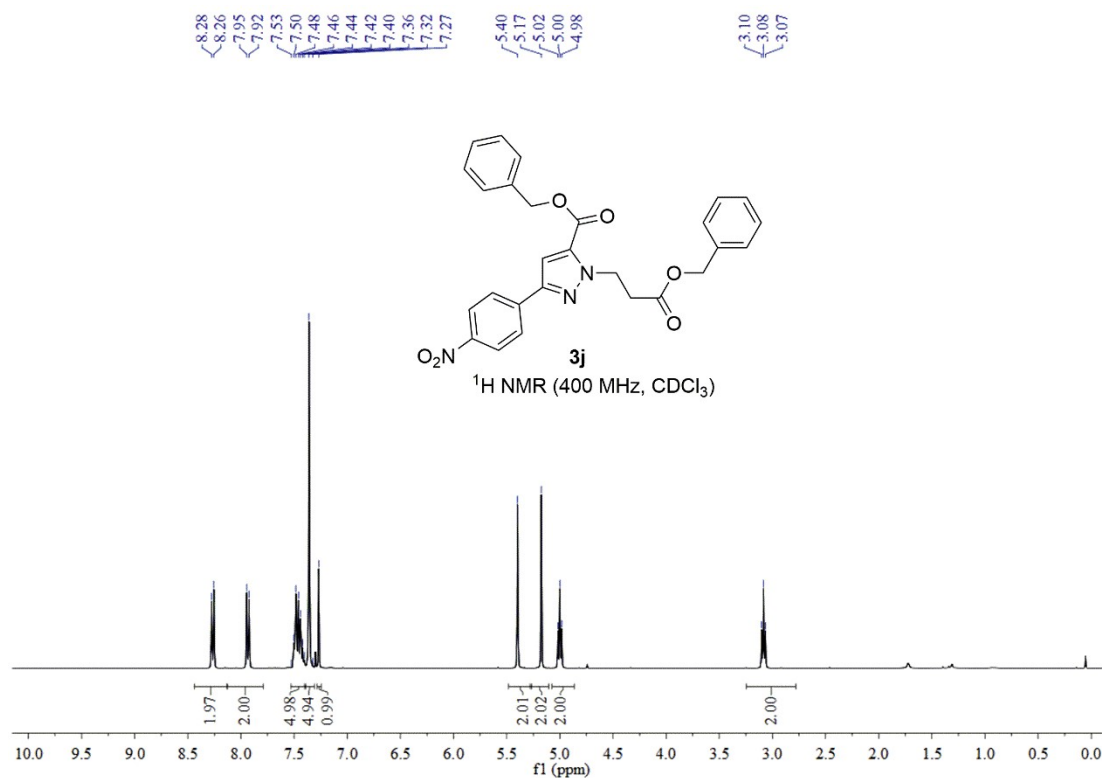

**Benzyl 1-(3-(benzyloxy)-3-oxopropyl)-3-(3-nitrophenyl)-1H-pyrazole-5-carboxylate (3j): <sup>13</sup>C NMR**

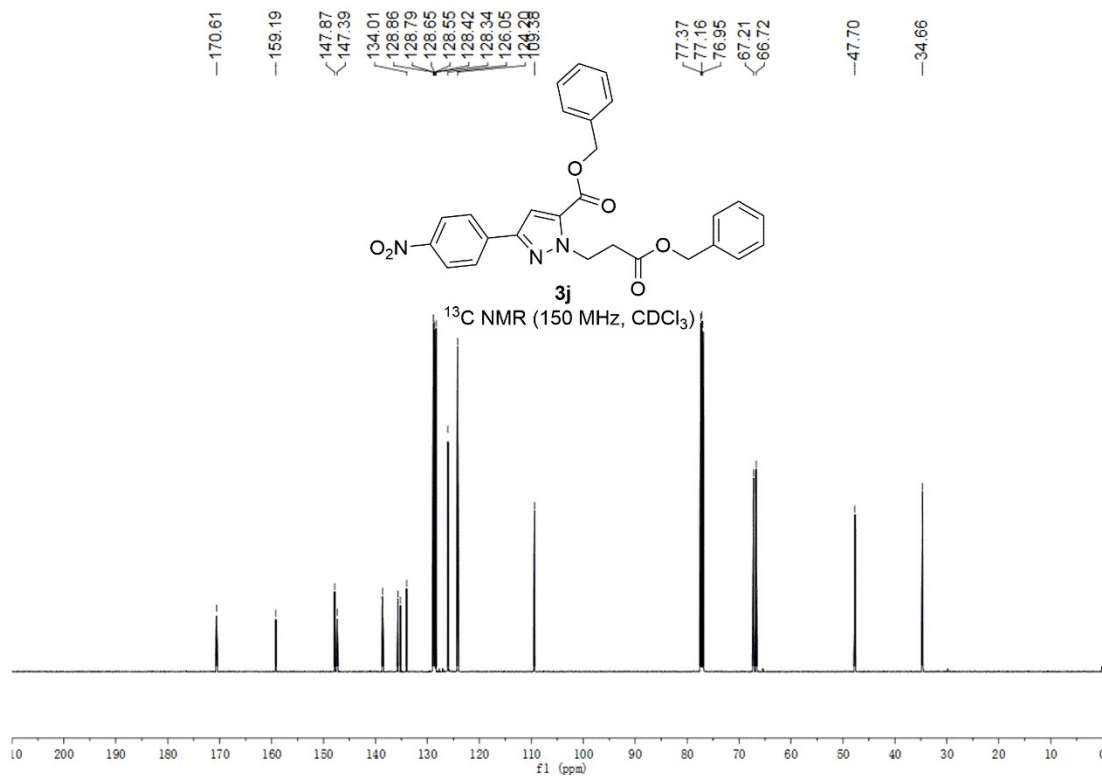

**Benzyl 1-(3-(benzyloxy)-3-oxopropyl)-3-(4-isopropylphenyl)-1H-pyrazole-5-carboxylate (3k): <sup>1</sup>H**

**NMR**

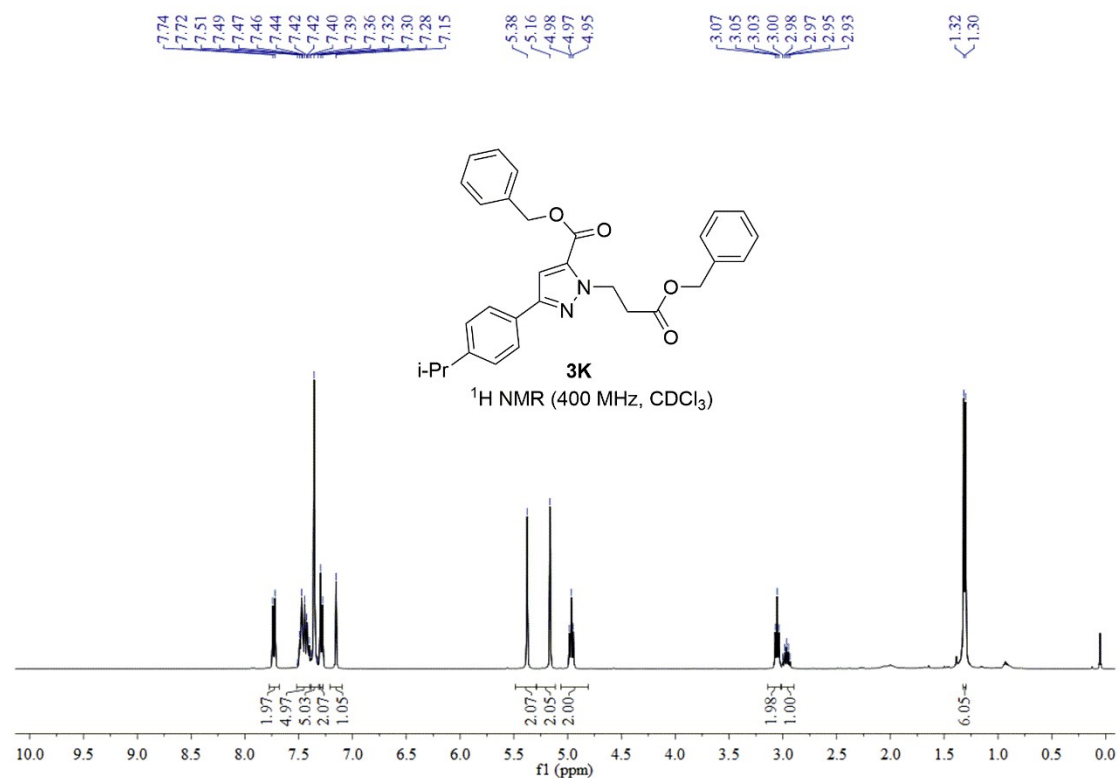

**Benzyl 1-(3-(benzyloxy)-3-oxopropyl)-3-(4-isopropylphenyl)-1H-pyrazole-5-carboxylate (3k): <sup>13</sup>C**

**NMR**

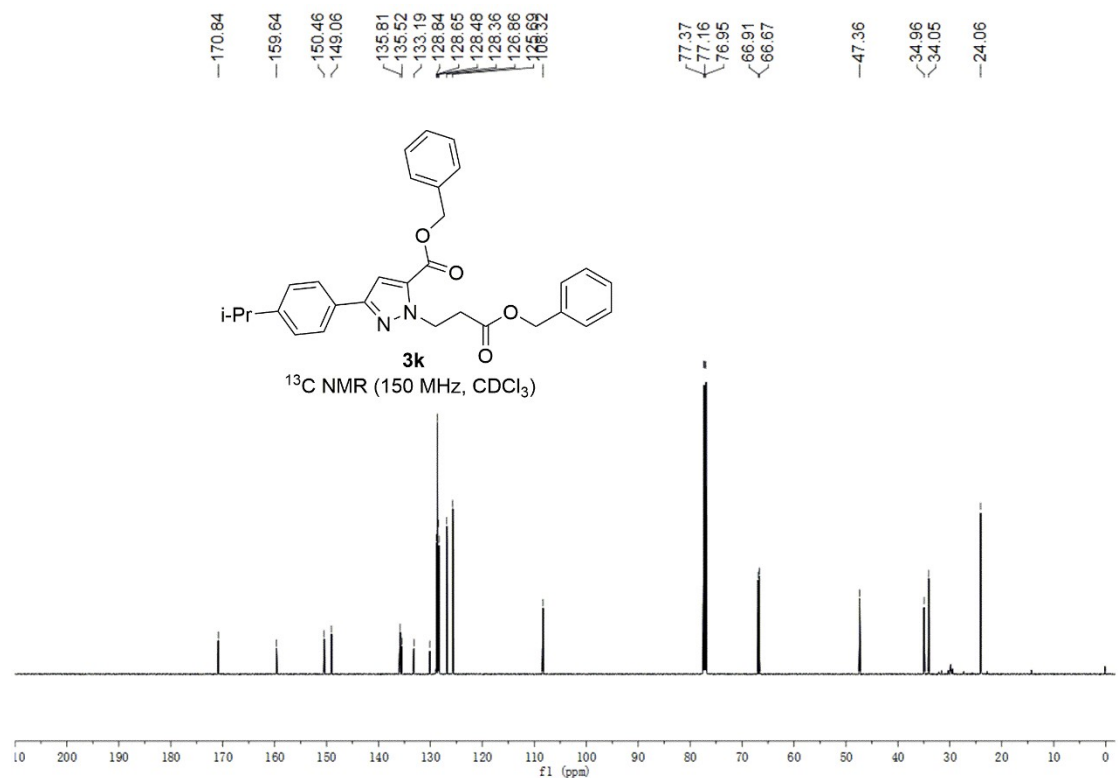

**Benzyl 3-([1,1'-biphenyl]-4-yl)-1-(3-(benzyloxy)-3-oxopropyl)-1H-pyrazole-5-carboxylate (3I): <sup>1</sup>H NMR**

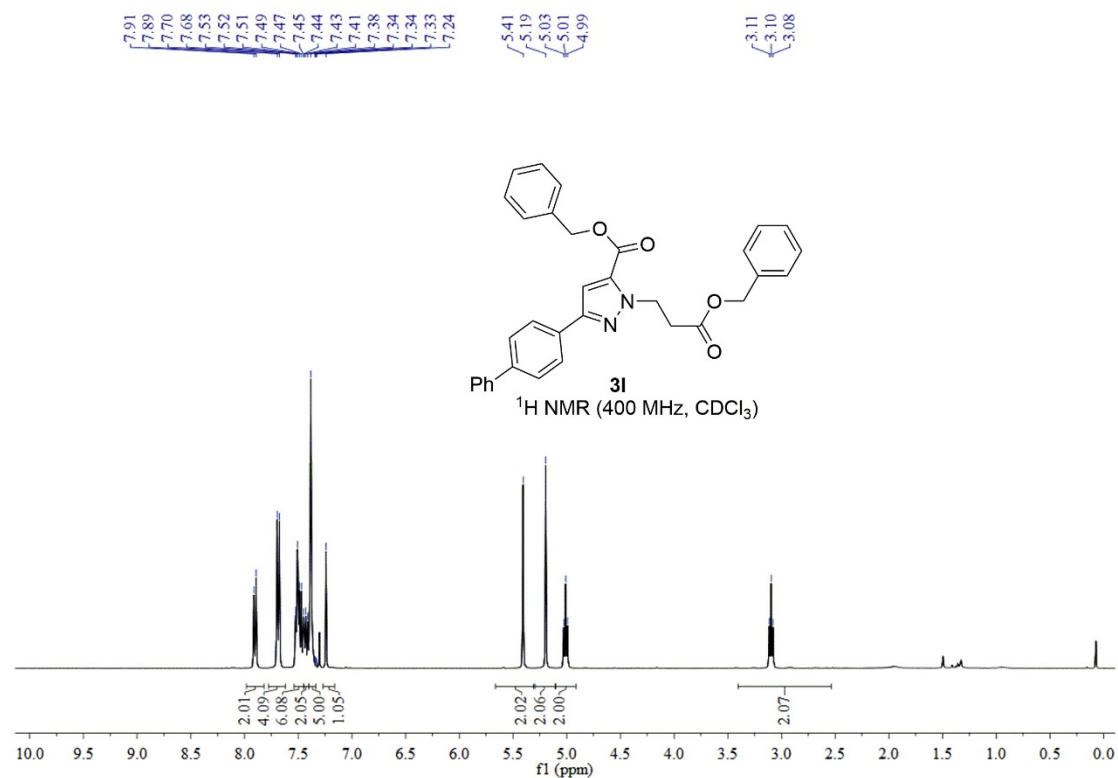

**Benzyl 3-([1,1'-biphenyl]-4-yl)-1-(3-(benzyloxy)-3-oxopropyl)-1H-pyrazole-5-carboxylate (3I): <sup>13</sup>C NMR**

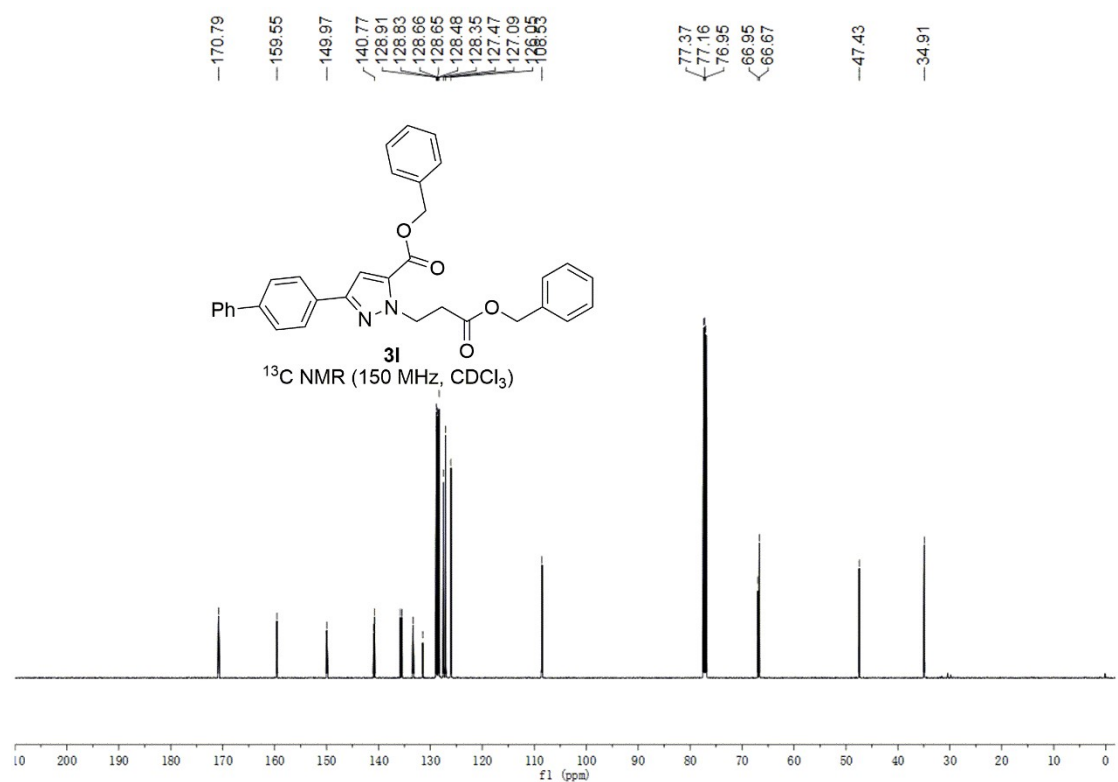



**Benzyl 1-(3-(benzyloxy)-3-oxopropyl)-3-(*o*-tolyl)-1*H*-pyrazole-5-carboxylate (3m): <sup>1</sup>H NMR**

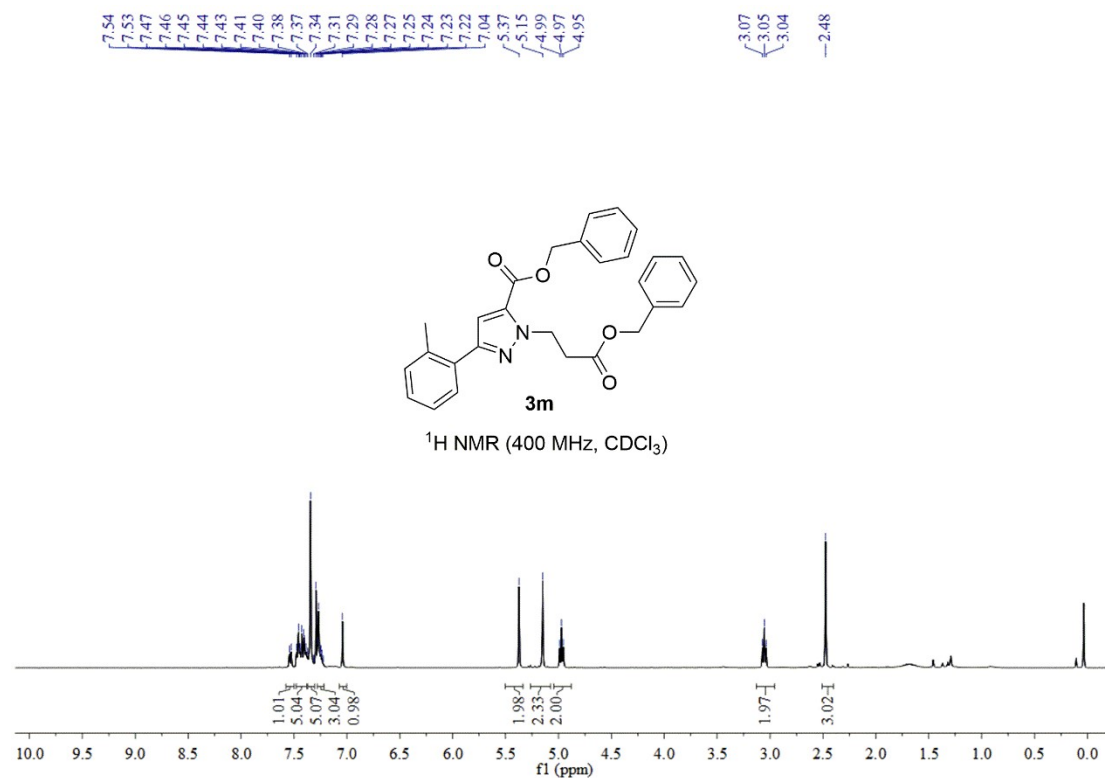

**Benzyl 1-(3-(benzyloxy)-3-oxopropyl)-3-(*o*-tolyl)-1*H*-pyrazole-5-carboxylate (3m): <sup>13</sup>C NMR**

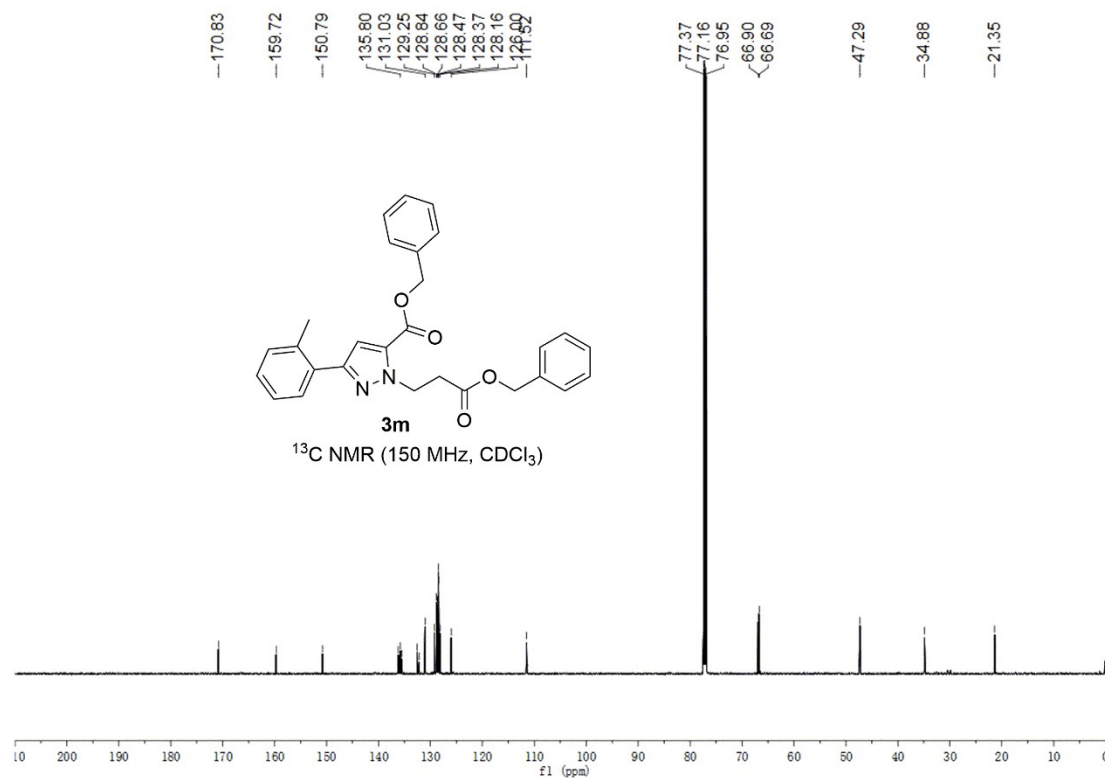

**Benzyl 1-(3-(benzyloxy)-3-oxopropyl)-3-(2-methoxyphenyl)-1H-pyrazole-5-carboxylate (3n): <sup>1</sup>H NMR**

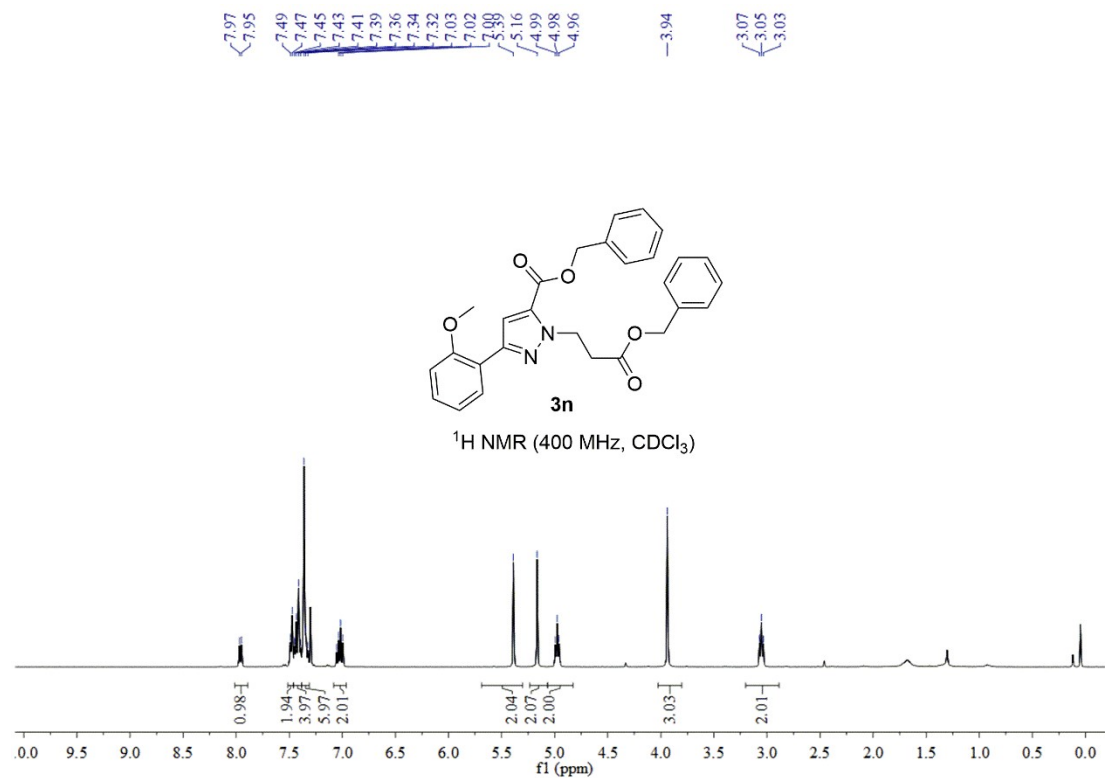

**Benzyl 1-(3-(benzyloxy)-3-oxopropyl)-3-(2-methoxyphenyl)-1H-pyrazole-5-carboxylate (3n): <sup>13</sup>C NMR**

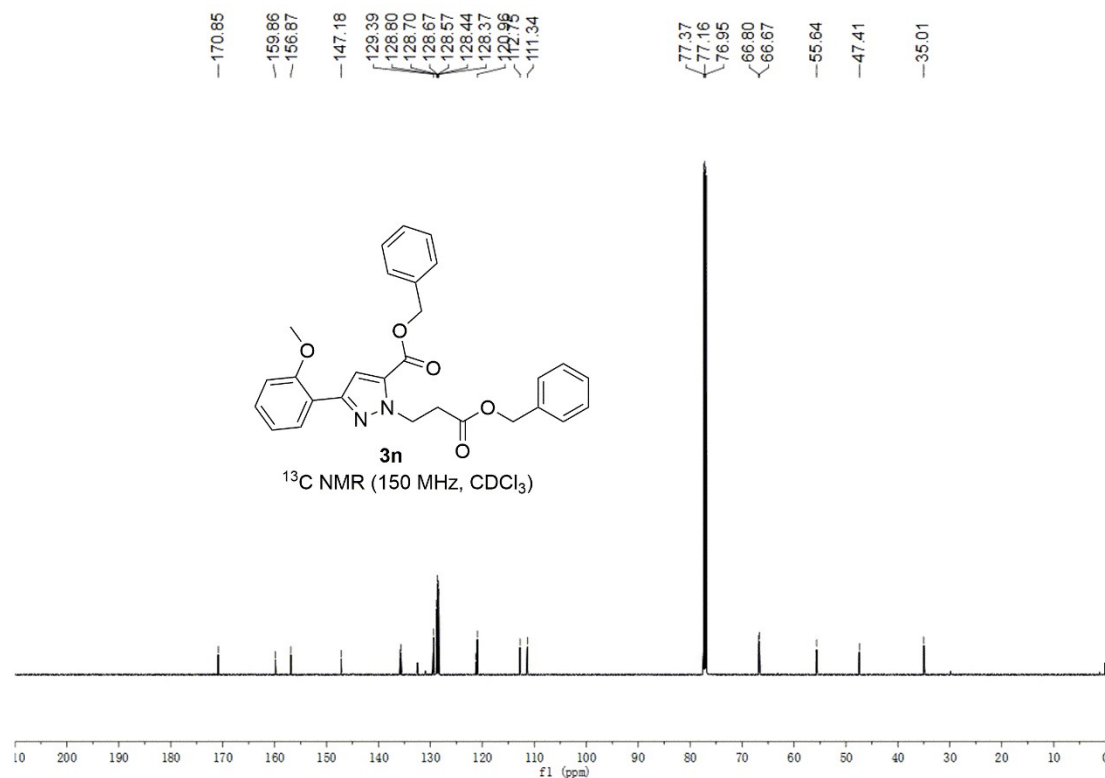

**Benzyl 1-(3-(benzyloxy)-3-oxopropyl)-3-(2-chlorophenyl)-1H-pyrazole-5-carboxylate (3o): <sup>1</sup>H NMR**

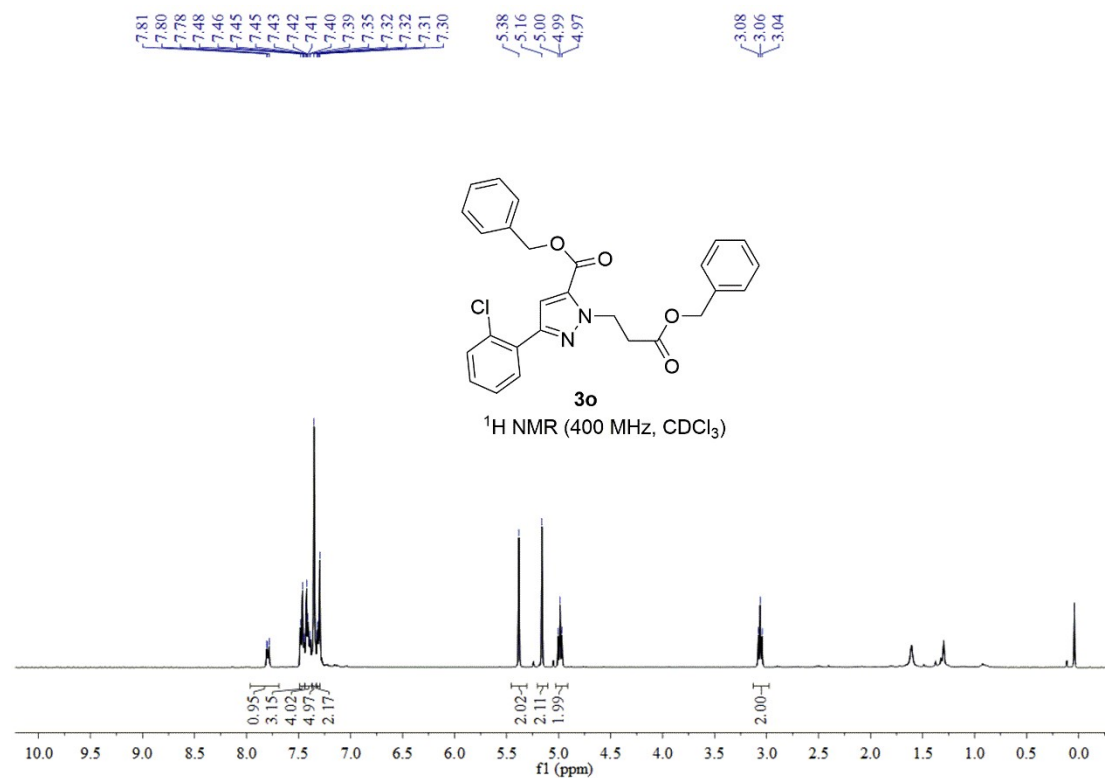

**Benzyl 1-(3-(benzyloxy)-3-oxopropyl)-3-(2-chlorophenyl)-1H-pyrazole-5-carboxylate (3o): <sup>13</sup>C NMR**

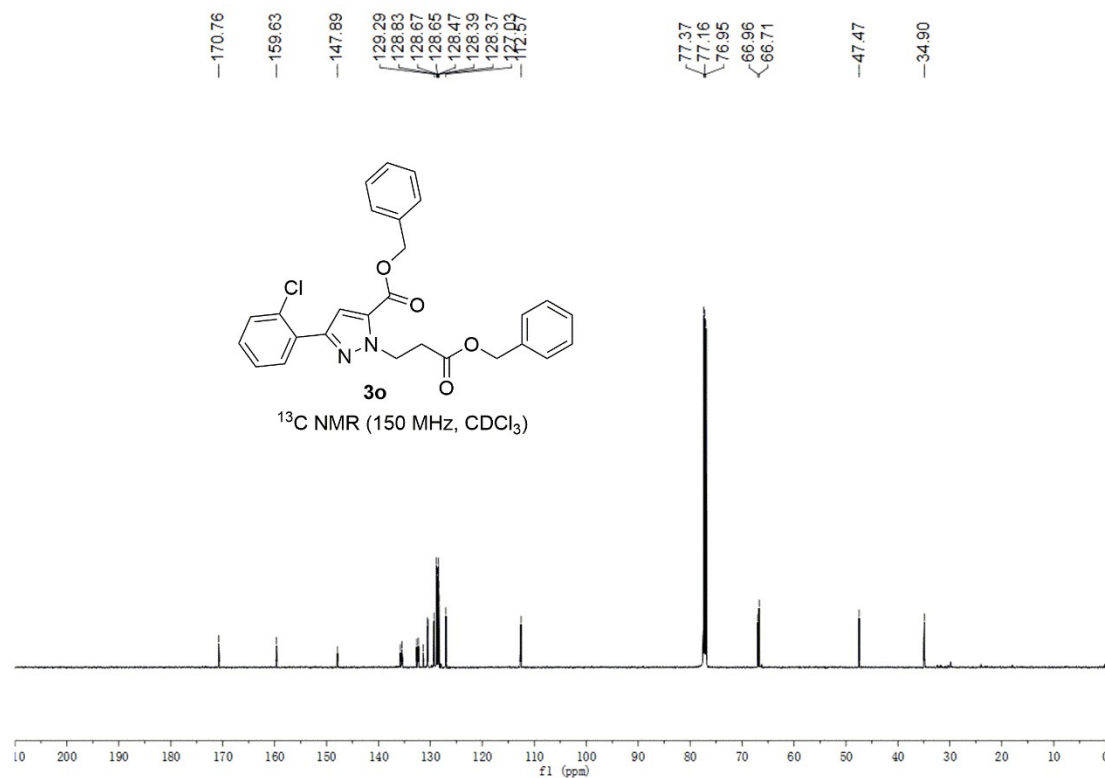

**Benzyl 1-(3-(benzyloxy)-3-oxopropyl)-3-(2-fluorophenyl)-1H-pyrazole-5-carboxylate (3p): <sup>1</sup>H NMR**

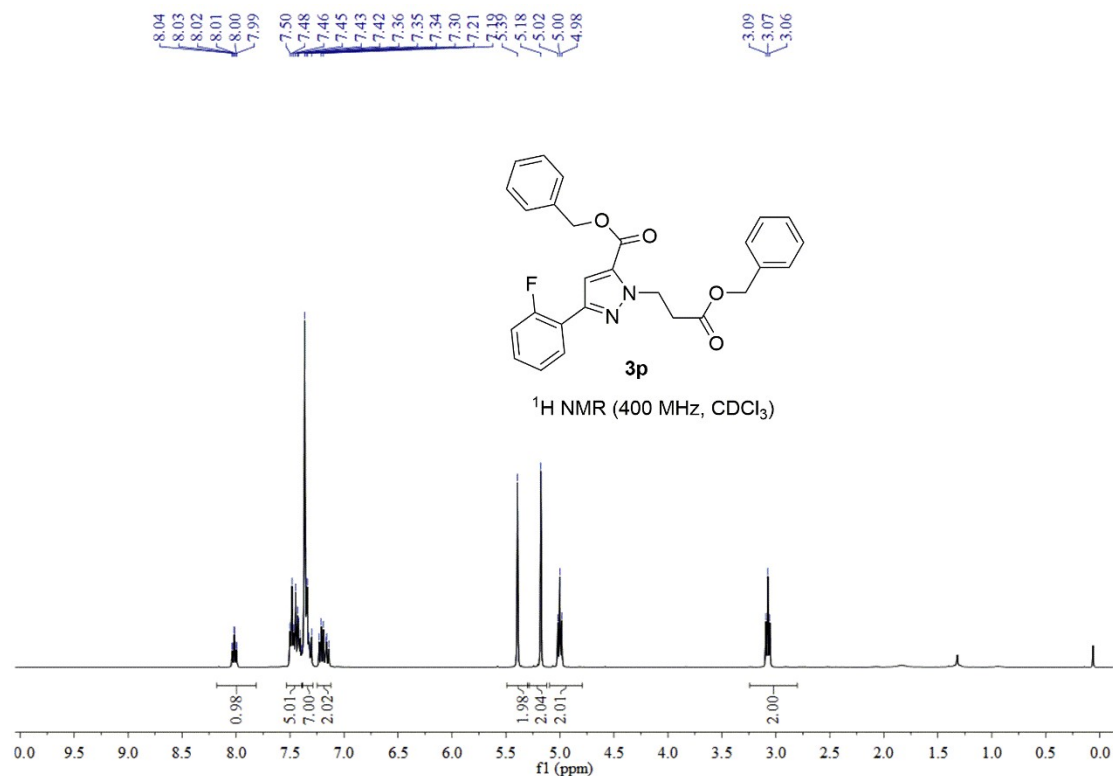

**Benzyl 1-(3-(benzyloxy)-3-oxopropyl)-3-(2-fluorophenyl)-1H-pyrazole-5-carboxylate (3p): <sup>13</sup>C NMR**

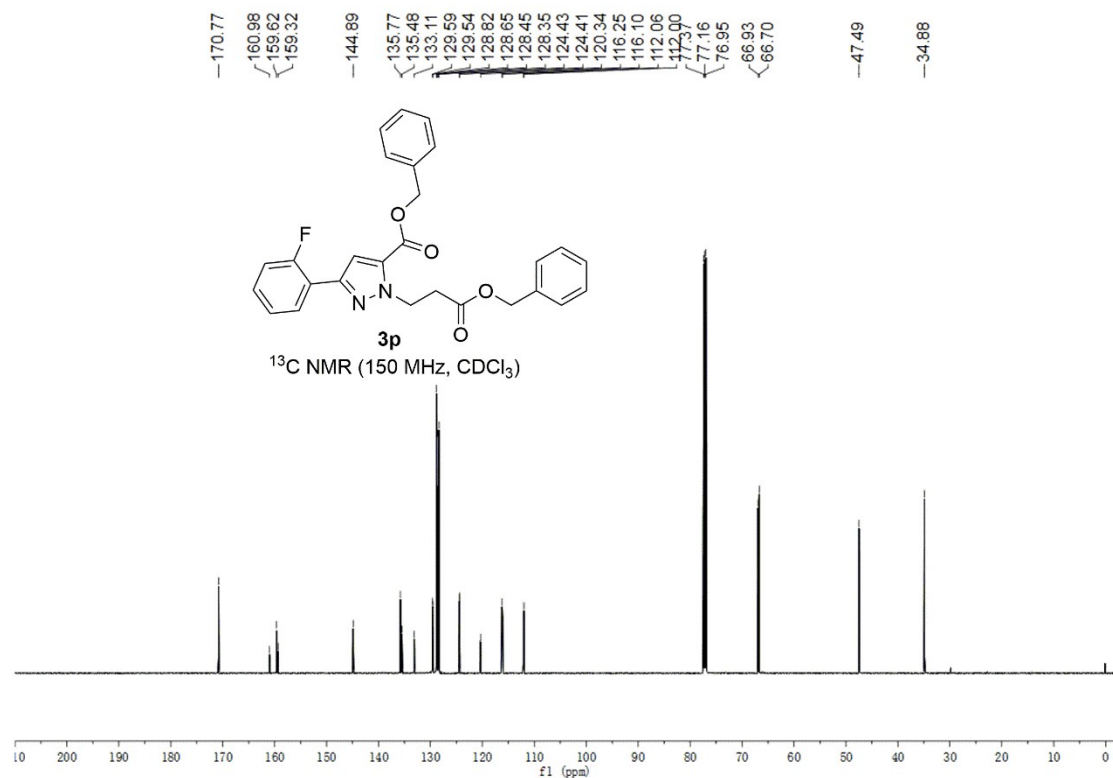

**Benzyl 1-(3-(benzyloxy)-3-oxopropyl)-3-(*m*-tolyl)-1*H*-pyrazole-5-carboxylate (3q): <sup>1</sup>H NMR**

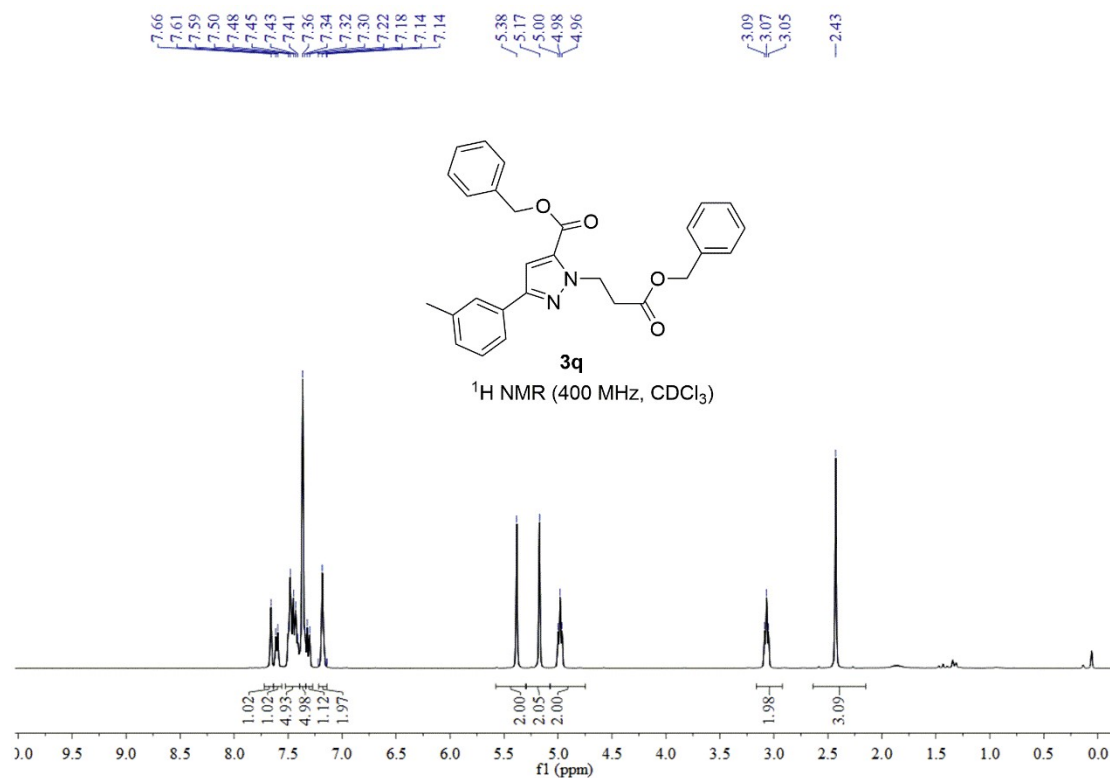

**Benzyl 1-(3-(benzyloxy)-3-oxopropyl)-3-(*m*-tolyl)-1*H*-pyrazole-5-carboxylate (3q): <sup>13</sup>C NMR**

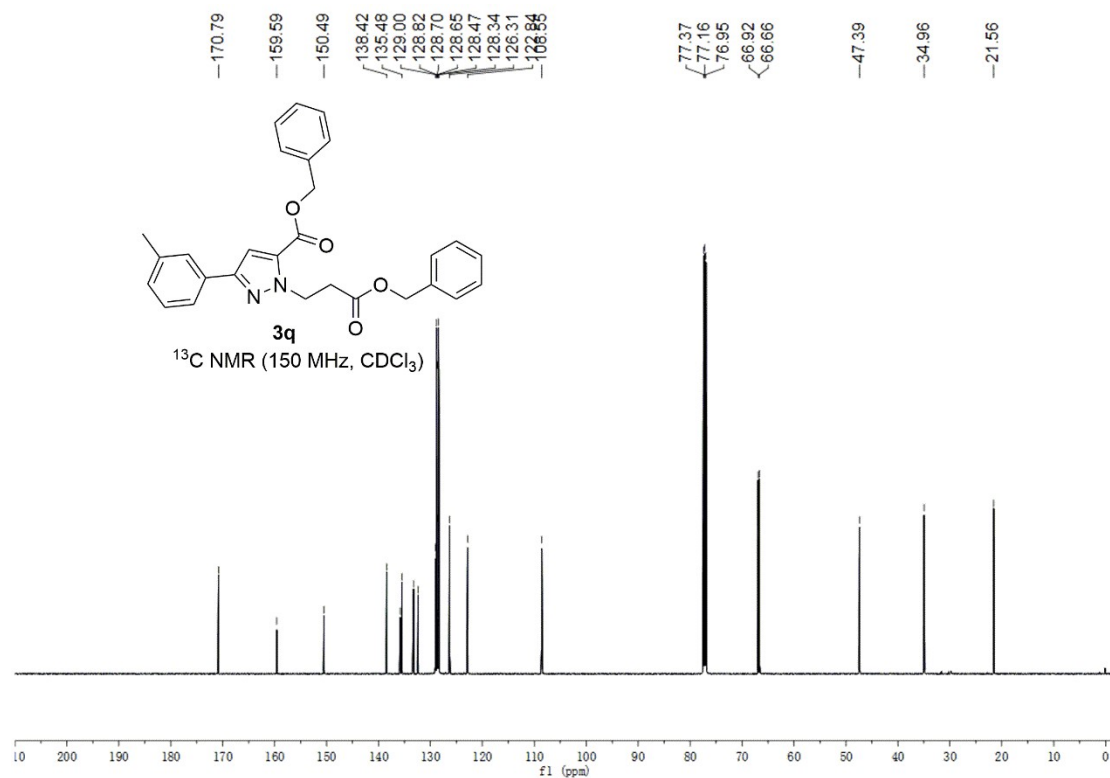

**Benzyl 1-(3-(benzyloxy)-3-oxopropyl)-3-(3-methoxyphenyl)-1H-pyrazole-5-carboxylate (3r): <sup>1</sup>H NMR**

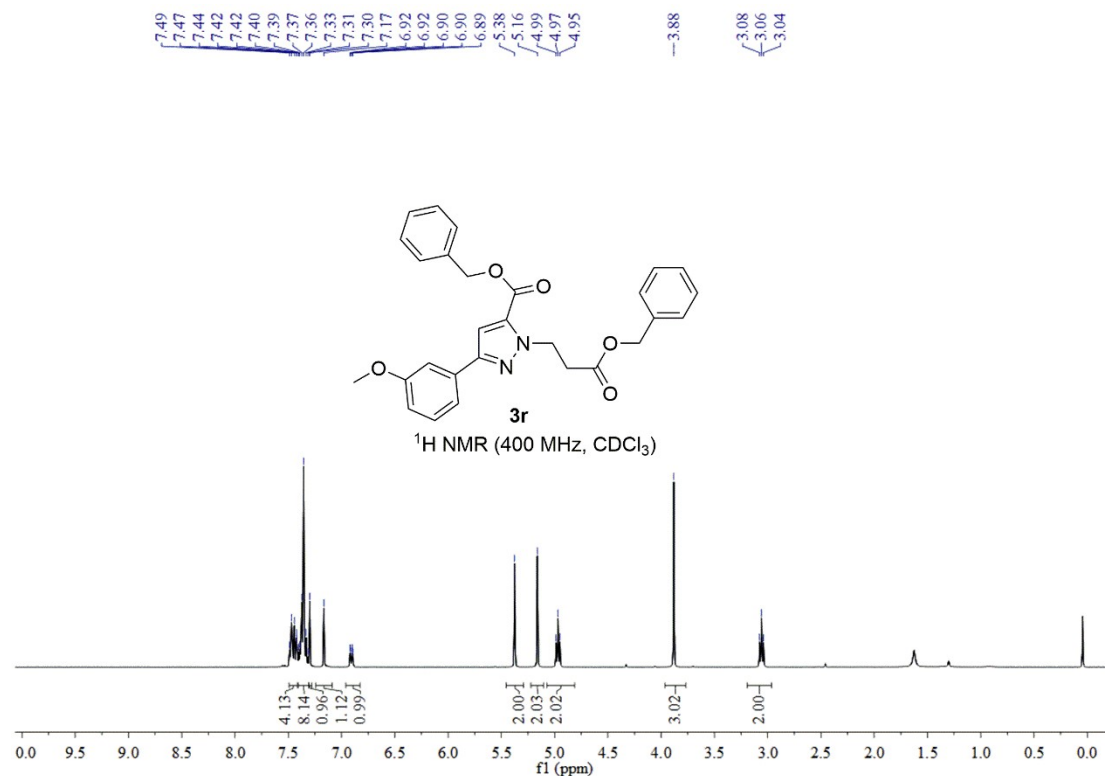

**Benzyl 1-(3-(benzyloxy)-3-oxopropyl)-3-(3-methoxyphenyl)-1H-pyrazole-5-carboxylate (3r): <sup>13</sup>C NMR**

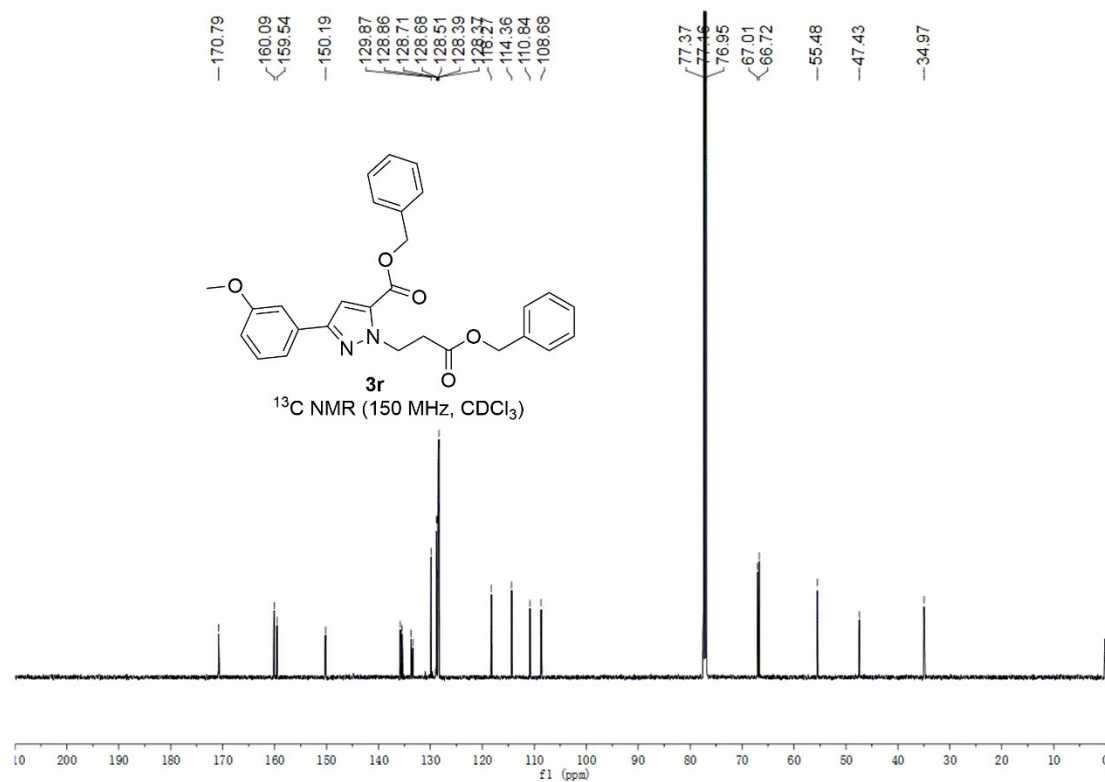

**Benzyl 1-(3-(benzyloxy)-3-oxopropyl)-3-(3-fluorophenyl)-1H-pyrazole-5-carboxylate (3s): <sup>1</sup>H NMR**

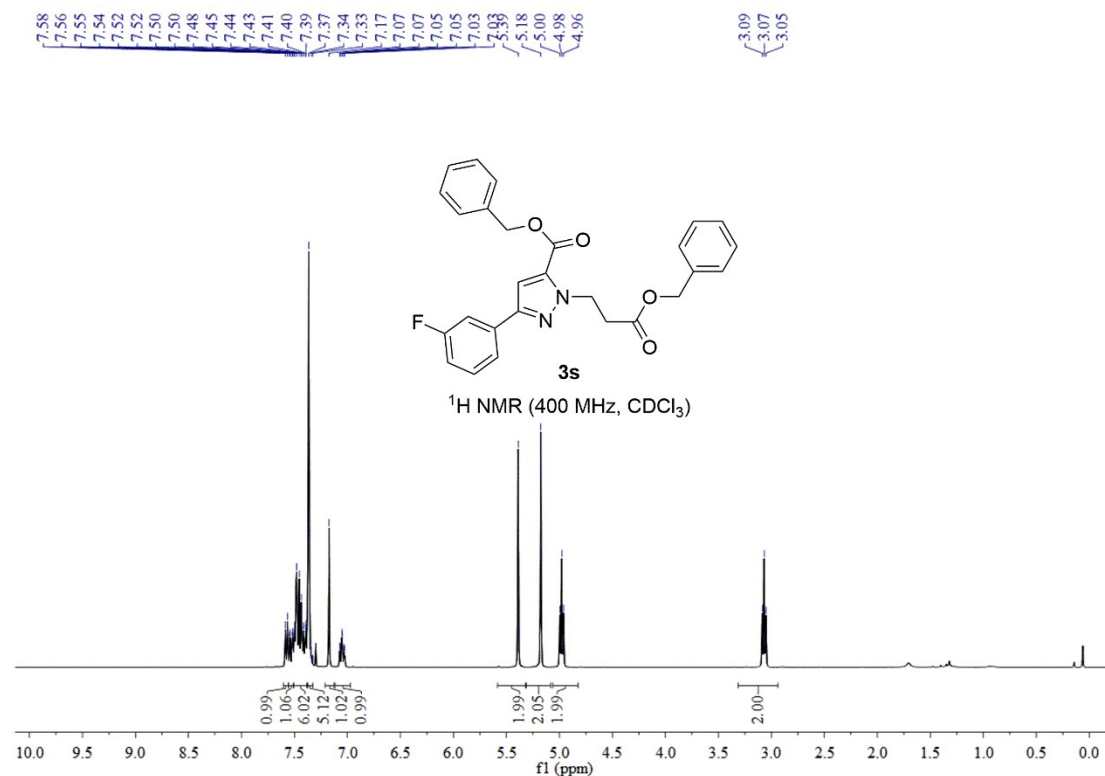

**Benzyl 1-(3-(benzyloxy)-3-oxopropyl)-3-(3-fluorophenyl)-1H-pyrazole-5-carboxylate (3s): <sup>13</sup>C NMR**

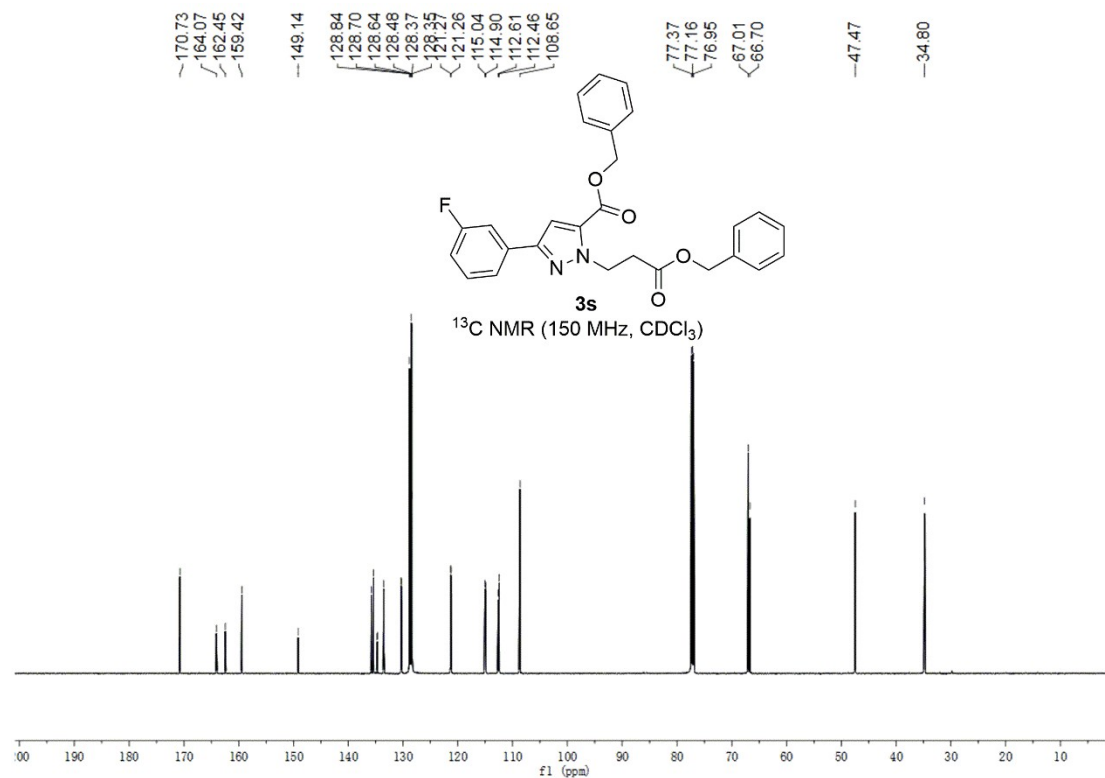

**Benzyl 1-(3-(benzyloxy)-3-oxopropyl)-3-(3-chlorophenyl)-1H-pyrazole-5-carboxylate (3t): <sup>1</sup>H NMR**

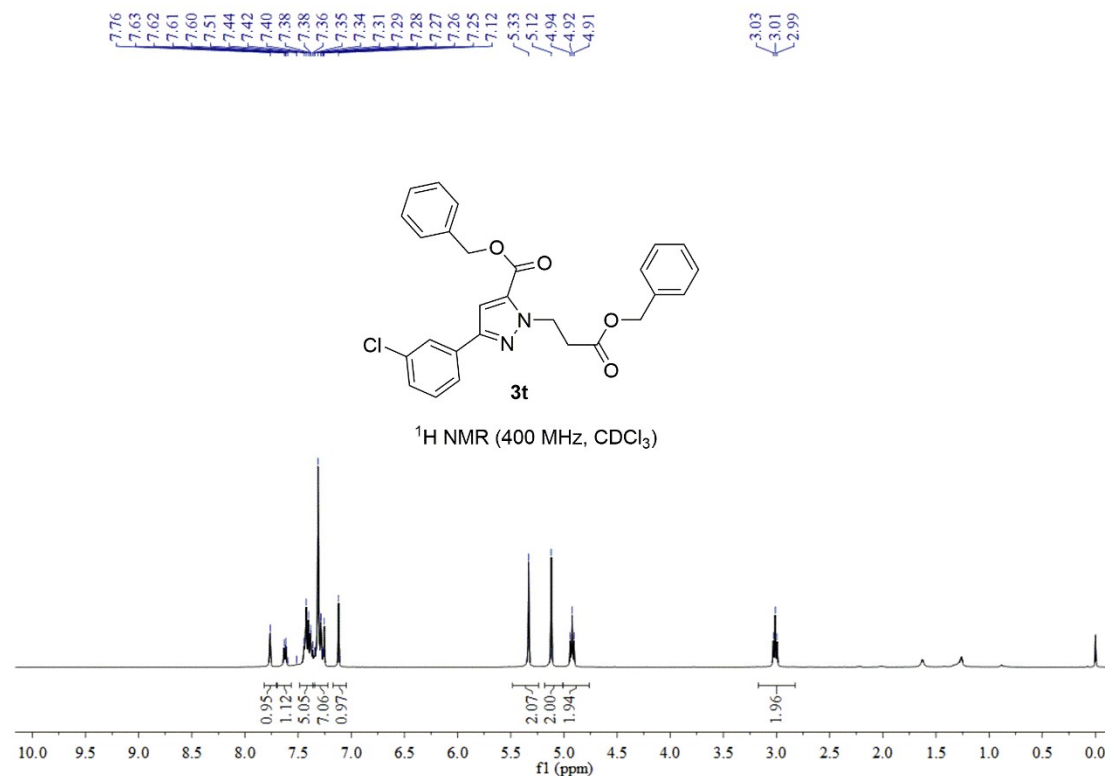

**Benzyl 1-(3-(benzyloxy)-3-oxopropyl)-3-(3-chlorophenyl)-1H-pyrazole-5-carboxylate (3t): <sup>13</sup>C NMR**

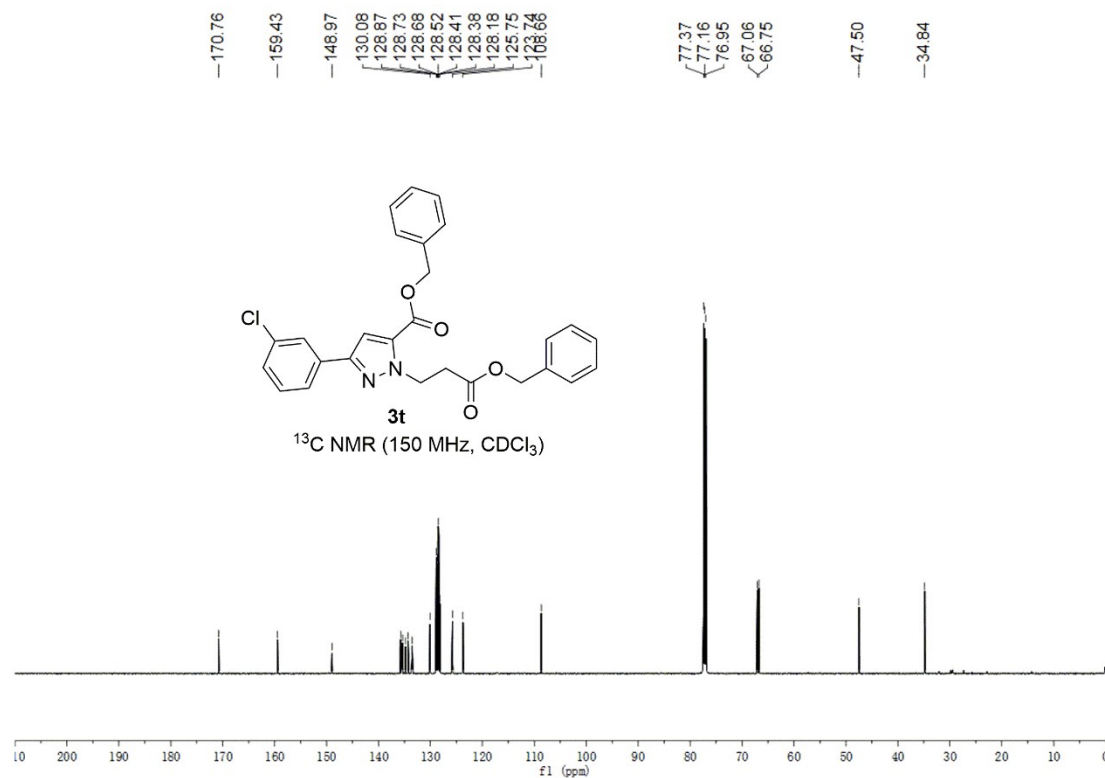



**Benzyl 1-(3-(benzyloxy)-3-oxopropyl)-3-(3-cyanophenyl)-1H-pyrazole-5-carboxylate (3u): <sup>1</sup>H NMR**

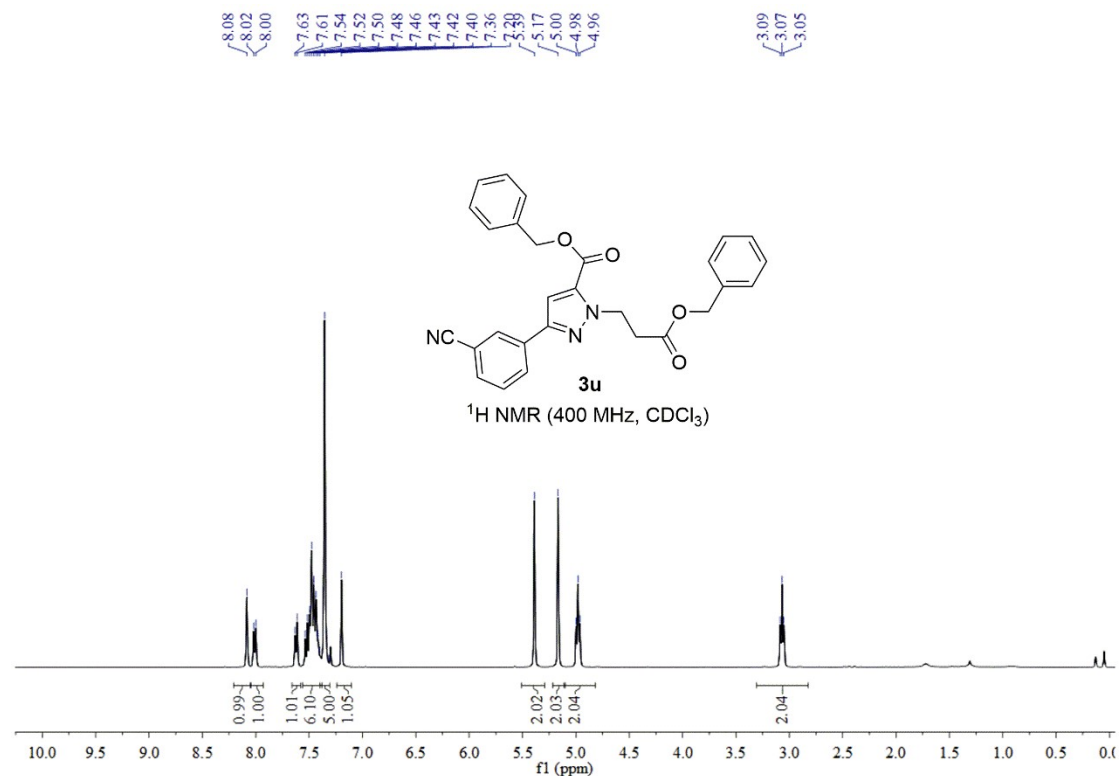

**Benzyl 1-(3-(benzyloxy)-3-oxopropyl)-3-(3-cyanophenyl)-1H-pyrazole-5-carboxylate (3u): <sup>13</sup>C NMR**

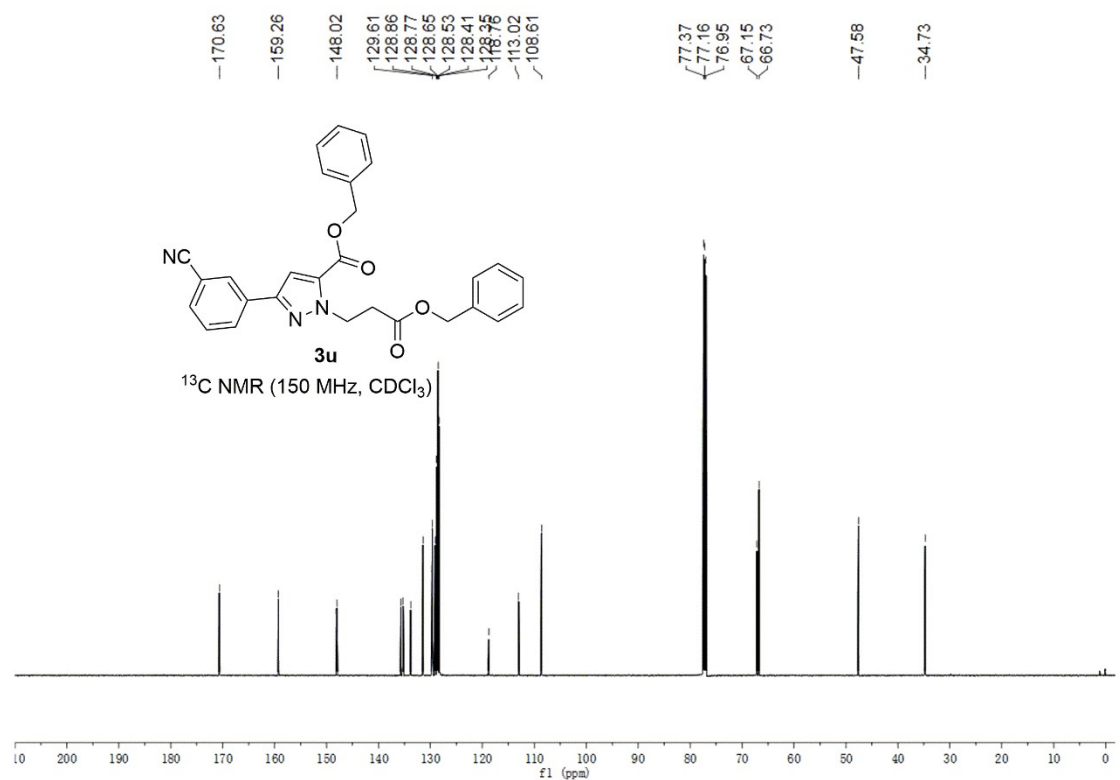

**Benzyl 1-(3-(benzyloxy)-3-oxopropyl)-3-(3-(trifluoromethyl)phenyl)-1H-pyrazole-5-carboxylate (3v): <sup>1</sup>H NMR**

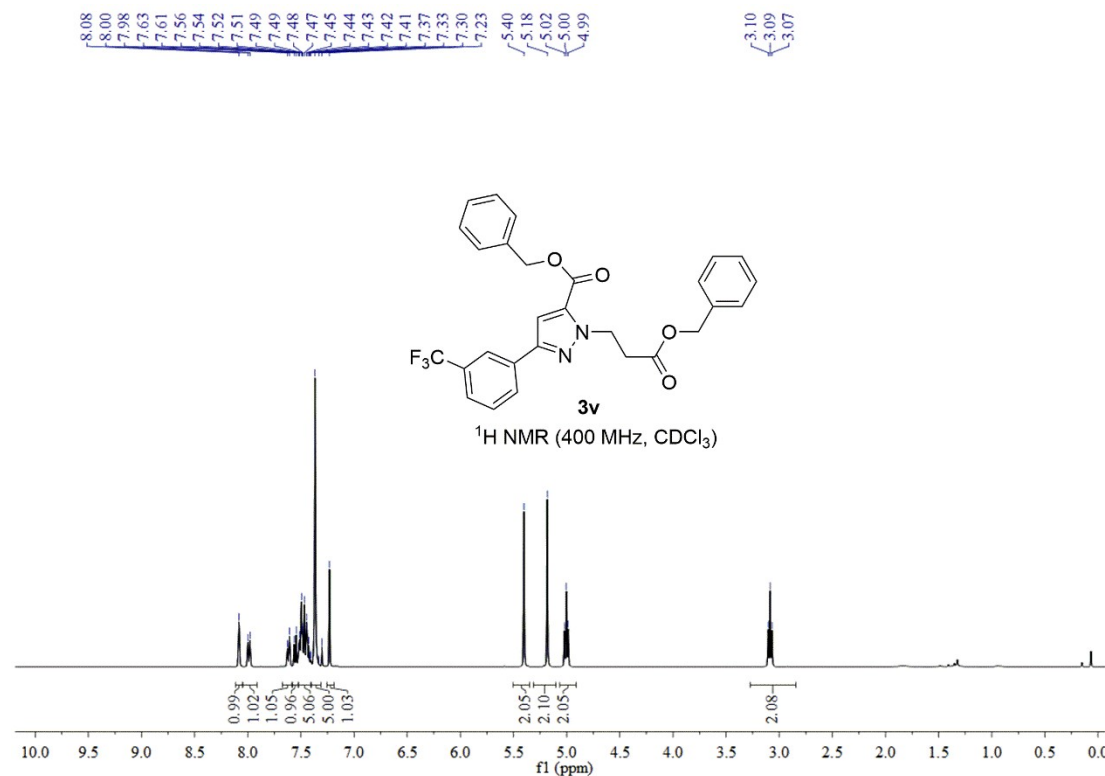

**Benzyl 1-(3-(benzyloxy)-3-oxopropyl)-3-(3-(trifluoromethyl)phenyl)-1H-pyrazole-5-carboxylate (3v): <sup>13</sup>C NMR**

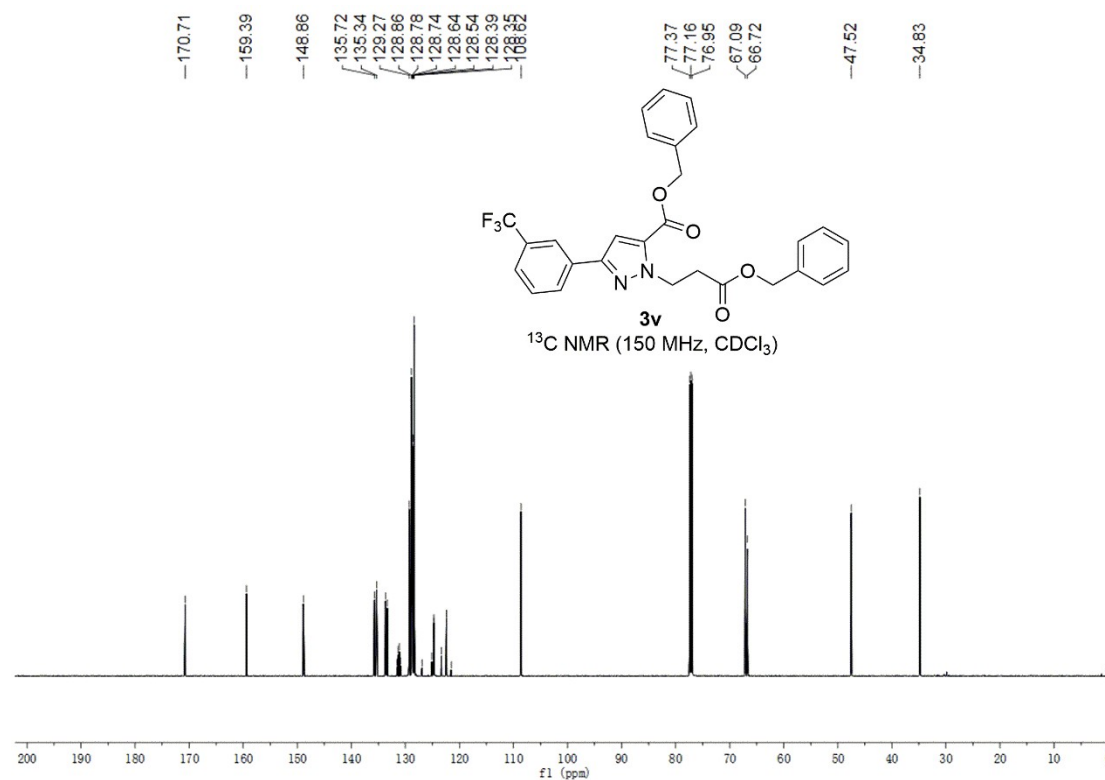

**Benzyl 1-(3-(benzyloxy)-3-oxopropyl)-3-(4-nitrophenyl)-1H-pyrazole-5-carboxylate (3w): <sup>1</sup>H NMR**

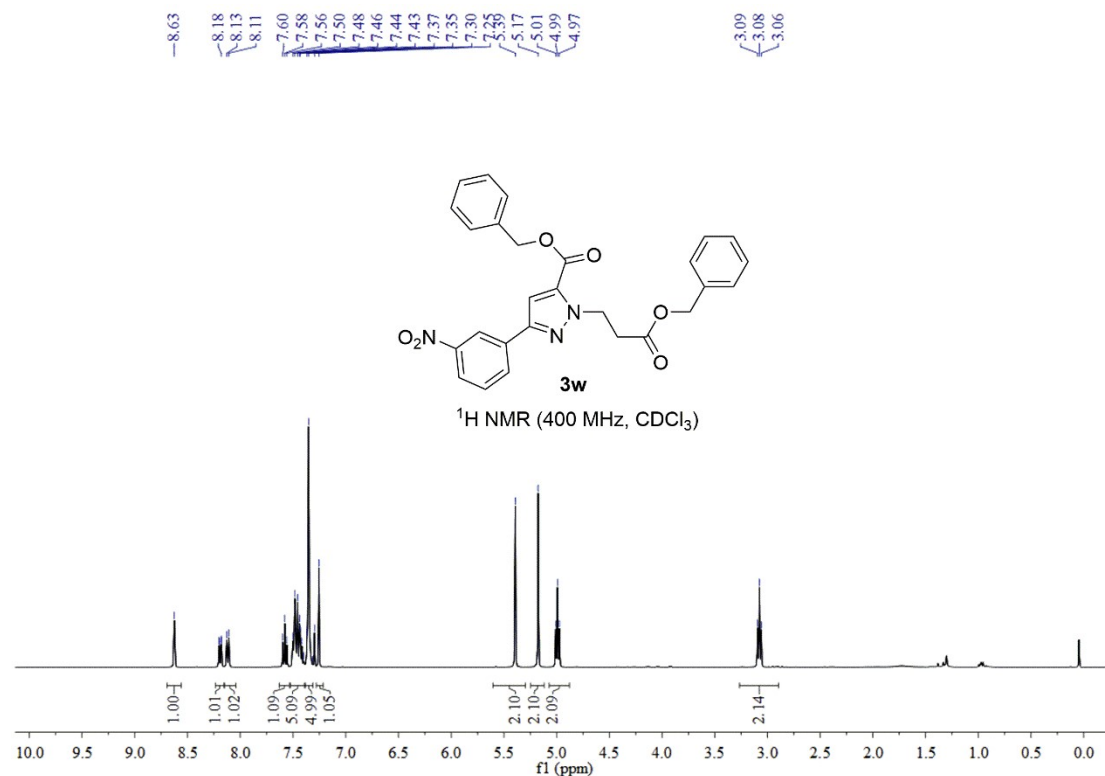

**Benzyl 1-(3-(benzyloxy)-3-oxopropyl)-3-(4-nitrophenyl)-1H-pyrazole-5-carboxylate (3w): <sup>13</sup>C NMR**

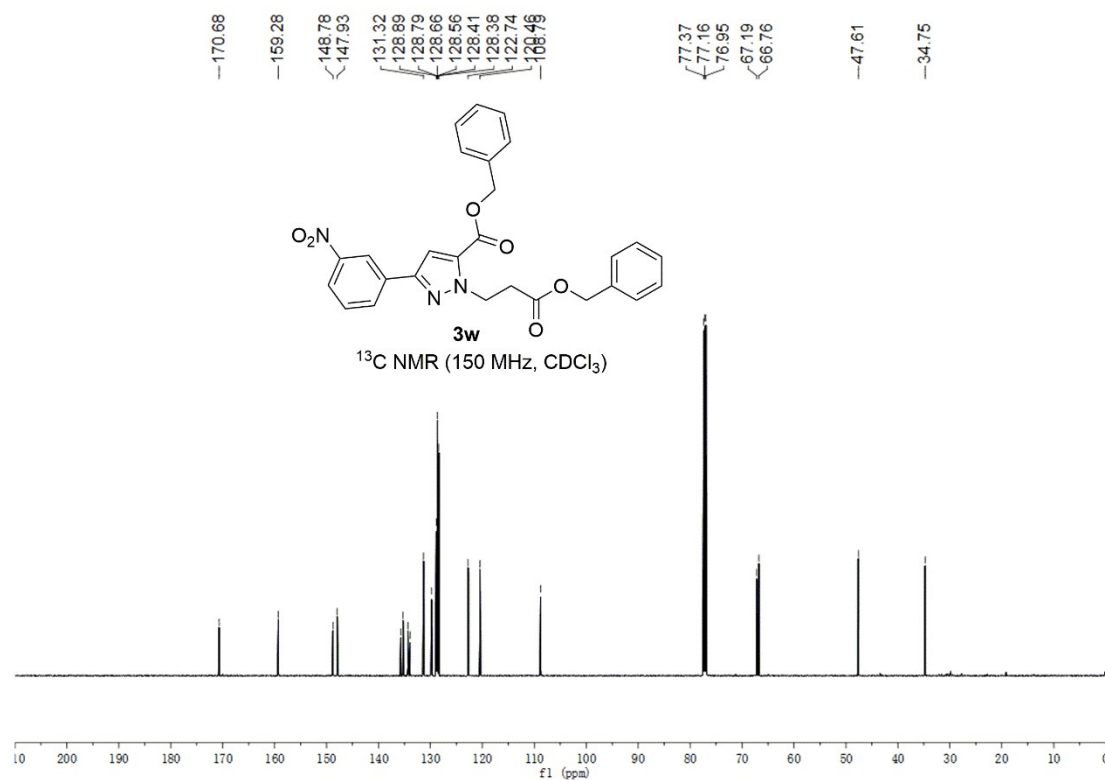

**Benzyl 1-(3-(benzyloxy)-3-oxopropyl)-3-(4-chloro-3-fluorophenyl)-1H-pyrazole-5-carboxylate (3x): <sup>1</sup>H NMR**

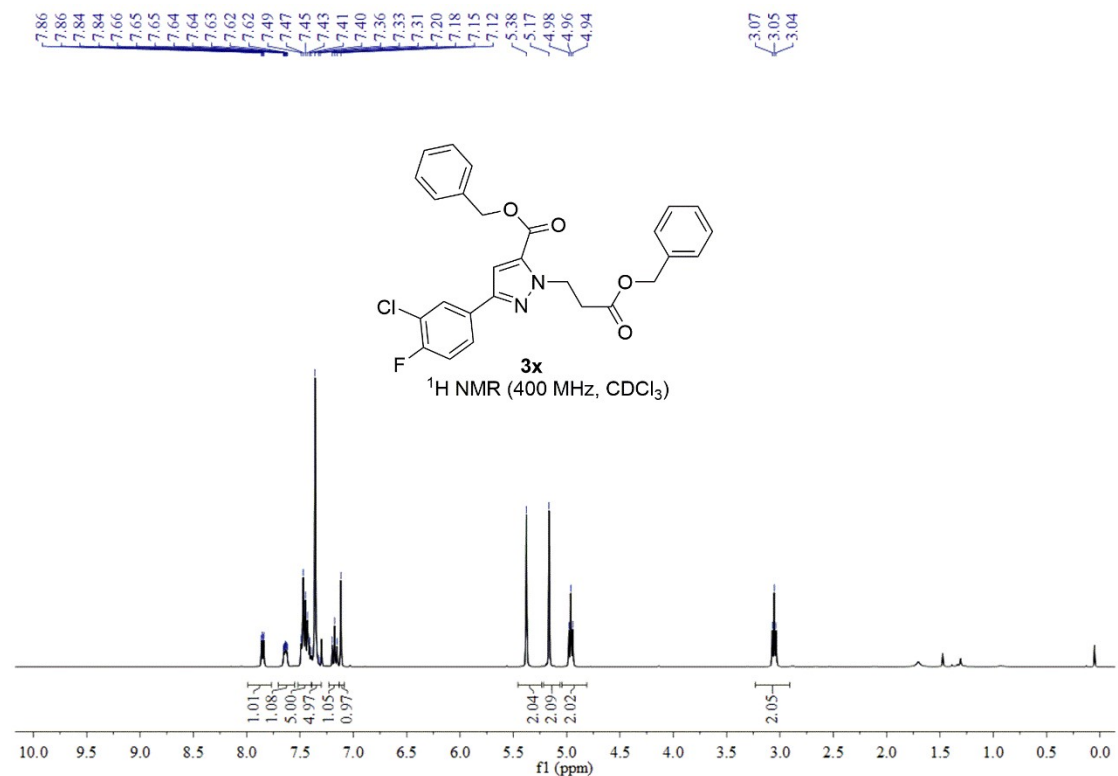

**Benzyl 1-(3-(benzyloxy)-3-oxopropyl)-3-(4-chloro-3-fluorophenyl)-1H-pyrazole-5-carboxylate (3x): <sup>13</sup>C NMR**

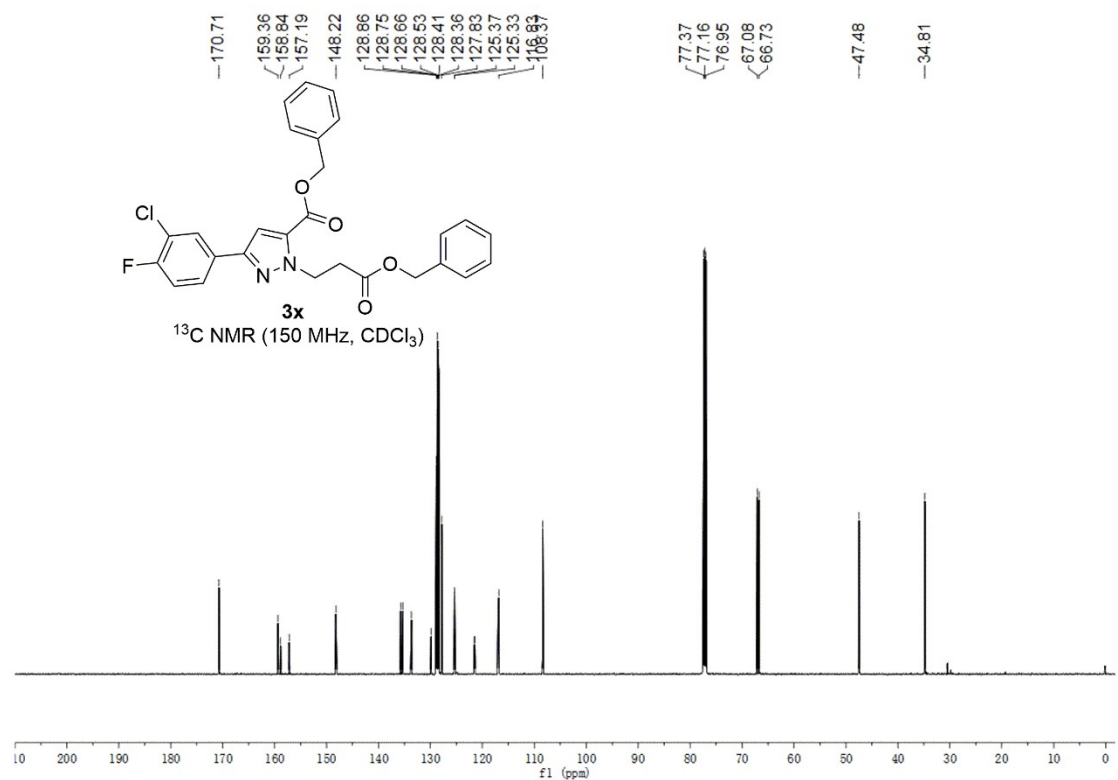

**Benzyl 1-(3-(benzyloxy)-3-oxopropyl)-3-(naphthalen-2-yl)-1H-pyrazole-5-carboxylate (3y): <sup>1</sup>H NMR**

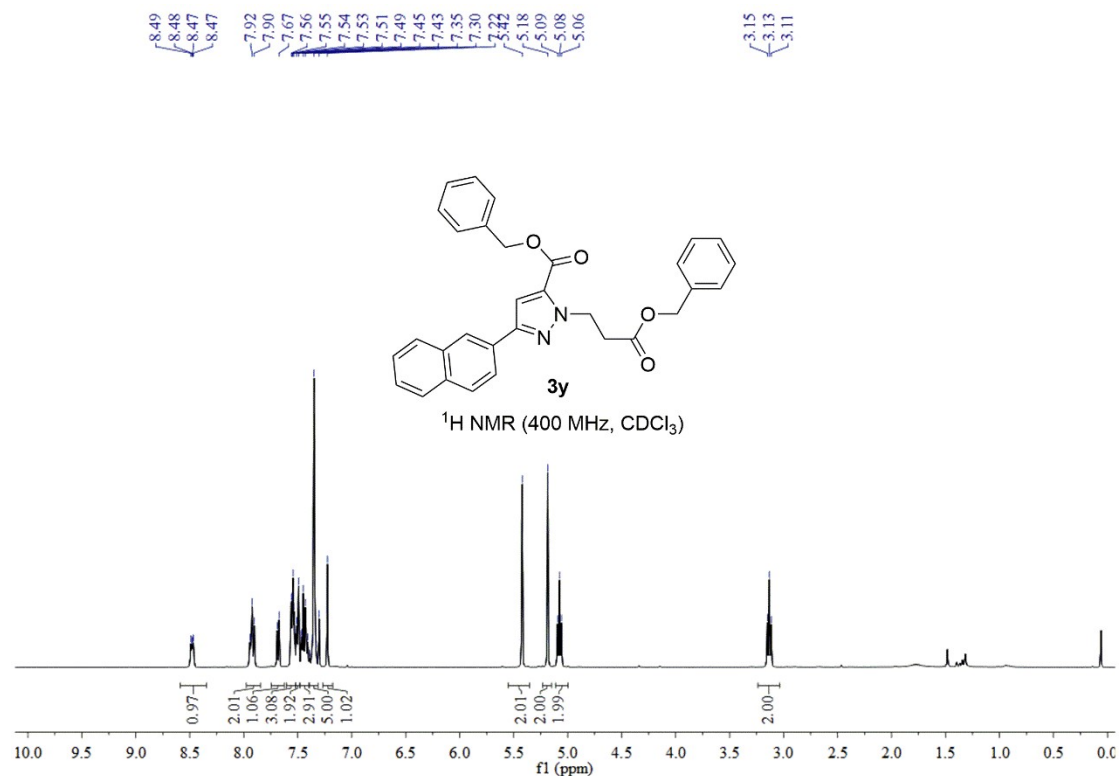

**Benzyl 1-(3-(benzyloxy)-3-oxopropyl)-3-(naphthalen-2-yl)-1H-pyrazole-5-carboxylate (3y): <sup>13</sup>C NMR**

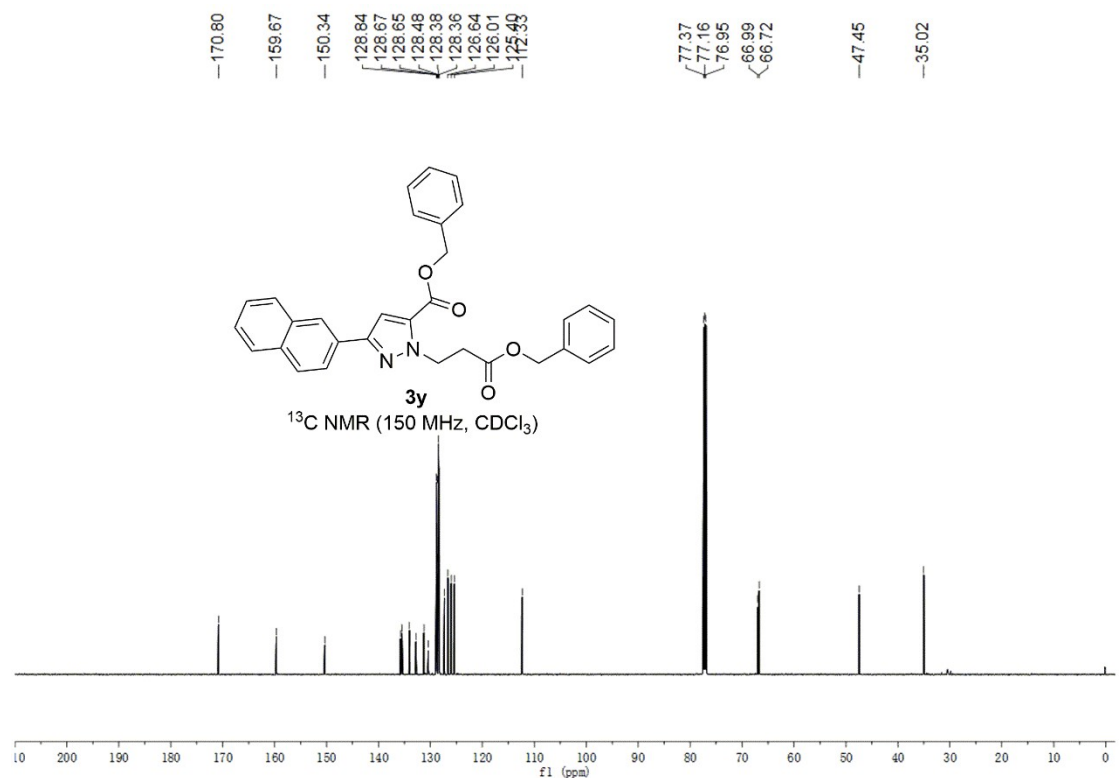

**Benzyl 1-(3-(benzyloxy)-3-oxopropyl)-3-(thiophen-2-yl)-1H-pyrazole-5-carboxylate (3z): <sup>1</sup>H NMR**

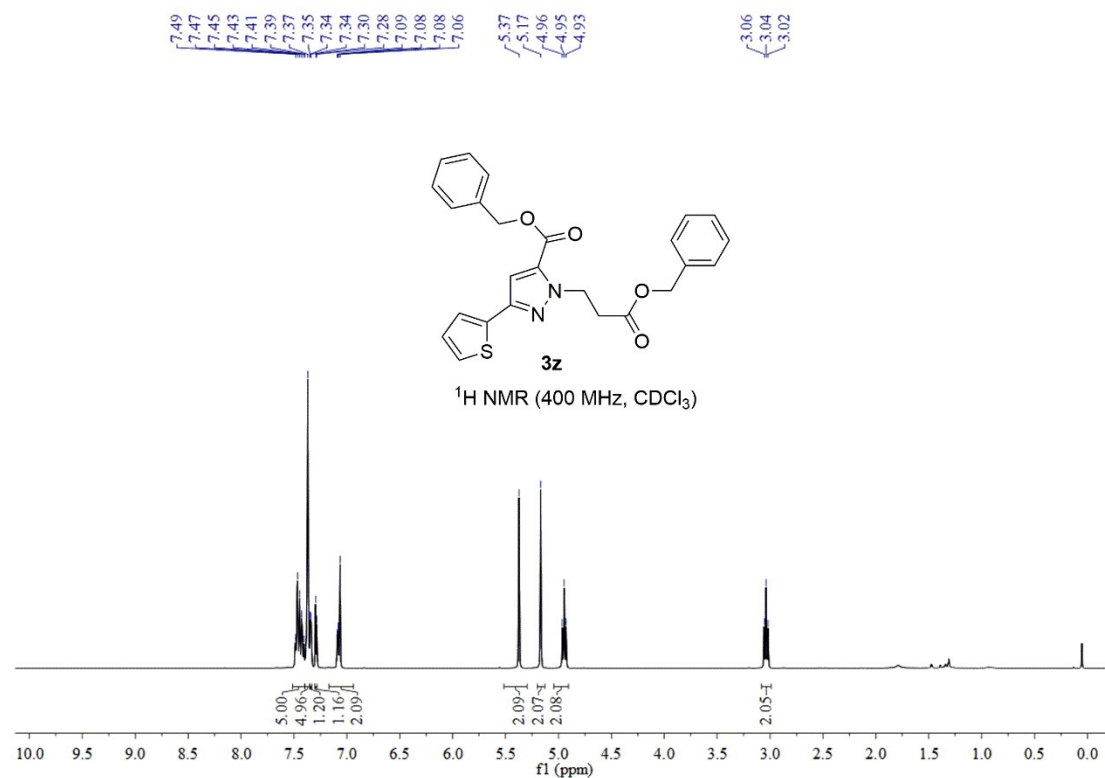

**Benzyl 1-(3-(benzyloxy)-3-oxopropyl)-3-(thiophen-2-yl)-1H-pyrazole-5-carboxylate (3z): <sup>13</sup>C NMR**

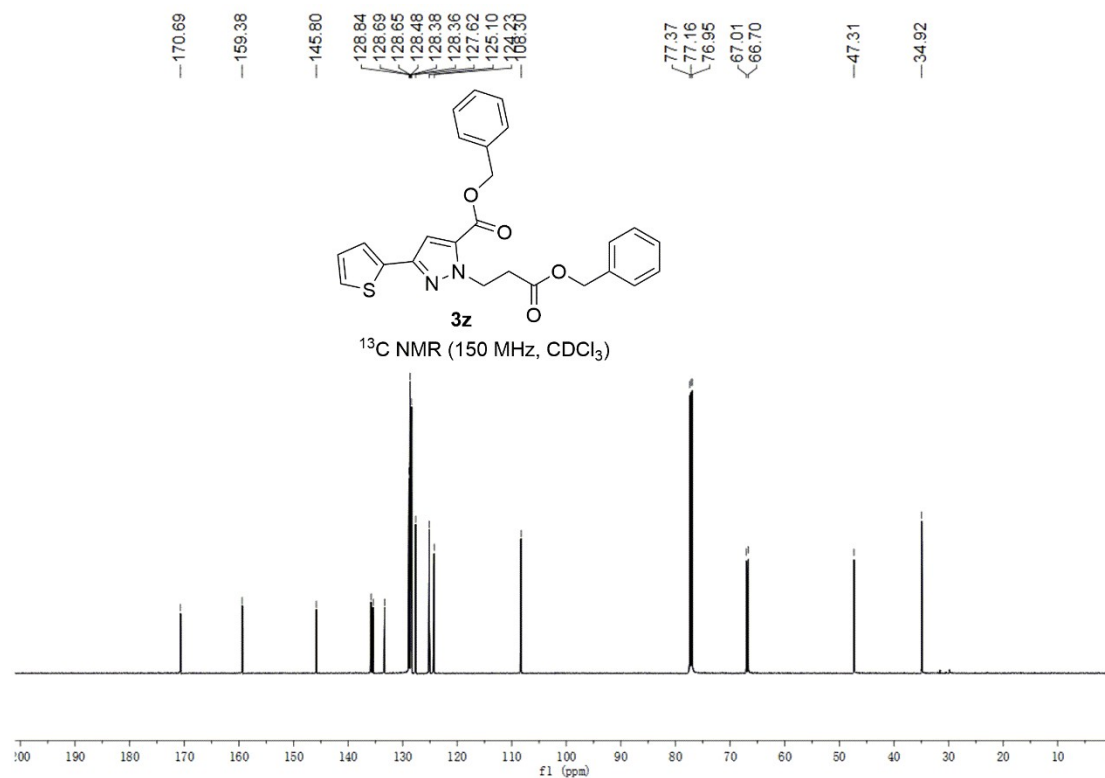

Methyl 1-(3-methoxy-3-oxopropyl)-3-phenyl-1H-pyrazole-5-carboxylate (4a): <sup>1</sup>H NMR

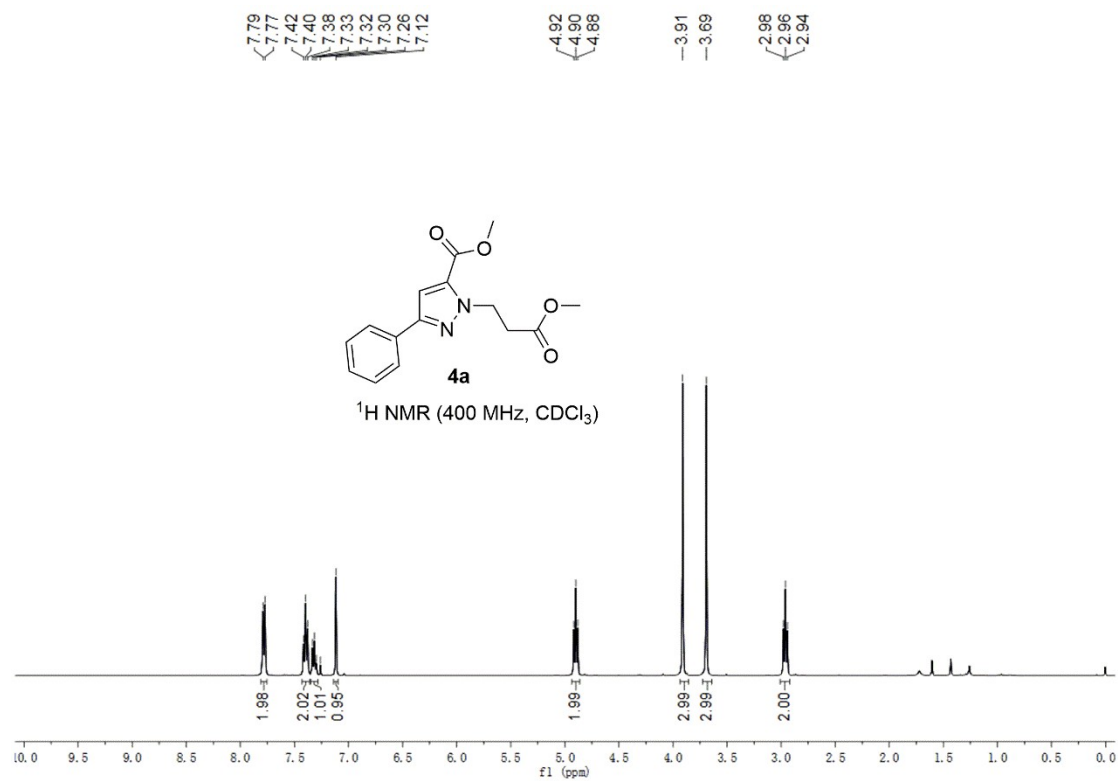

Methyl 1-(3-methoxy-3-oxopropyl)-3-phenyl-1H-pyrazole-5-carboxylate (4a): <sup>13</sup>C NMR

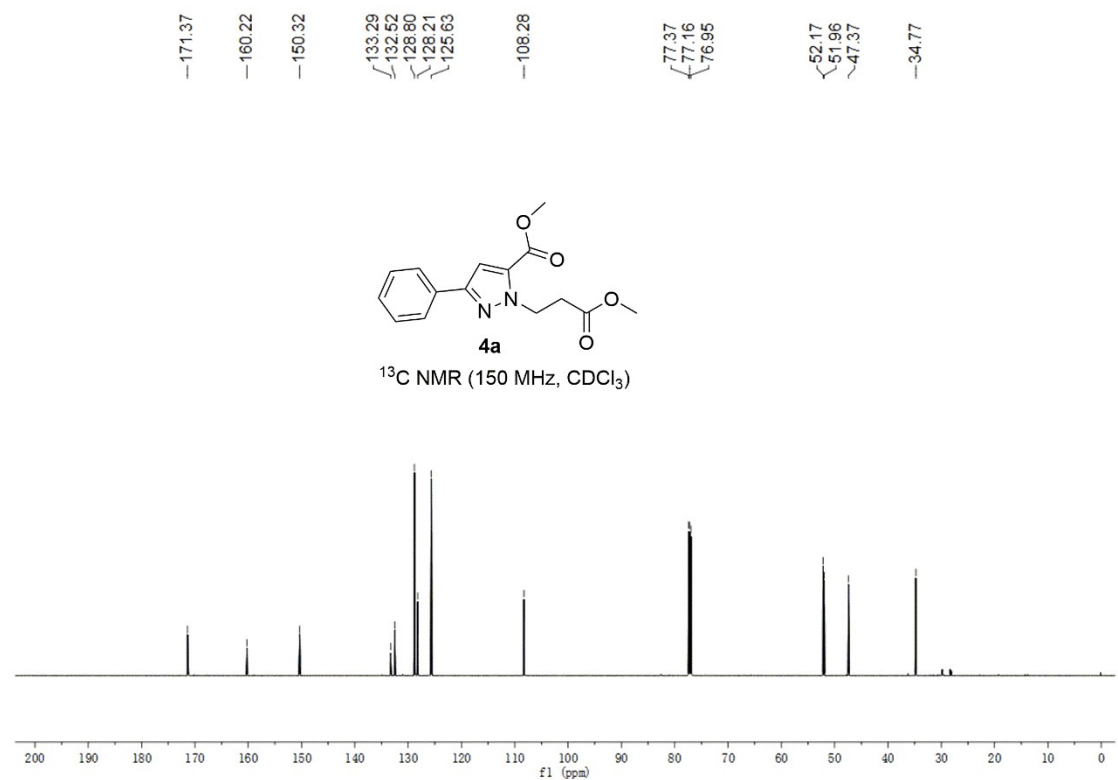

Ethyl 1-(3-ethoxy-3-oxopropyl)-3-phenyl-1H-pyrazole-5-carboxylate (4b): <sup>1</sup>H NMR

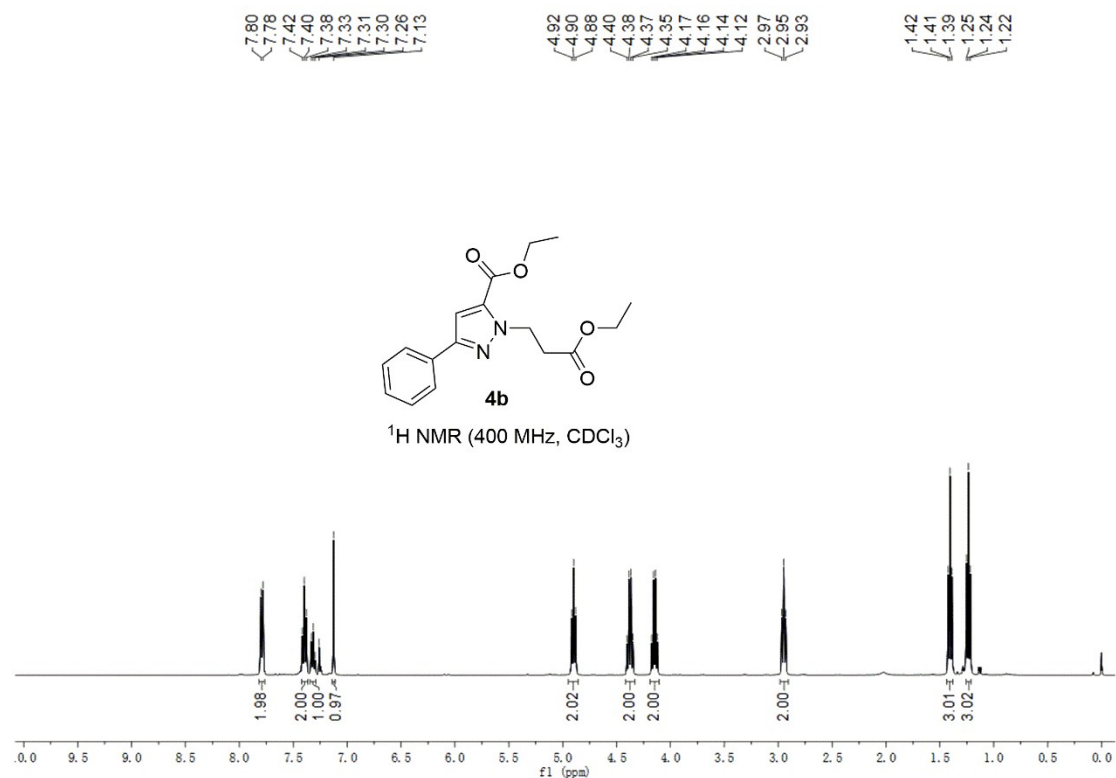

Ethyl 1-(3-ethoxy-3-oxopropyl)-3-phenyl-1H-pyrazole-5-carboxylate (4b): <sup>13</sup>C NMR

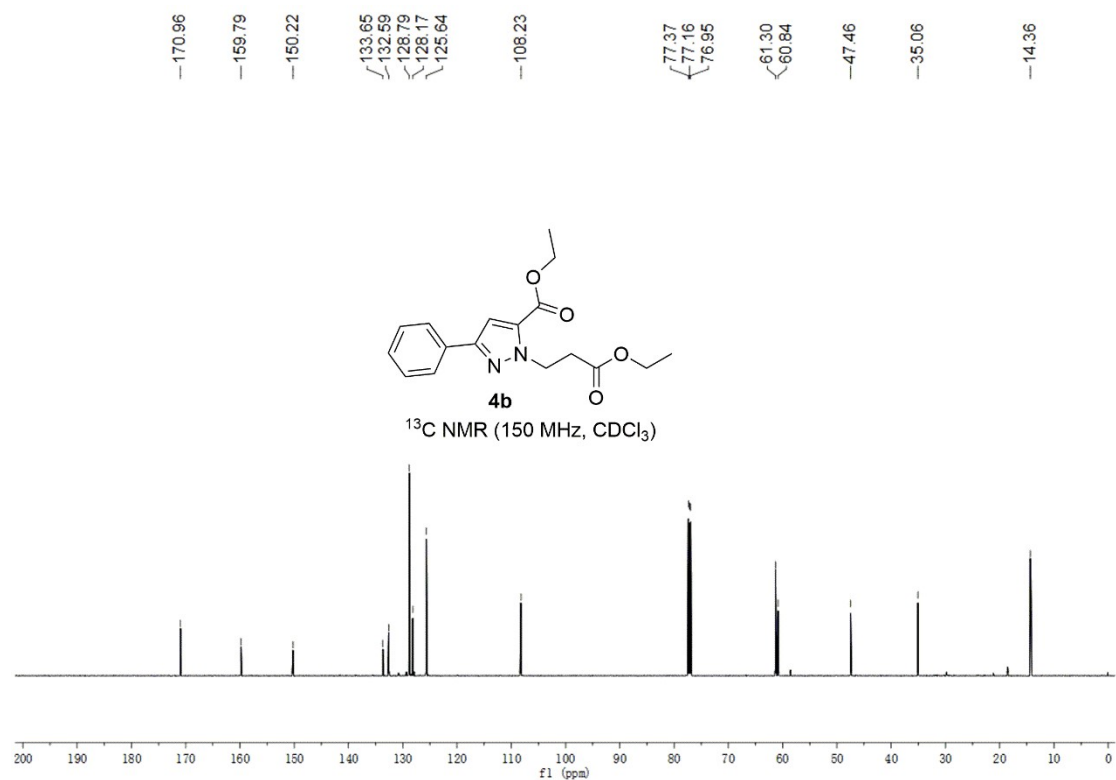



**Butyl 1-(3-butoxy-3-oxopropyl)-3-phenyl-1H-pyrazole-5-carboxylate (4c): <sup>1</sup>H NMR**

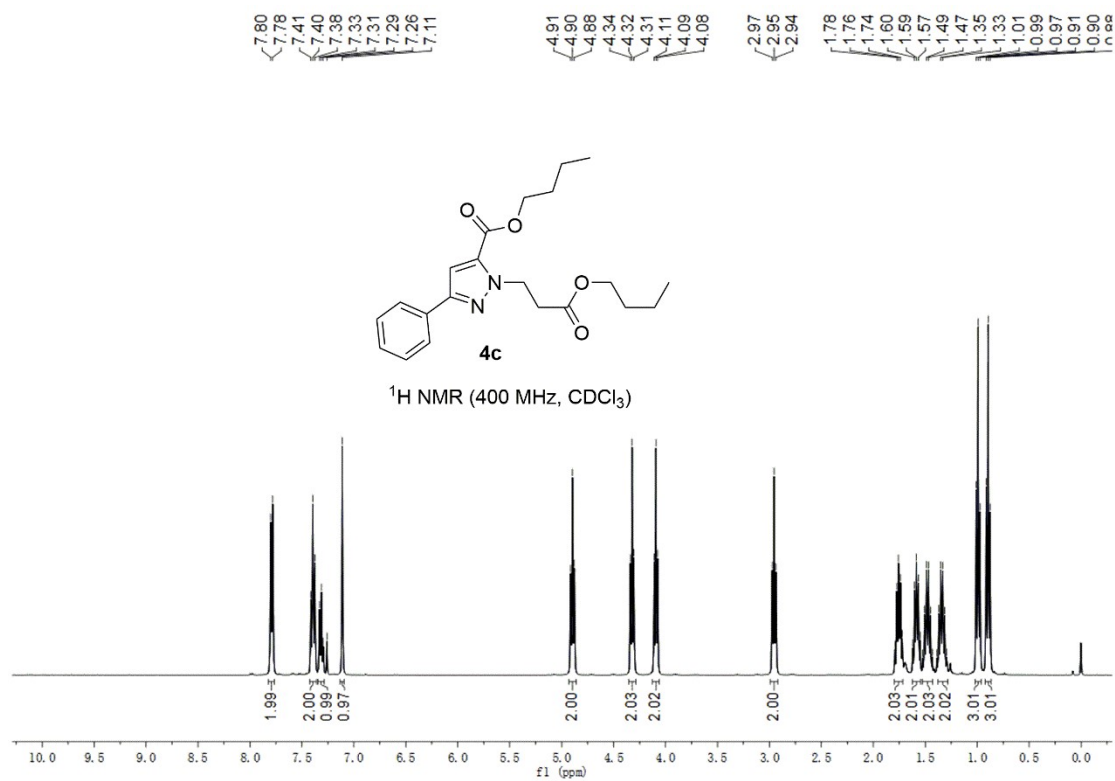

**Butyl 1-(3-butoxy-3-oxopropyl)-3-phenyl-1H-pyrazole-5-carboxylate (4c): <sup>13</sup>C NMR**

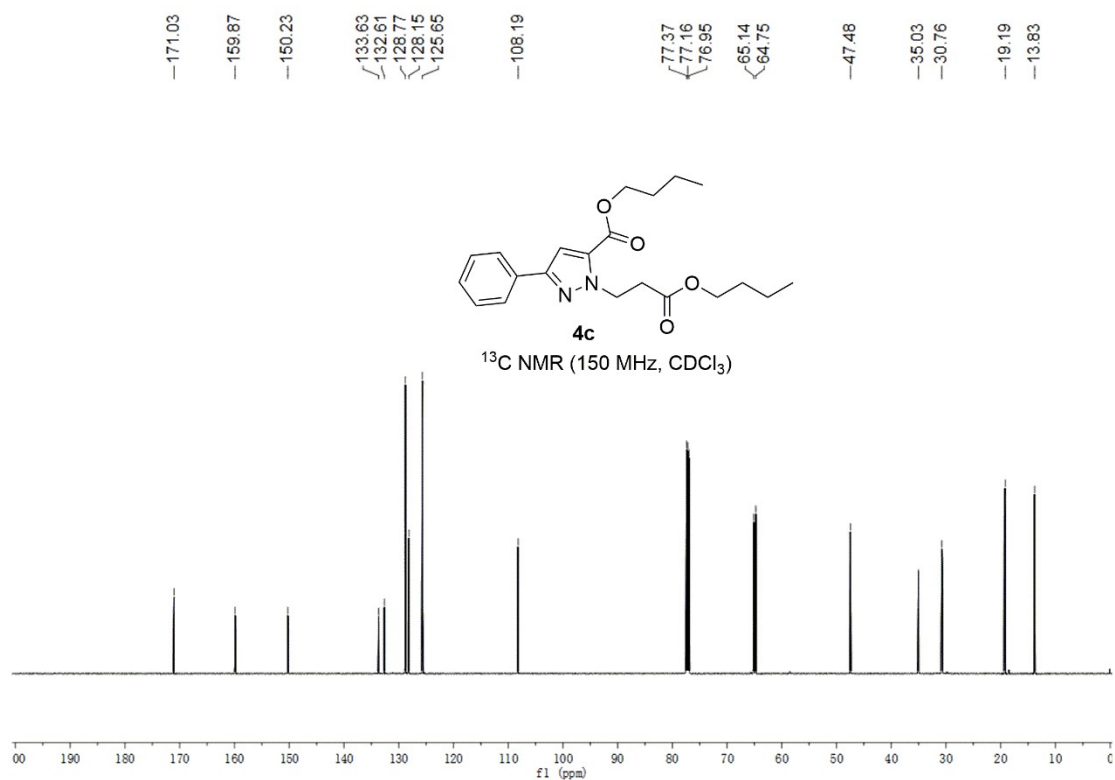

**Allyl 1-(3-(allyloxy)-3-oxopropyl)-3-phenyl-1H-pyrazole-5-carboxylate (4d): <sup>1</sup>H NMR**

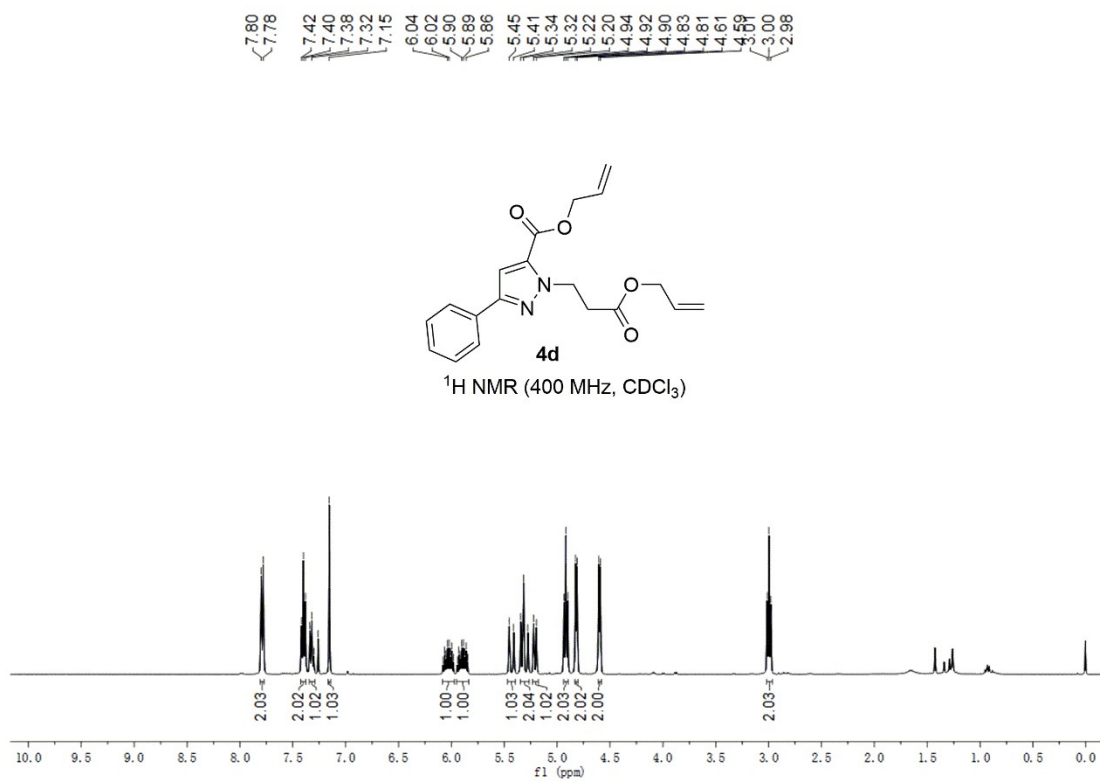

**Allyl 1-(3-(allyloxy)-3-oxopropyl)-3-phenyl-1H-pyrazole-5-carboxylate (4d): <sup>13</sup>C NMR**

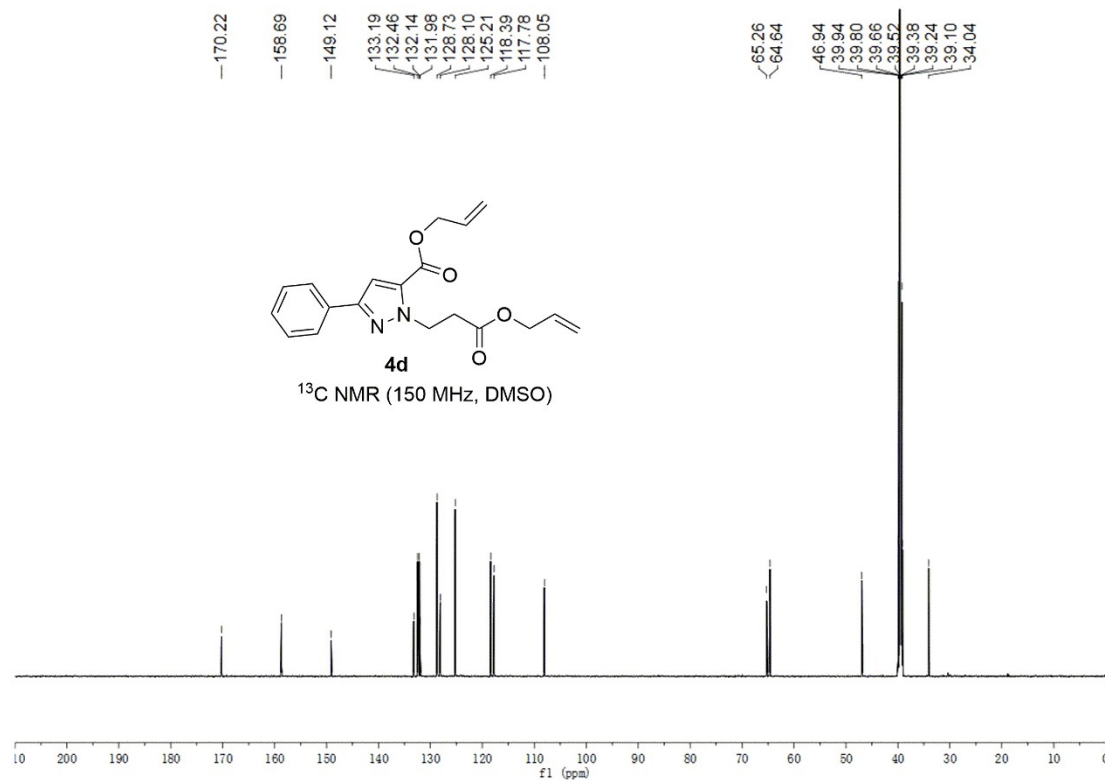

**Cyclohexyl 1-(3-(cyclohexyloxy)-3-oxopropyl)-3-phenyl-1H-pyrazole-5-carboxylate (4e): <sup>1</sup>H NMR**

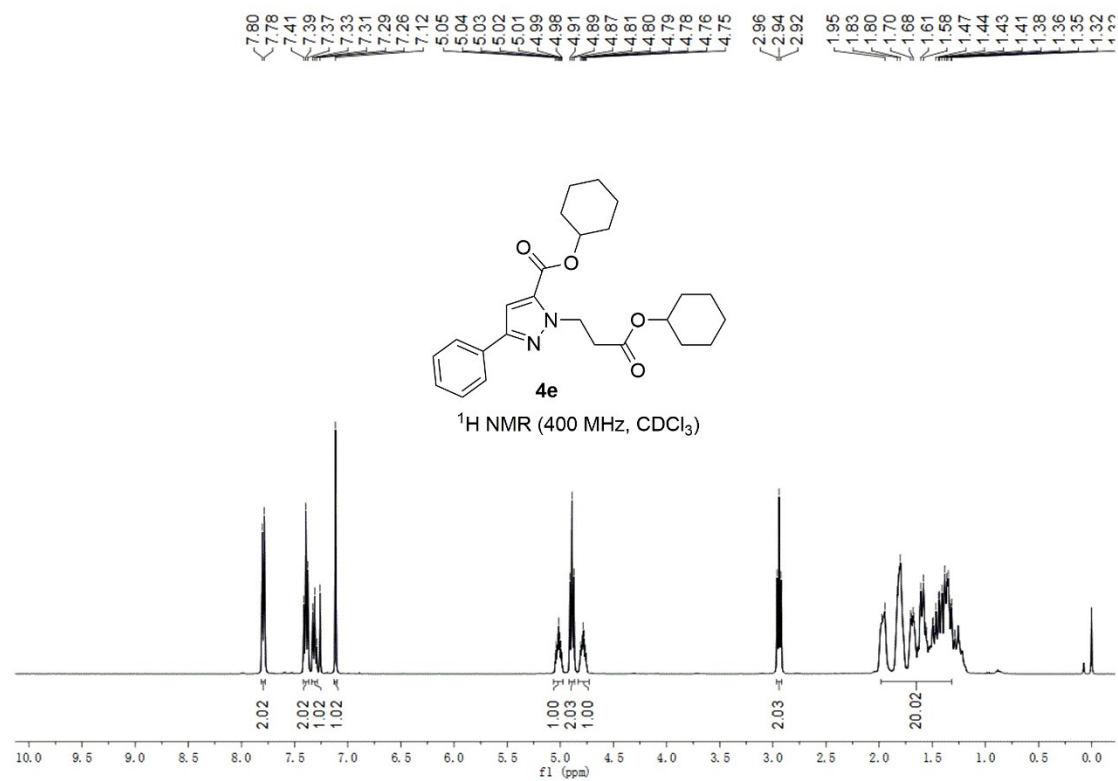

**Cyclohexyl 1-(3-(cyclohexyloxy)-3-oxopropyl)-3-phenyl-1H-pyrazole-5-carboxylate (4e): <sup>13</sup>C NMR**

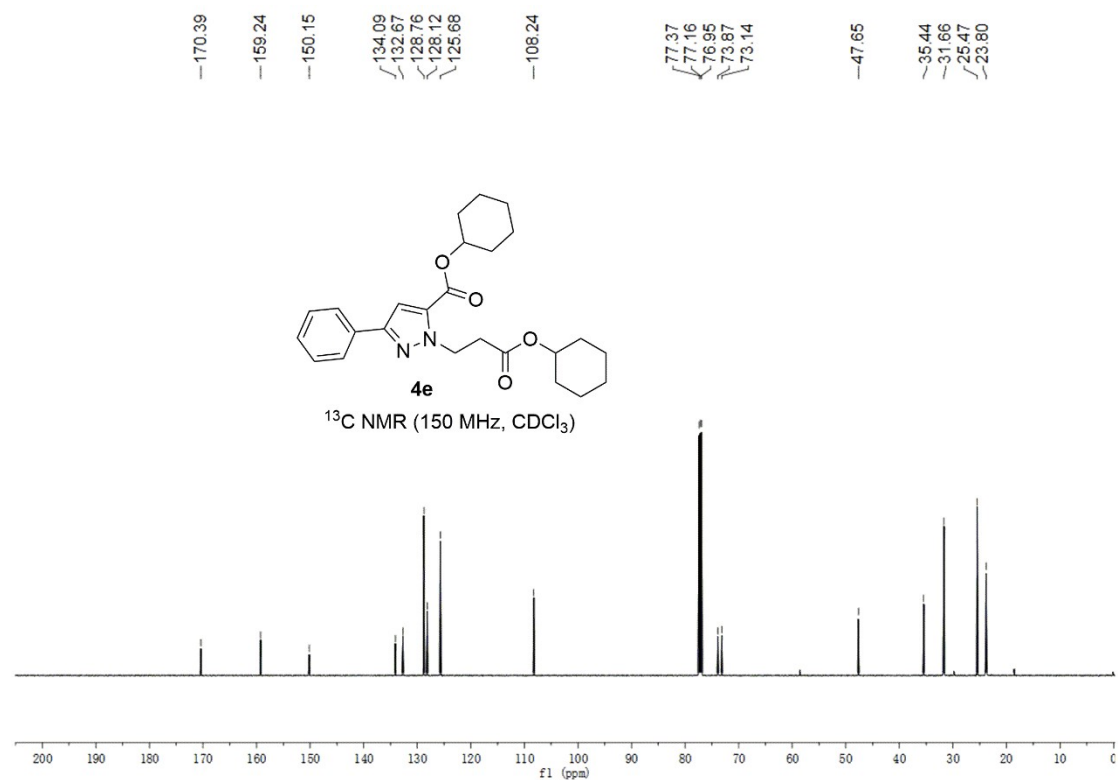

**Tert-butyl 1-(3-(tert-butoxy)-3-oxopropyl)-3-phenyl-1H-pyrazole-5-carboxylate (4f): <sup>1</sup>H NMR**

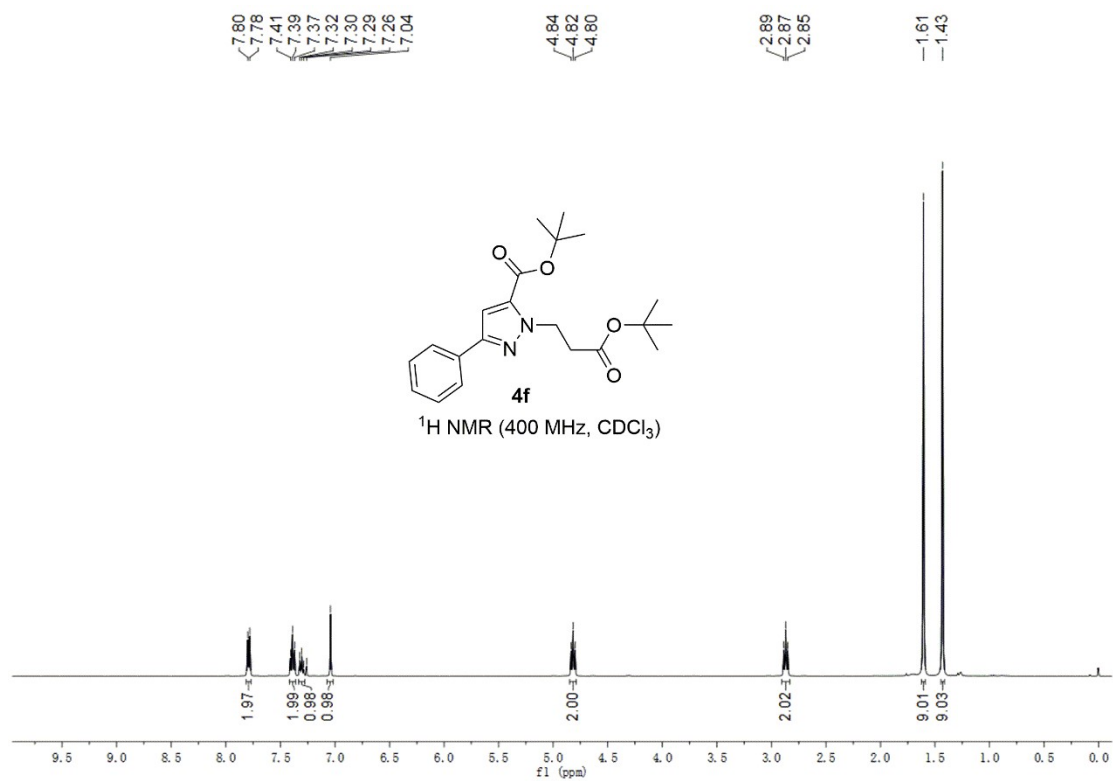

**Tert-butyl 1-(3-(tert-butoxy)-3-oxopropyl)-3-phenyl-1H-pyrazole-5-carboxylate (4f): <sup>13</sup>C NMR**

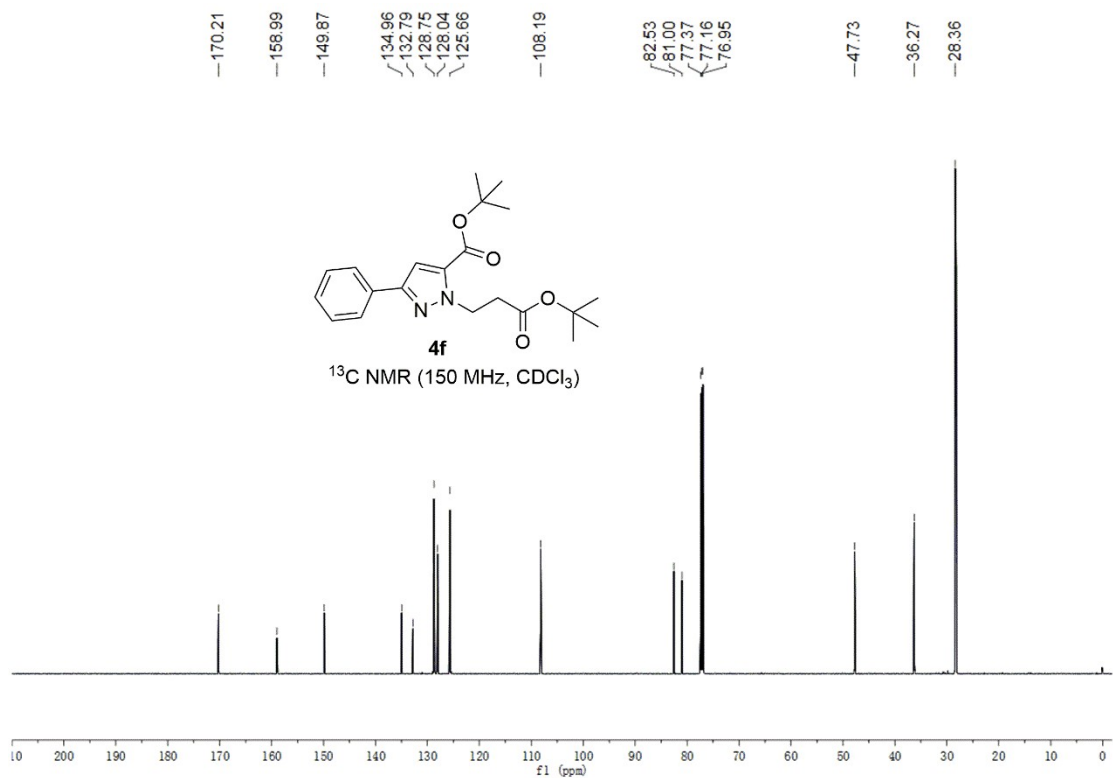

**Benzyl (E)-3-(2-benzylidene-1-tosylhydrazinyl)propanoate (5): <sup>1</sup>H NMR**

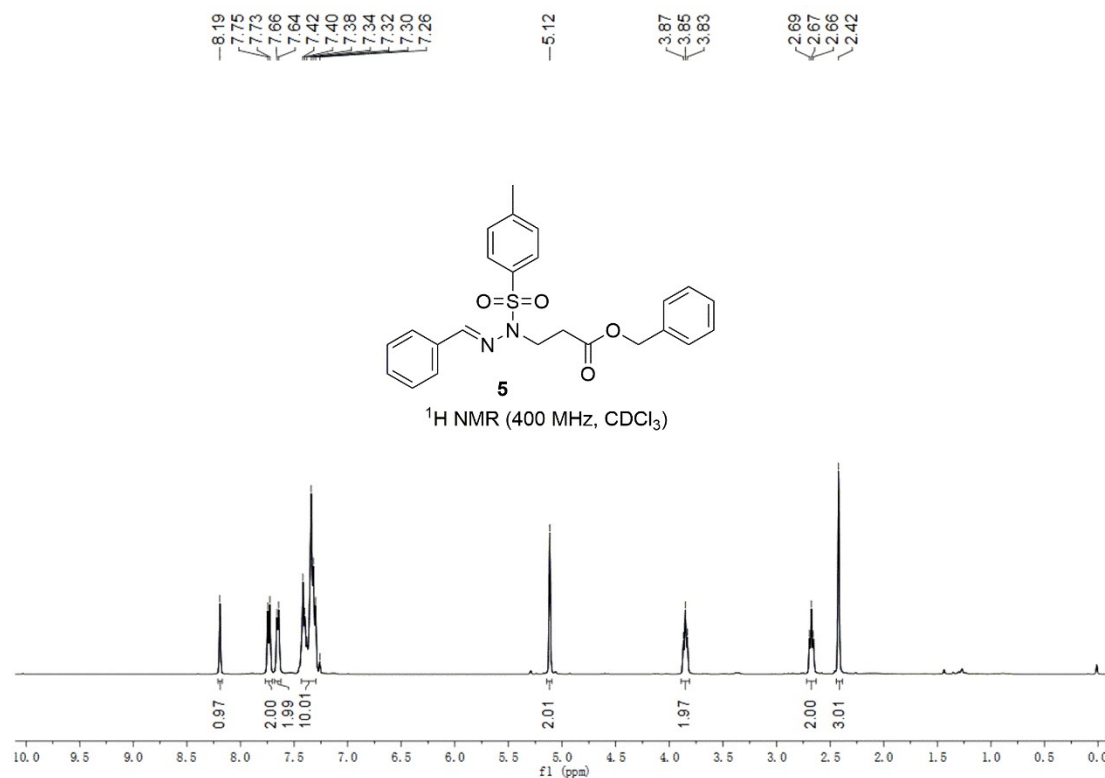

**Benzyl (E)-3-(2-benzylidene-1-tosylhydrazinyl)propanoate (5): <sup>13</sup>C NMR**

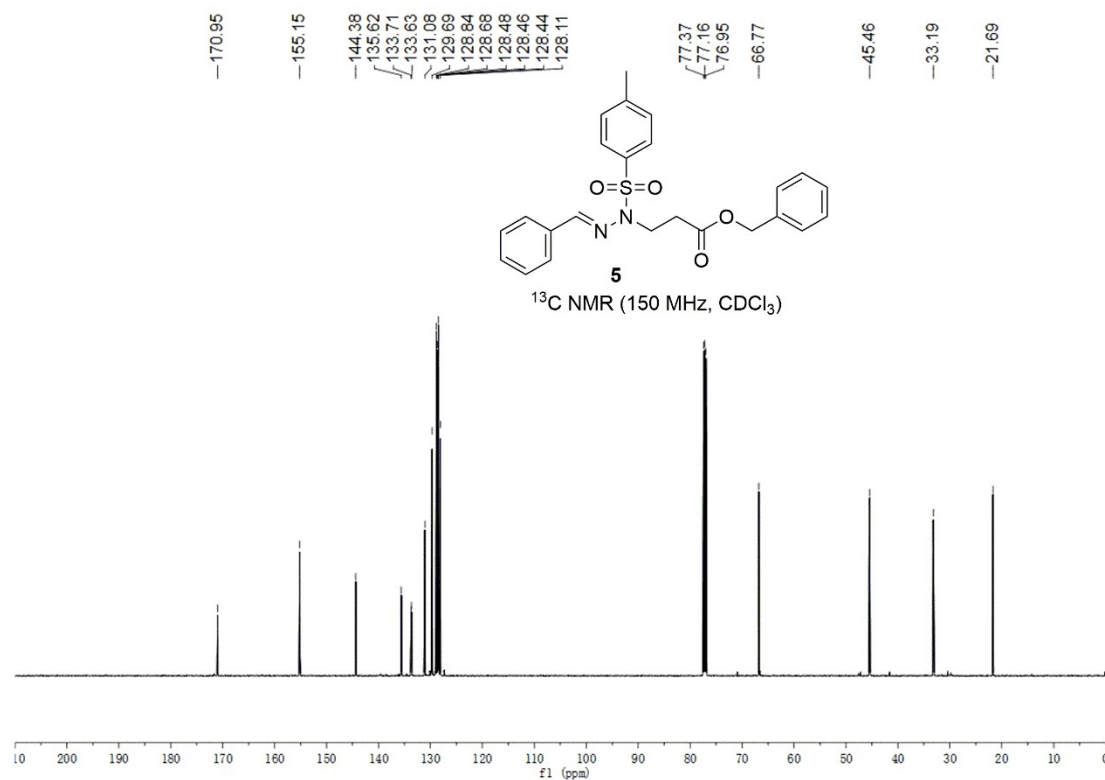

The mixture of compound 6 and 7: <sup>1</sup>H NMR

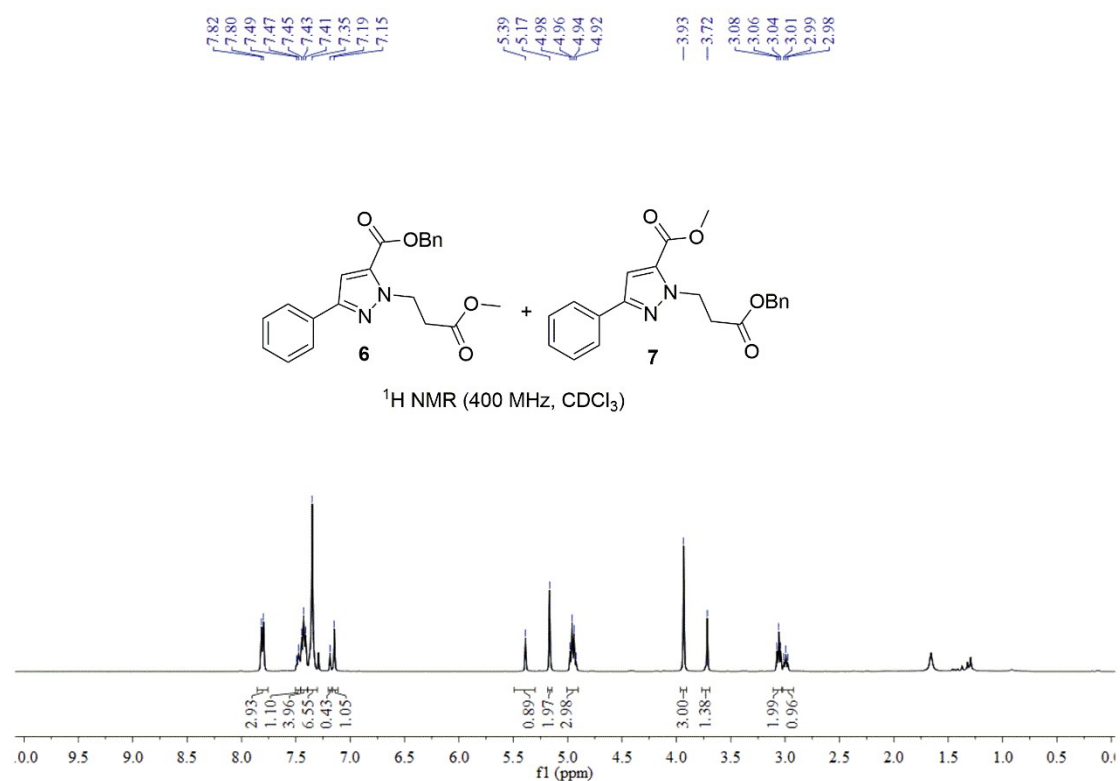

The mixture of compound 6 and 7: <sup>13</sup>C NMR

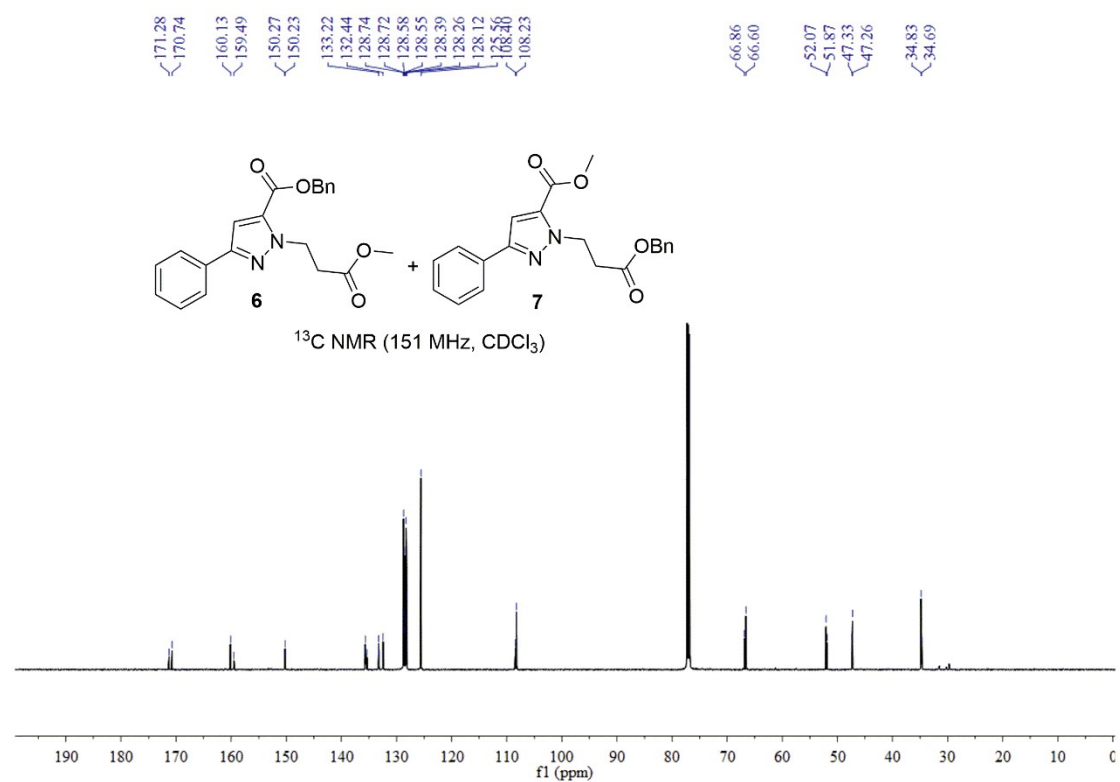

Supplement: d3ob01172k1.pdf [file d3ob01172k1.pdf]
